# Supplementary material for: Merging transcriptomics and metabolomics - advances in breast cancer profiling
Source: BMC Cancer. 2010 Nov 16;10:628. doi: 10.1186/1471-2407-10-628 (PMC2996395; doi:10.1186/1471-2407-10-628)
Supplement: Additional file 4 — Significantly lower expressed transcripts after HR MAS MRS. A summary of the 865 transcripts with significantly lower expression after HR MAS MRS, identified using Limma (R/Bioconductor). The columns ProbeUID, AgilentProbeID, GeneSymbol, SystematicName are annotations as given by Agilent. The columns logFoldChange, AverageExpression, t.statistic, p.value and adjusted.p.value are the results from the modified paired t-tests performed by Limma. [file 1471-2407-10-628-S4.XLS]

## Sheet: Sheet1
FeatureNumber	ProbeUID	AgilentProbeID	GeneSymbol	SystematicName	Description	logFoldChange	AverageExpression	t.statistic	p.value	adjusted.p.value
10122	9192	A_24_P99216	LRP10	NM_014045	Homo sapiens low density lipoprotein receptor-related protein 10 (LRP10), mRNA [NM_014045]	-1.28631	8.55255	-7.16155	5.30169e-07	0.0018248
2396	2062	A_24_P231494	DNPEP	NM_012100	Homo sapiens aspartyl aminopeptidase (DNPEP), mRNA [NM_012100]	-0.784288	9.04774	-7.59849	2.16216e-07	0.0018248
39055	35698	A_24_P252973	HEAB	NM_006831	Homo sapiens ATP/GTP-binding protein (HEAB), mRNA [NM_006831]	-0.638034	8.78554	-7.49022	2.69383e-07	0.0018248
6547	5892	A_23_P203364	TMEM109	NM_024092	Homo sapiens transmembrane protein 109 (TMEM109), mRNA [NM_024092]	-0.525421	7.82107	-7.21362	4.75778e-07	0.0018248
20608	18868	A_23_P211598	PMM1	NM_002676	Homo sapiens phosphomannomutase 1 (PMM1), mRNA [NM_002676]	-0.480463	10.9614	-7.22563	4.64075e-07	0.0018248
43197	39501	A_23_P152024	CSK	NM_004383	Homo sapiens c-src tyrosine kinase (CSK), mRNA [NM_004383]	-0.448883	8.86188	-7.154	5.38566e-07	0.0018248
14466	13253	A_23_P351342	PLEKHM2	BC068599	Homo sapiens pleckstrin homology domain containing, family M (with RUN domain) member 2, mRNA (cDNA clone IMAGE:5263629), complete cds. [BC068599]	-0.423126	9.09948	-7.45789	2.87747e-07	0.0018248
42898	39287	A_23_P416242	RNF166	NM_178841	Homo sapiens ring finger protein 166 (RNF166), mRNA [NM_178841]	-0.36298	7.86118	-7.3982	3.25131e-07	0.0018248
6319	5783	A_23_P73780	IRAK1	NM_001569	Homo sapiens interleukin-1 receptor-associated kinase 1 (IRAK1), transcript variant 1, mRNA [NM_001569]	-0.762915	10.6464	-6.92327	8.74017e-07	0.00222689
25049	22956	A_24_P185624	SLC35C2	NM_173179	Homo sapiens solute carrier family 35, member C2 (SLC35C2), transcript variant 1, mRNA [NM_173179]	-0.739627	9.331	-6.94973	8.26514e-07	0.00222689
40151	36752	A_23_P153502	AKT1S1	NM_032375	Homo sapiens AKT1 substrate 1 (proline-rich) (AKT1S1), mRNA [NM_032375]	-0.53025	8.45018	-6.90747	9.03704e-07	0.00222689
44091	40291	A_24_P347854	SYNGR2	NM_004710	Homo sapiens synaptogyrin 2 (SYNGR2), mRNA [NM_004710]	-0.824554	10.3284	-6.69095	1.43333e-06	0.002292
4964	4514	A_24_P291978	ADCK2	NM_052853	Homo sapiens aarF domain containing kinase 2 (ADCK2), mRNA [NM_052853]	-0.811619	7.95147	-6.72222	1.34047e-06	0.002292
12146	11168	A_24_P148521	TMBIM1	NM_022152	Homo sapiens transmembrane BAX inhibitor motif containing 1 (TMBIM1), mRNA [NM_022152]	-0.803922	8.56639	-6.84229	1.03765e-06	0.002292
30724	28071	A_32_P194115	UNC84B	NM_015374	Homo sapiens unc-84 homolog B (C. elegans) (UNC84B), mRNA [NM_015374]	-0.778319	9.4155	-6.62894	1.63761e-06	0.002292
3404	3010	A_24_P225448	CSRP1	NM_004078	Homo sapiens cysteine and glycine-rich protein 1 (CSRP1), mRNA [NM_004078]	-0.673852	8.56371	-6.63685	1.60999e-06	0.002292
30362	27715	A_24_P295601	KIAA0652	NM_014741	Homo sapiens KIAA0652 (KIAA0652), mRNA [NM_014741]	-0.64658	8.99778	-6.6887	1.44028e-06	0.002292
35655	32593	A_24_P331128	GNA15	NM_002068	Homo sapiens guanine nucleotide binding protein (G protein), alpha 15 (Gq class) (GNA15), mRNA [NM_002068]	-0.431537	7.61008	-6.61401	1.69114e-06	0.002292
25154	22996	A_23_P64404	FADS3	NM_021727	Homo sapiens fatty acid desaturase 3 (FADS3), mRNA [NM_021727]	-0.427491	8.60529	-6.66747	1.50743e-06	0.002292
11708	10689	A_24_P168510	MGC2749	NM_024069	Homo sapiens hypothetical protein MGC2749 (MGC2749), mRNA [NM_024069]	-0.418517	9.56417	-6.76574	1.22139e-06	0.002292
927	817	A_23_P75470	SCYL1	NM_020680	Homo sapiens SCY1-like 1 (S. cerevisiae) (SCYL1), mRNA [NM_020680]	-0.715981	9.18873	-6.59074	1.77816e-06	0.00229518
31109	28471	A_24_P235012	MTCH1	NM_014341	Homo sapiens mitochondrial carrier homolog 1 (C. elegans) (MTCH1), nuclear gene encoding mitochondrial protein, mRNA [NM_014341]	-0.950844	10.5406	-6.30973	3.27715e-06	0.0025652
38553	35248	A_23_P28238	SNX17	NM_014748	Homo sapiens sorting nexin 17 (SNX17), mRNA [NM_014748]	-0.889469	8.96199	-6.2825	3.47903e-06	0.0025652
8600	7792	A_24_P127828	VCP	NM_007126	Homo sapiens valosin-containing protein (VCP), mRNA [NM_007126]	-0.795414	9.60313	-6.29689	3.37078e-06	0.0025652
33877	31045	A_23_P41143	APEH	NM_001640	Homo sapiens N-acylaminoacyl-peptide hydrolase (APEH), mRNA [NM_001640]	-0.772195	10.5391	-6.23291	3.88006e-06	0.0025652
22691	20828	A_23_P154208	NAGK	NM_017567	Homo sapiens N-acetylglucosamine kinase (NAGK), mRNA [NM_017567]	-0.74386	11.7669	-6.47453	2.2869e-06	0.0025652
36669	33505	A_23_P121265	PTK9L	NM_007284	Homo sapiens PTK9L protein tyrosine kinase 9-like (A6-related protein) (PTK9L), mRNA [NM_007284]	-0.696578	10.4231	-6.30516	3.31013e-06	0.0025652
36175	33073	A_24_P222860	PIK4CB	NM_002651	Homo sapiens phosphatidylinositol 4-kinase, catalytic, beta polypeptide (PIK4CB), mRNA [NM_002651]	-0.692653	9.57454	-6.40234	2.6761e-06	0.0025652
6812	6221	A_23_P131308	CYP27A1	NM_000784	Homo sapiens cytochrome P450, family 27, subfamily A, polypeptide 1 (CYP27A1), nuclear gene encoding mitochondrial protein, mRNA [NM_000784]	-0.685006	8.64569	-6.2679	3.59246e-06	0.0025652
43581	39876	A_23_P107933	VRK3	NM_016440	Homo sapiens vaccinia related kinase 3 (VRK3), transcript variant 1, mRNA [NM_016440]	-0.666475	8.4697	-6.25345	3.70852e-06	0.0025652
6987	6390	A_24_P706901	BF895757	BF895757	BF895757 RC3-MT0162-221100-012-h03 MT0162 Homo sapiens cDNA, mRNA sequence [BF895757]	-0.636226	7.64238	-6.35459	2.97041e-06	0.0025652
29569	27051	A_24_P288836	HLA-DPB2	NR_001435	Homo sapiens major histocompatibility complex, class II, DP beta 2 (pseudogene) (HLA-DPB2) on chromosome 6 [NR_001435]	-0.623779	10.4875	-6.23637	3.85057e-06	0.0025652
12376	11284	A_23_P259490	MXD4	NM_006454	Homo sapiens MAX dimerization protein 4 (MXD4), mRNA [NM_006454]	-0.512415	9.79173	-6.42837	2.52845e-06	0.0025652
17173	15701	A_24_P22050	RAB20	NM_017817	Homo sapiens RAB20, member RAS oncogene family (RAB20), mRNA [NM_017817]	-0.503678	8.69983	-6.49127	2.20523e-06	0.0025652
2088	1814	A_23_P258418	TNIP2	NM_024309	Homo sapiens TNFAIP3 interacting protein 2 (TNIP2), mRNA [NM_024309]	-0.490488	9.86512	-6.39172	2.73885e-06	0.0025652
29199	26689	A_23_P160881	SMPDL3B	NM_001009568	Homo sapiens sphingomyelin phosphodiesterase, acid-like 3B (SMPDL3B), transcript variant 2, mRNA [NM_001009568]	-0.486608	8.6572	-6.43789	2.47657e-06	0.0025652
42073	38569	A_23_P131299	ZFAND2B	NM_138802	Homo sapiens zinc finger, AN1-type domain 2B (ZFAND2B), mRNA [NM_138802]	-0.47003	9.27255	-6.24062	3.81469e-06	0.0025652
32356	29672	A_23_P342131	CYBASC3	NM_153611	Homo sapiens cytochrome b, ascorbate dependent 3 (CYBASC3), mRNA [NM_153611]	-0.39957	9.4954	-6.42624	2.54022e-06	0.0025652
15205	13967	A_23_P344392	OGG1	NM_002542	Homo sapiens 8-oxoguanine DNA glycosylase (OGG1), nuclear gene encoding mitochondrial protein, transcript variant 1a, mRNA [NM_002542]	-0.388121	7.99827	-6.31853	3.21451e-06	0.0025652
21613	19781	A_24_P382026	MIF4GD	NM_020679	Homo sapiens MIF4G domain containing (MIF4GD), mRNA [NM_020679]	-0.807012	8.71651	-6.21244	4.05918e-06	0.00260683
7378	6795	A_32_P112279	CTF8	NM_001039690	Homo sapiens chromosome transmission fidelity factor 8 homolog (S. cerevisiae) (CTF8), transcript variant 1, mRNA [NM_001039690]	-0.705596	9.54067	-6.18342	4.32772e-06	0.00260683
31025	28472	A_23_P138782	ACP2	NM_001610	Homo sapiens acid phosphatase 2, lysosomal (ACP2), mRNA [NM_001610]	-0.448771	7.16206	-6.18477	4.31477e-06	0.00260683
19745	18086	A_24_P700170	A_24_P700170	A_24_P700170	Unknown	-0.989728	9.87237	-6.08724	5.35539e-06	0.00261871
21519	19610	A_23_P12082	CHI3L2	NM_004000	Homo sapiens chitinase 3-like 2 (CHI3L2), transcript variant 1, mRNA [NM_004000]	-0.852784	8.78335	-6.09668	5.24428e-06	0.00261871
14146	12980	A_23_P157809	LTB4DH	NM_012212	Homo sapiens leukotriene B4 12-hydroxydehydrogenase (LTB4DH), mRNA [NM_012212]	-0.753584	10.9232	-6.10154	5.18795e-06	0.00261871
33555	30769	A_24_P206047	SLC25A4	NM_001151	Homo sapiens solute carrier family 25 (mitochondrial carrier; adenine nucleotide translocator), member 4 (SLC25A4), nuclear gene encoding mitochondrial protein, mRNA [NM_001151]	-0.739139	10.5808	-6.11624	5.02149e-06	0.00261871
20026	18287	A_24_P345948	DCTD	NM_001012732	Homo sapiens dCMP deaminase (DCTD), transcript variant 1, mRNA [NM_001012732]	-0.738538	9.72041	-6.14908	4.6691e-06	0.00261871
25614	23373	A_24_P305541	TRIB3	NM_021158	Homo sapiens tribbles homolog 3 (Drosophila) (TRIB3), mRNA [NM_021158]	-0.731514	8.01558	-6.06687	5.60338e-06	0.00261871
36239	33186	A_24_P135921	A_24_P135921	A_24_P135921	Unknown	-0.702982	9.18738	-6.06804	5.5888e-06	0.00261871
24163	22124	A_24_P324277	LOC407835	NR_002144	Homo sapiens mitogen-activated protein kinase kinase 2 pseudogene (LOC407835) on chromosome 7 [NR_002144]	-0.695853	8.99824	-6.13819	4.78306e-06	0.00261871
8155	7443	A_32_P214943	PCBP2	NM_031989	Homo sapiens poly(rC) binding protein 2 (PCBP2), transcript variant 2, mRNA [NM_031989]	-0.601636	9.0873	-6.11879	4.99322e-06	0.00261871
18939	17385	A_23_P119377	PSCD2	NM_004228	Homo sapiens pleckstrin homology, Sec7 and coiled-coil domains 2 (cytohesin-2) (PSCD2), transcript variant 2, mRNA [NM_004228]	-0.593517	10.0505	-6.1011	5.19305e-06	0.00261871
33761	30834	A_24_P358381	GTPBP6	NM_012227	Homo sapiens GTP binding protein 6 (putative) (GTPBP6), mRNA [NM_012227]	-0.518322	8.33175	-6.14895	4.67054e-06	0.00261871
12771	11690	A_24_P181677	PQLC1	NM_025078	Homo sapiens PQ loop repeat containing 1 (PQLC1), mRNA [NM_025078]	-0.430515	9.45824	-6.14158	4.74731e-06	0.00261871
9154	8352	A_23_P120839	TFIP11	NM_001008697	Homo sapiens tuftelin interacting protein 11 (TFIP11), transcript variant 1, mRNA [NM_001008697]	-0.375632	9.73797	-6.07936	5.44995e-06	0.00261871
10095	9296	A_23_P77328	GCHFR	NM_005258	Homo sapiens GTP cyclohydrolase I feedback regulator (GCHFR), mRNA [NM_005258]	-0.698849	10.0779	-6.03342	6.03643e-06	0.00268235
42636	38974	A_23_P55926	NR1H2	NM_007121	Homo sapiens nuclear receptor subfamily 1, group H, member 2 (NR1H2), mRNA [NM_007121]	-0.488477	8.56385	-6.03631	5.99758e-06	0.00268235
6288	5723	A_23_P121051	PCCB	NM_000532	Homo sapiens propionyl Coenzyme A carboxylase, beta polypeptide (PCCB), mRNA [NM_000532]	-0.940432	8.85126	-5.99041	6.64405e-06	0.00273262
27912	25579	A_24_P42681	PSMD2	NM_002808	Homo sapiens proteasome (prosome, macropain) 26S subunit, non-ATPase, 2 (PSMD2), mRNA [NM_002808]	-0.865431	10.6023	-5.98303	6.75443e-06	0.00273262
26833	24515	A_24_P203984	A_24_P203984	A_24_P203984	Unknown	-0.623236	10.2968	-5.99558	6.56775e-06	0.00273262
1989	1633	A_23_P35082	SESN2	NM_031459	Homo sapiens sestrin 2 (SESN2), mRNA [NM_031459]	-0.450929	8.71096	-5.98533	6.71986e-06	0.00273262
29922	27379	A_23_P6398	AP1B1	NM_001127	Homo sapiens adaptor-related protein complex 1, beta 1 subunit (AP1B1), transcript variant 1, mRNA [NM_001127]	-0.635974	8.35393	-5.91958	7.78465e-06	0.00281347
26369	24133	A_24_P151084	CNDP2	NM_018235	Homo sapiens CNDP dipeptidase 2 (metallopeptidase M20 family) (CNDP2), mRNA [NM_018235]	-0.609826	9.98259	-5.95888	7.12895e-06	0.00281347
44521	40571	A_24_P181055	ST3GAL4	NM_006278	Homo sapiens ST3 beta-galactoside alpha-2,3-sialyltransferase 4 (ST3GAL4), mRNA [NM_006278]	-0.582853	9.37483	-5.92789	7.64096e-06	0.00281347
3022	2607	A_23_P88817	MLYCD	NM_012213	Homo sapiens malonyl-CoA decarboxylase (MLYCD), nuclear gene encoding mitochondrial protein, mRNA [NM_012213]	-0.573645	8.00455	-5.94529	7.34914e-06	0.00281347
37146	33906	A_24_P5550	PHF23	NM_024297	Homo sapiens PHD finger protein 23 (PHF23), mRNA [NM_024297]	-0.572268	8.29632	-5.93799	7.47015e-06	0.00281347
14381	13100	A_23_P107661	PPP2R1A	NM_014225	Homo sapiens protein phosphatase 2 (formerly 2A), regulatory subunit A (PR 65), alpha isoform (PPP2R1A), mRNA [NM_014225]	-0.551201	11.1958	-5.95598	7.17546e-06	0.00281347
13664	12560	A_23_P385081	SCAMP2	NM_005697	Homo sapiens secretory carrier membrane protein 2 (SCAMP2), mRNA [NM_005697]	-0.523691	8.70376	-5.91965	7.78339e-06	0.00281347
24936	22761	A_23_P32229	CIZ1	NM_012127	Homo sapiens CDKN1A interacting zinc finger protein 1 (CIZ1), mRNA [NM_012127]	-0.475909	9.01942	-5.93085	7.59049e-06	0.00281347
31932	29203	A_24_P392099	A_24_P392099	A_24_P392099	Unknown	-0.881342	8.36894	-5.87279	8.64637e-06	0.00284345
35347	32334	A_24_P349606	A_24_P349606	A_24_P349606	Unknown	-0.727906	8.84349	-5.86935	8.71341e-06	0.00284345
7446	6763	A_23_P352870	PVRL2	NM_002856	Homo sapiens poliovirus receptor-related 2 (herpesvirus entry mediator B) (PVRL2), mRNA [NM_002856]	-0.665825	10.1673	-5.8945	8.23506e-06	0.00284345
10777	9920	A_24_P148836	KLHDC8B	NM_173546	Homo sapiens kelch domain containing 8B (KLHDC8B), mRNA [NM_173546]	-0.520197	8.39908	-5.89913	8.14993e-06	0.00284345
34839	31871	A_24_P55719	SURF5	NM_133640	Homo sapiens surfeit 5 (SURF5), transcript variant b, mRNA [NM_133640]	-0.51117	9.13429	-5.90054	8.12413e-06	0.00284345
34652	31686	A_23_P5610	DOK1	NM_001381	Homo sapiens docking protein 1, 62kDa (downstream of tyrosine kinase 1) (DOK1), mRNA [NM_001381]	-0.501759	7.80204	-5.86436	8.8117e-06	0.00284345
3575	3175	A_23_P123010	BCL7B	NM_138707	Homo sapiens B-cell CLL/lymphoma 7B (BCL7B), transcript variant 2, mRNA [NM_138707]	-0.48075	7.51131	-5.88181	8.47282e-06	0.00284345
2302	1894	A_23_P26223	ASL	NM_000048	Homo sapiens argininosuccinate lyase (ASL), transcript variant 2, mRNA [NM_000048]	-0.424755	10.3434	-5.86686	8.7622e-06	0.00284345
40434	36963	A_23_P82296	GNB2	NM_005273	Homo sapiens guanine nucleotide binding protein (G protein), beta polypeptide 2 (GNB2), mRNA [NM_005273]	-0.704727	11.4553	-5.81332	9.88407e-06	0.00307951
15066	13718	A_23_P130553	SHKBP1	NM_138392	Homo sapiens SH3KBP1 binding protein 1 (SHKBP1), mRNA [NM_138392]	-0.405217	7.85515	-5.81902	9.7579e-06	0.00307951
8412	7757	A_23_P68922	MICAL-L1	NM_033386	Homo sapiens MICAL-like 1 (MICAL-L1), mRNA [NM_033386]	-0.395298	7.66627	-5.81495	9.84792e-06	0.00307951
13639	12510	A_23_P67271	PKN1	NM_002741	Homo sapiens protein kinase N1 (PKN1), transcript variant 2, mRNA [NM_002741]	-0.592342	8.99235	-5.78809	1.04627e-05	0.00318653
29424	26938	A_24_P516215	NOB1	NM_014062	Homo sapiens NIN1/RPN12 binding protein 1 homolog (S. cerevisiae) (NOB1), mRNA [NM_014062]	-0.41738	8.34052	-5.79005	1.04165e-05	0.00318653
4510	3981	A_23_P26759	CANT1	NM_138793	Homo sapiens calcium activated nucleotidase 1 (CANT1), mRNA [NM_138793]	-0.691507	8.97369	-5.77621	1.07468e-05	0.00319267
16695	15292	A_23_P108326	NR2F6	NM_005234	Homo sapiens nuclear receptor subfamily 2, group F, member 6 (NR2F6), mRNA [NM_005234]	-0.639131	10.1374	-5.75681	1.12283e-05	0.00319267
9416	8671	A_32_P209989	MRPL46	NM_022163	Homo sapiens mitochondrial ribosomal protein L46 (MRPL46), nuclear gene encoding mitochondrial protein, mRNA [NM_022163]	-0.601971	9.46559	-5.7629	1.10749e-05	0.00319267
3899	3467	A_24_P255338	SEC24C	NM_004922	Homo sapiens SEC24 related gene family, member C (S. cerevisiae) (SEC24C), transcript variant 1, mRNA [NM_004922]	-0.560204	8.99107	-5.76561	1.10073e-05	0.00319267
15318	14016	A_23_P13338	INTS5	NM_030628	Homo sapiens integrator complex subunit 5 (INTS5), mRNA [NM_030628]	-0.534958	7.99921	-5.74684	1.14842e-05	0.00320919
27266	25006	A_24_P323885	A_24_P323885	A_24_P323885	Unknown	-0.859996	8.83194	-5.69279	1.29788e-05	0.00322033
16527	15139	A_24_P114124	LAPTM5	NM_006762	Homo sapiens lysosomal associated multispanning membrane protein 5 (LAPTM5), mRNA [NM_006762]	-0.812411	8.92325	-5.59284	1.62877e-05	0.00322033
12593	11529	A_24_P370420	WBSCR16	NM_030798	Homo sapiens Williams-Beuren syndrome chromosome region 16 (WBSCR16), mRNA [NM_030798]	-0.679386	9.22184	-5.71763	1.22686e-05	0.00322033
6023	5545	A_24_P59099	LOC643668	XM_928629	PREDICTED: Homo sapiens similar to peptidase (prosome, macropain) 26S subunit, ATPase 1, transcript variant 1 (LOC643668), mRNA [XM_928629]	-0.678712	10.1989	-5.68225	1.32927e-05	0.00322033
30312	27780	A_23_P302207	DKFZp434J1015	AL133055	Homo sapiens mRNA; cDNA DKFZp434J1015 (from clone DKFZp434J1015). [AL133055]	-0.674186	7.33208	-5.6598	1.39872e-05	0.00322033
723	604	A_32_P26103	AGPAT2	NM_006412	Homo sapiens 1-acylglycerol-3-phosphate O-acyltransferase 2 (lysophosphatidic acid acyltransferase, beta) (AGPAT2), transcript variant 1, mRNA [NM_006412]	-0.671162	8.59883	-5.6051	1.58394e-05	0.00322033
31834	29179	A_23_P12601	DHTKD1	NM_018706	Homo sapiens dehydrogenase E1 and transketolase domain containing 1 (DHTKD1), mRNA [NM_018706]	-0.655081	8.09312	-5.66138	1.39373e-05	0.00322033
36730	33609	A_24_P396375	CR595983	CR595983	full-length cDNA clone CS0DI039YA23 of Placenta Cot 25-normalized of Homo sapiens (human). [CR595983]	-0.651368	10.2668	-5.59596	1.61723e-05	0.00322033
2151	1772	A_24_P254346	DSCR3	NM_006052	Homo sapiens Down syndrome critical region gene 3 (DSCR3), mRNA [NM_006052]	-0.63336	10.0466	-5.7365	1.17558e-05	0.00322033
33646	30782	A_24_P222126	TH1L	NM_198976	Homo sapiens TH1-like (Drosophila) (TH1L), transcript variant 1, mRNA [NM_198976]	-0.626164	9.21224	-5.71766	1.48189e-05	0.00322033
2519	2138	A_24_P298420	PRMT5	NM_006109	Homo sapiens protein arginine methyltransferase 5 (PRMT5), transcript variant 1, mRNA [NM_006109]	-0.605105	8.42443	-5.72863	1.1967e-05	0.00322033
3857	3389	A_24_P193570	CNOT1	NM_016284	Homo sapiens CCR4-NOT transcription complex, subunit 1 (CNOT1), transcript variant 1, mRNA [NM_016284]	-0.577346	9.28089	-5.68837	1.31095e-05	0.00322033
7269	6593	A_23_P51718	PABPC4	NM_003819	Homo sapiens poly(A) binding protein, cytoplasmic 4 (inducible form) (PABPC4), mRNA [NM_003819]	-0.550969	8.65089	-5.63801	1.46969e-05	0.00322033
1986	1627	A_24_P388570	MINA	NM_032778	Homo sapiens MYC induced nuclear antigen (MINA), transcript variant 3, mRNA [NM_032778]	-0.534418	8.24204	-5.6659	1.37949e-05	0.00322033
16822	15374	A_24_P262221	ZNRF1	NM_032268	Homo sapiens zinc and ring finger 1 (ZNRF1), mRNA [NM_032268]	-0.534226	8.59372	-5.5978	1.61048e-05	0.00322033
11406	10447	A_24_P276490	LYPLA2	NM_007260	Homo sapiens lysophospholipase II (LYPLA2), mRNA [NM_007260]	-0.495277	7.40829	-5.60863	1.57125e-05	0.00322033
30194	27562	A_23_P119526	AP3D1	NM_003938	Homo sapiens adaptor-related protein complex 3, delta 1 subunit (AP3D1), mRNA [NM_003938]	-0.489375	10.3108	-5.62888	1.50051e-05	0.00322033
36662	33491	A_23_P75647	HYOU1	NM_006389	Homo sapiens hypoxia up-regulated 1 (HYOU1), mRNA [NM_006389]	-0.487378	8.83198	-5.59754	1.61141e-05	0.00322033
35796	32696	A_23_P1926	FLJ20487	NM_017841	Homo sapiens hypothetical protein FLJ20487 (FLJ20487), mRNA [NM_017841]	-0.486621	10.9907	-5.61623	1.5443e-05	0.00322033
12281	11263	A_32_P86009	A_32_P86009	A_32_P86009	Unknown	-0.478663	9.44037	-5.66494	1.3825e-05	0.00322033
26103	23803	A_23_P141917	TYK2	NM_003331	Homo sapiens tyrosine kinase 2 (TYK2), mRNA [NM_003331]	-0.476836	8.03971	-5.66512	1.38196e-05	0.00322033
40424	36943	A_23_P397055	CSGlcA-T	NM_019015	Homo sapiens chondroitin sulfate glucuronyltransferase (CSGlcA-T), mRNA [NM_019015]	-0.468807	9.78734	-5.64377	1.45058e-05	0.00322033
22095	20200	A_23_P68899	TXN2	NM_012473	Homo sapiens thioredoxin 2 (TXN2), nuclear gene encoding mitochondrial protein, mRNA [NM_012473]	-0.462327	11.1263	-5.60593	1.58093e-05	0.00322033
39617	36249	A_23_P61987	TMEM121	NM_025268	Homo sapiens transmembrane protein 121 (TMEM121), mRNA [NM_025268]	-0.441332	13.0789	-5.62644	1.50887e-05	0.00322033
33366	30579	A_24_P414045	GCS1	NM_006302	Homo sapiens glucosidase I (GCS1), mRNA [NM_006302]	-0.4233	9.65352	-5.72209	1.21453e-05	0.00322033
22764	20808	A_23_P26243	CCNDBP1	NM_037370	Homo sapiens cyclin D-type binding-protein 1 (CCNDBP1), transcript variant 2, mRNA [NM_037370]	-0.419096	12.0627	-5.64805	1.43657e-05	0.00322033
19080	17490	A_23_P50962	NCK2	NM_003581	Homo sapiens NCK adaptor protein 2 (NCK2), transcript variant 1, mRNA [NM_003581]	-0.415069	7.49937	-5.67271	1.35833e-05	0.00322033
31061	28382	A_23_P4425	FLII	NM_002018	Homo sapiens flightless I homolog (Drosophila) (FLII), mRNA [NM_002018]	-0.388179	12.2368	-5.6932	1.29669e-05	0.00322033
23840	21842	A_24_P64329	STK32C	NM_173575	Homo sapiens serine/threonine kinase 32C (STK32C), mRNA [NM_173575]	-0.37581	8.82217	-5.61346	1.55407e-05	0.00322033
31445	28777	A_23_P101111	CTDP1	NM_004715	Homo sapiens CTD (carboxy-terminal domain, RNA polymerase II, polypeptide A) phosphatase, subunit 1 (CTDP1), transcript variant FCP1a, mRNA [NM_004715]	-0.366224	10.3143	-5.67962	1.33721e-05	0.00322033
30385	27758	A_23_P325547	DUS3L	NM_020175	Homo sapiens dihydrouridine synthase 3-like (S. cerevisiae) (DUS3L), mRNA [NM_020175]	-0.366003	8.7476	-5.69113	1.30276e-05	0.00322033
37208	34021	A_24_P390668	FMNL1	NM_005892	Homo sapiens formin-like 1 (FMNL1), mRNA [NM_005892]	-0.345574	7.64196	-5.65254	1.42197e-05	0.00322033
11624	10690	A_23_P27515	PLD3	NM_012268	Homo sapiens phospholipase D family, member 3 (PLD3), transcript variant 2, mRNA [NM_012268]	-0.337266	9.95516	-5.70335	1.26719e-05	0.00322033
25239	23151	A_23_P207367	STAT5A	NM_003152	Homo sapiens signal transducer and activator of transcription 5A (STAT5A), mRNA [NM_003152]	-0.333285	9.68678	-5.5941	1.62408e-05	0.00322033
2409	2088	A_23_P154801	TRPC4AP	NM_015638	Homo sapiens transient receptor potential cation channel, subfamily C, member 4 associated protein (TRPC4AP), transcript variant 1, mRNA [NM_015638]	-0.328792	9.56709	-5.6425	1.45478e-05	0.00322033
33855	31005	A_32_P41496	THC2457445	THC2457445	Q8NFZ5 (Q8NFZ5) Fetal liver LKB1-interacting protein, partial (28%) [THC2457445]	-0.360093	10.2007	-5.5816	1.67101e-05	0.00323531
20212	18458	A_24_P71021	GNB1	NM_002074	Homo sapiens guanine nucleotide binding protein (G protein), beta polypeptide 1 (GNB1), mRNA [NM_002074]	-0.656361	10.2242	-5.56694	1.72777e-05	0.0032981
35989	32889	A_23_P134910	GGH	NM_003878	Homo sapiens gamma-glutamyl hydrolase (conjugase, folylpolygammaglutamyl hydrolase) (GGH), mRNA [NM_003878]	-0.752671	9.63313	-5.55157	1.78944e-05	0.00330259
37414	34240	A_24_P614940	A_24_P614940	A_24_P614940	Unknown	-0.614116	10.8039	-5.5482	1.80323e-05	0.00330259
7406	6686	A_24_P9285	LMAN2	NM_006816	Homo sapiens lectin, mannose-binding 2 (LMAN2), mRNA [NM_006816]	-0.593111	12.6148	-5.55741	1.76573e-05	0.00330259
30962	28356	A_24_P343621	ECHDC3	NM_024693	Homo sapiens enoyl Coenzyme A hydratase domain containing 3 (ECHDC3), mRNA [NM_024693]	-0.511825	8.79383	-5.56086	1.75189e-05	0.00330259
31415	28721	A_23_P254888	ZYX	NM_003461	Homo sapiens zyxin (ZYX), transcript variant 1, mRNA [NM_003461]	-0.489965	10.1748	-5.54951	1.79786e-05	0.00330259
28241	25871	A_23_P17330	UCKL1	NM_017859	Homo sapiens uridine-cytidine kinase 1-like 1 (UCKL1), mRNA [NM_017859]	-0.404186	8.83006	-5.54	1.83731e-05	0.00334243
5999	5501	A_32_P119616	ETFA	NM_000126	Homo sapiens electron-transfer-flavoprotein, alpha polypeptide (glutaric aciduria II) (ETFA), nuclear gene encoding mitochondrial protein, mRNA [NM_000126]	-0.707901	9.62223	-5.5119	1.95912e-05	0.00335408
27737	25409	A_24_P63950	AP1S1	NM_001283	Homo sapiens adaptor-related protein complex 1, sigma 1 subunit (AP1S1), transcript variant 1, mRNA [NM_001283]	-0.66242	7.58539	-5.50212	2.00343e-05	0.00335408
6820	6236	A_24_P467358	EEF1G	NM_001404	Homo sapiens eukaryotic translation elongation factor 1 gamma (EEF1G), mRNA [NM_001404]	-0.656466	14.0032	-5.53178	1.87213e-05	0.00335408
27325	24959	A_23_P29566	ARPC4	NM_005718	Homo sapiens actin related protein 2/3 complex, subunit 4, 20kDa (ARPC4), transcript variant 1, mRNA [NM_005718]	-0.589443	8.4748	-5.51674	1.93755e-05	0.00335408
17650	16110	A_24_P302332	NECAP2	NM_018090	Homo sapiens NECAP endocytosis associated 2 (NECAP2), mRNA [NM_018090]	-0.586343	8.17069	-5.50089	2.00904e-05	0.00335408
7998	7308	A_23_P501339	CDIPT	NM_145752	Homo sapiens CDP-diacylglycerol--inositol 3-phosphatidyltransferase (phosphatidylinositol synthase) (CDIPT), transcript variant 2, mRNA [NM_145752]	-0.524644	9.98134	-5.49917	2.01695e-05	0.00335408
39787	36405	A_32_P132317	GPR155	NM_001033045	Homo sapiens G protein-coupled receptor 155 (GPR155), transcript variant 1, mRNA [NM_001033045]	-0.445217	8.516	-5.50986	1.96826e-05	0.00335408
8363	7672	A_24_P159948	ARFRP1	NM_003224	Homo sapiens ADP-ribosylation factor related protein 1 (ARFRP1), mRNA [NM_003224]	-0.4331	8.29888	-5.50556	1.9877e-05	0.00335408
15893	14603	A_23_P154058	EIF2B4	NM_172195	Homo sapiens eukaryotic translation initiation factor 2B, subunit 4 delta, 67kDa (EIF2B4), transcript variant 1, mRNA [NM_172195]	-0.425704	9.84079	-5.51472	1.94651e-05	0.00335408
27666	25279	A_23_P208835	MAP2K2	NM_030662	Homo sapiens mitogen-activated protein kinase kinase 2 (MAP2K2), mRNA [NM_030662]	-0.37662	10.7005	-5.50404	1.99465e-05	0.00335408
3240	2858	A_32_P209094	FLJ10986	NM_018291	Homo sapiens hypothetical protein FLJ10986 (FLJ10986), mRNA [NM_018291]	-0.361985	10.6252	-5.5295	1.88189e-05	0.00335408
26330	24061	A_23_P78892	FBL	NM_001436	Homo sapiens fibrillarin (FBL), mRNA [NM_001436]	-0.396022	13.5516	-5.49572	2.03295e-05	0.00336007
14604	13348	A_24_P43681	DBNL	NM_014063	Homo sapiens drebrin-like (DBNL), transcript variant 1, mRNA [NM_014063]	-0.61295	9.62633	-5.48272	2.09434e-05	0.00337668
36462	33439	A_23_P97274	SCAMP3	NM_052837	Homo sapiens secretory carrier membrane protein 3 (SCAMP3), transcript variant 2, mRNA [NM_052837]	-0.524258	10.7084	-5.48394	2.0885e-05	0.00337668
28292	25962	A_24_P856176	A_24_P856176	A_24_P856176	Unknown	-0.546267	8.92028	-5.46906	2.16086e-05	0.00341867
29671	27083	A_24_P54485	CCDC115	NM_032357	Homo sapiens coiled-coil domain containing 115 (CCDC115), mRNA [NM_032357]	-0.475692	9.92095	-5.46277	2.19221e-05	0.00341867
25822	23600	A_24_P930741	BC039363	BC039363	Homo sapiens cDNA clone IMAGE:5270672. [BC039363]	-0.426902	8.26336	-5.46023	2.20502e-05	0.00341867
21681	19749	A_24_P295745	HSPA8	NM_153201	Homo sapiens heat shock 70kDa protein 8 (HSPA8), transcript variant 2, mRNA [NM_153201]	-1.05678	11.3363	-5.4539	2.23722e-05	0.00344558
25150	22988	A_24_P161655	A_24_P161655	A_24_P161655	Unknown	-1.10763	10.9971	-5.43075	2.3592e-05	0.00347919
21997	20176	A_23_P162918	SERPINA3	NM_001085	Homo sapiens serpin peptidase inhibitor, clade A (alpha-1 antiproteinase, antitrypsin), member 3 (SERPINA3), mRNA [NM_001085]	-1.09271	11.7272	-5.42792	2.37457e-05	0.00347919
37973	34803	A_24_P938236	X03757	X03757	Human mRNA fragment for Na/K-ATPase alpha subunit. [X03757]	-0.836685	9.23079	-5.43725	2.32428e-05	0.00347919
5531	4943	A_24_P827738	A_24_P827738	A_24_P827738	Unknown	-0.646375	9.30531	-5.43483	2.33722e-05	0.00347919
31907	29159	A_23_P430764	CDC42SE2	NM_020240	Homo sapiens CDC42 small effector 2 (CDC42SE2), transcript variant 1, mRNA [NM_020240]	-0.546488	7.61888	-5.42814	2.37337e-05	0.00347919
38149	34974	A_23_P73511	ARAF	NM_001654	Homo sapiens v-raf murine sarcoma 3611 viral oncogene homolog (ARAF), mRNA [NM_001654]	-0.510746	9.3144	-5.44221	2.29797e-05	0.00347919
11460	10545	A_23_P213359	PCDH1	NM_002587	Homo sapiens protocadherin 1 (cadherin-like 1) (PCDH1), transcript variant 1, mRNA [NM_002587]	-0.43498	9.0169	-5.43596	2.33116e-05	0.00347919
25119	22930	A_24_P177795	ENST00000343149	ENST00000343149	Unknown	-0.431756	15.8514	-5.43912	2.31432e-05	0.00347919
34691	31759	A_24_P309317	PSAP	NM_002778	Homo sapiens prosaposin (variant Gaucher disease and variant metachromatic leukodystrophy) (PSAP), transcript variant 1, mRNA [NM_002778]	-0.957884	11.5601	-5.42156	2.40947e-05	0.00351135
28070	25715	A_24_P148777	RASSF1	NM_170717	Homo sapiens Ras association (RalGDS/AF-6) domain family 1 (RASSF1), transcript variant G, mRNA [NM_170717]	-0.502371	9.45363	-5.41905	2.4234e-05	0.00351276
7089	6423	A_23_P60286	EIF4B	NM_001417	Homo sapiens eukaryotic translation initiation factor 4B (EIF4B), mRNA [NM_001417]	-0.630782	9.83672	-5.41414	2.45084e-05	0.00353365
26194	23969	A_24_P414999	LAPTM4B	NM_018407	Homo sapiens lysosomal associated protein transmembrane 4 beta (LAPTM4B), mRNA [NM_018407]	-0.896886	9.59938	-5.39875	2.53903e-05	0.00358348
33699	30876	A_23_P61960	ATP6V0E2L	NM_145230	Homo sapiens ATPase, H+ transporting V0 subunit E2-like (rat) (ATP6V0E2L), mRNA [NM_145230]	-0.712983	8.65946	-5.39739	2.54695e-05	0.00358348
37564	34358	A_23_P96568	FLNA	NM_001456	Homo sapiens filamin A, alpha (actin binding protein 280) (FLNA), mRNA [NM_001456]	-0.650477	10.5125	-5.39636	2.553e-05	0.00358348
22555	20579	A_23_P57033	TOMM34	NM_006809	Homo sapiens translocase of outer mitochondrial membrane 34 (TOMM34), nuclear gene encoding mitochondrial protein, mRNA [NM_006809]	-0.465792	7.10874	-5.39436	2.56472e-05	0.00358348
40075	36619	A_23_P253046	UGP2	NM_006759	Homo sapiens UDP-glucose pyrophosphorylase 2 (UGP2), transcript variant 1, mRNA [NM_006759]	-0.398741	11.5734	-5.40362	2.51077e-05	0.00358348
45094	41034	A_23_P157147	ZDHHC4	NM_018106	Homo sapiens zinc finger, DHHC-type containing 4 (ZDHHC4), mRNA [NM_018106]	-0.398309	12.1587	-5.38993	2.59101e-05	0.00360163
1256	1087	A_23_P29851	LRPAP1	NM_002337	Homo sapiens low density lipoprotein receptor-related protein associated protein 1 (LRPAP1), mRNA [NM_002337]	-0.628835	10.666	-5.3823	2.6368e-05	0.0036345
16898	15509	A_32_P218636	LOC494150	BC014228	Homo sapiens prohibitin pseudogene, mRNA (cDNA clone MGC:20874 IMAGE:4547239), complete cds. [BC014228]	-0.554625	12.0778	-5.38153	2.64147e-05	0.0036345
11217	10260	A_23_P70539	HLA-C	CR598918	full-length cDNA clone CS0DE006YG20 of Placenta of Homo sapiens (human). [CR598918]	-0.744805	13.9681	-5.36861	2.72111e-05	0.0036355
30481	27931	A_24_P130962	TOR3A	NM_022371	Homo sapiens torsin family 3, member A (TOR3A), mRNA [NM_022371]	-0.490963	9.25761	-5.37296	2.69407e-05	0.0036355
42980	39282	A_23_P96985	PSEN2	NM_012486	Homo sapiens presenilin 2 (Alzheimer disease 4) (PSEN2), transcript variant 2, mRNA [NM_012486]	-0.483742	7.90934	-5.36999	2.71251e-05	0.0036355
22439	20521	A_23_P49708	GRN	NM_002087	Homo sapiens granulin (GRN), transcript variant 1, mRNA [NM_002087]	-0.290714	15.4509	-5.37074	2.70783e-05	0.0036355
37224	34049	A_23_P209519	DNAJB2	NM_006736	Homo sapiens DnaJ (Hsp40) homolog, subfamily B, member 2 (DNAJB2), transcript variant 2, mRNA [NM_006736]	-0.700396	8.9945	-5.36596	2.73774e-05	0.00363771
2882	2505	A_23_P67466	PSMD8	NM_002812	Homo sapiens proteasome (prosome, macropain) 26S subunit, non-ATPase, 8 (PSMD8), mRNA [NM_002812]	-0.48747	12.7138	-5.35714	2.79392e-05	0.00369424
27541	25204	A_23_P333420	RANGAP1	NM_002883	Homo sapiens Ran GTPase activating protein 1 (RANGAP1), mRNA [NM_002883]	-0.590217	8.9429	-5.35494	2.80806e-05	0.00369492
28898	26449	A_23_P120947	XRCC6	NM_001469	Homo sapiens X-ray repair complementing defective repair in Chinese hamster cells 6 (Ku autoantigen, 70kDa) (XRCC6), mRNA [NM_001469]	-0.791401	11.8561	-5.34954	2.84316e-05	0.0037203
26813	24478	A_23_P89056	NUP93	NM_014669	Homo sapiens nucleoporin 93kDa (NUP93), mRNA [NM_014669]	-0.525258	9.93827	-5.34569	2.86853e-05	0.0037203
43717	39948	A_24_P117053	LRFN3	NM_024509	Homo sapiens leucine rich repeat and fibronectin type III domain containing 3 (LRFN3), mRNA [NM_024509]	-0.473619	7.80124	-5.34761	2.85582e-05	0.0037203
15049	13690	A_24_P329353	TMEM142B	NM_032831	Homo sapiens transmembrane protein 142B (TMEM142B), mRNA [NM_032831]	-0.63488	8.89781	-5.34165	2.89532e-05	0.00372602
7275	6603	A_23_P215175	ABCF2	NM_005692	Homo sapiens ATP-binding cassette, sub-family F (GCN20), member 2 (ABCF2), nuclear gene encoding mitochondrial protein, transcript variant 2, mRNA [NM_005692]	-0.455747	10.0003	-5.3393	2.91099e-05	0.00372602
32478	29738	A_24_P682601	A_24_P682601	A_24_P682601	Unknown	-0.817599	9.24833	-5.3208	3.03778e-05	0.00379457
20813	19082	A_23_P149470	NDUFS2	NM_004550	Homo sapiens NADH dehydrogenase (ubiquinone) Fe-S protein 2, 49kDa (NADH-coenzyme Q reductase) (NDUFS2), mRNA [NM_004550]	-0.809143	11.193	-5.32131	3.03419e-05	0.00379457
30330	27813	A_23_P26878	NDEL1	NM_030808	Homo sapiens nudE nuclear distribution gene E homolog like 1 (A. nidulans) (NDEL1), transcript variant 2, mRNA [NM_030808]	-0.547571	8.9786	-5.32322	3.02089e-05	0.00379457
41608	38020	A_23_P68966	CR626044	CR626044	full-length cDNA clone CS0DI082YE05 of Placenta Cot 25-normalized of Homo sapiens (human). [CR626044]	-0.301773	7.18977	-5.32524	3.00684e-05	0.00379457
15106	13788	A_32_P147505	CR616772	CR616772	full-length cDNA clone CS0DA001YA12 of Neuroblastoma of Homo sapiens (human). [CR616772]	-0.793297	11.1706	-5.30771	3.13084e-05	0.00381379
35309	32266	A_23_P51361	TXLNA	NM_175852	Homo sapiens taxilin alpha (TXLNA), mRNA [NM_175852]	-0.736032	8.10051	-5.31347	3.08948e-05	0.00381379
10925	10036	A_23_P162739	TSC22D1	NM_183422	Homo sapiens TSC22 domain family, member 1 (TSC22D1), transcript variant 1, mRNA [NM_183422]	-0.610956	10.512	-5.30483	3.15166e-05	0.00381379
8760	7934	A_23_P68824	SMARCB1	NM_003073	Homo sapiens SWI/SNF related, matrix associated, actin dependent regulator of chromatin, subfamily b, member 1 (SMARCB1), transcript variant 1, mRNA [NM_003073]	-0.506542	8.23194	-5.30995	3.11466e-05	0.00381379
26487	24194	A_24_P302898	BAP1	NM_004656	Homo sapiens BRCA1 associated protein-1 (ubiquitin carboxy-terminal hydrolase) (BAP1), mRNA [NM_004656]	-0.467298	9.05754	-5.30542	3.14743e-05	0.00381379
12426	11376	A_24_P149766	WDR32	NM_024345	Homo sapiens WD repeat domain 32 (WDR32), mRNA [NM_024345]	-0.858704	9.04438	-5.2697	3.41782e-05	0.00381683
22905	20908	A_24_P594293	A_24_P594293	A_24_P594293	Unknown	-0.763252	10.8349	-5.29074	3.25582e-05	0.00381683
33637	30764	A_23_P66715	PIGS	NM_033198	Homo sapiens phosphatidylinositol glycan anchor biosynthesis, class S (PIGS), mRNA [NM_033198]	-0.689804	8.62625	-5.26554	3.45082e-05	0.00381683
25312	23132	A_23_P214091	LYPLA1	NM_006330	Homo sapiens lysophospholipase I (LYPLA1), mRNA [NM_006330]	-0.648374	10.5144	-5.27557	3.37182e-05	0.00381683
10945	10070	A_23_P165280	POLR2E	NM_002695	Homo sapiens polymerase (RNA) II (DNA directed) polypeptide E, 25kDa (POLR2E), mRNA [NM_002695]	-0.588125	10.4271	-5.28829	3.27424e-05	0.00381683
43990	40128	A_23_P11244	PJA1	NM_145119	Homo sapiens praja 1 (PJA1), transcript variant 1, mRNA [NM_145119]	-0.51736	11.2848	-5.26609	3.4464e-05	0.00381683
18278	12131	A_23_P37910	MAPK3	NM_002746	Homo sapiens mitogen-activated protein kinase 3 (MAPK3), transcript variant 1, mRNA [NM_002746]	-0.481726	8.73353	-5.29248	3.24271e-05	0.00381683
13355	12151	A_24_P850428	ENST00000361461	ENST00000361461	Homo sapiens cDNA clone IMAGE:30318308, partial cds. [BC070327]	-0.466621	13.239	-5.27088	3.40852e-05	0.00381683
9854	9012	A_23_P254091	KIF2	NM_004520	Homo sapiens kinesin heavy chain member 2 (KIF2), mRNA [NM_004520]	-0.451956	10.1625	-5.27539	3.37322e-05	0.00381683
8654	7895	A_23_P67648	CAPNS1	NM_001749	Homo sapiens calpain, small subunit 1 (CAPNS1), transcript variant 1, mRNA [NM_001749]	-0.450686	12.4797	-5.29617	3.21528e-05	0.00381683
16827	15384	A_23_P94857	MAN1B1	NM_016219	Homo sapiens mannosidase, alpha, class 1B, member 1 (MAN1B1), mRNA [NM_016219]	-0.449437	10.9839	-5.26389	3.46396e-05	0.00381683
38253	35012	A_23_P104295	FBXW4	NM_022039	Homo sapiens F-box and WD-40 domain protein 4 (FBXW4), mRNA [NM_022039]	-0.442322	9.75343	-5.27163	3.40261e-05	0.00381683
20647	18937	A_24_P207091	RBM23	NM_018107	Homo sapiens RNA binding motif protein 23 (RBM23), mRNA [NM_018107]	-0.420276	9.59963	-5.33699	3.44466e-05	0.00381683
3390	2984	A_23_P130648	GIPC1	NM_005716	Homo sapiens GIPC PDZ domain containing family, member 1 (GIPC1), transcript variant 1, mRNA [NM_005716]	-0.4152	10.2659	-5.26573	3.44927e-05	0.00381683
1438	1263	A_23_P131771	TPD52L2	NM_199360	Homo sapiens tumor protein D52-like 2 (TPD52L2), transcript variant 1, mRNA [NM_199360]	-0.402987	8.65023	-5.28795	3.2768e-05	0.00381683
5956	5421	A_23_P218726	CPNE1	NM_152930	Homo sapiens copine I (CPNE1), transcript variant 7, mRNA [NM_152930]	-0.388572	9.7628	-5.27054	3.41122e-05	0.00381683
36078	33051	A_24_P928798	AK056260	AK056260	Homo sapiens cDNA FLJ31698 fis, clone NT2RI2005966. [AK056260]	-0.371472	10.349	-5.29659	3.21213e-05	0.00381683
22435	20513	A_23_P15375	ARMC7	NM_024585	Homo sapiens armadillo repeat containing 7 (ARMC7), mRNA [NM_024585]	-0.361899	9.73889	-5.2862	3.29011e-05	0.00381683
33518	30702	A_23_P29347	MAPK12	NM_002969	Homo sapiens mitogen-activated protein kinase 12 (MAPK12), mRNA [NM_002969]	-0.328995	6.98262	-5.27198	3.39986e-05	0.00381683
33731	30932	A_23_P48910	STOML1	NM_004809	Homo sapiens stomatin (EPB72)-like 1 (STOML1), mRNA [NM_004809]	-0.307603	7.38915	-5.27375	3.38601e-05	0.00381683
27435	25165	A_23_P20196	ARPC1B	NM_005720	Homo sapiens actin related protein 2/3 complex, subunit 1B, 41kDa (ARPC1B), mRNA [NM_005720]	-0.542368	12.5771	-5.25968	3.49785e-05	0.00382309
30778	28170	A_23_P95027	ANKRD39	NM_016466	Homo sapiens ankyrin repeat domain 39 (ANKRD39), mRNA [NM_016466]	-0.297512	9.10478	-5.26027	3.49304e-05	0.00382309
22946	20981	A_24_P251534	CTDSPL	NM_001008392	Homo sapiens CTD (carboxy-terminal domain, RNA polymerase II, polypeptide A) small phosphatase-like (CTDSPL), transcript variant 1, mRNA [NM_001008392]	-0.30715	9.74042	-5.25785	3.51264e-05	0.00382384
5291	4810	A_23_P250035	SDHA	NM_004168	Homo sapiens succinate dehydrogenase complex, subunit A, flavoprotein (Fp) (SDHA), nuclear gene encoding mitochondrial protein, mRNA [NM_004168]	-0.758	10.8842	-5.24681	3.60343e-05	0.00387515
31417	28724	A_24_P389038	WDR46	NM_005452	Homo sapiens WD repeat domain 46 (WDR46), mRNA [NM_005452]	-0.419172	9.61148	-5.24348	3.63126e-05	0.00387515
18066	16564	A_23_P155351	BTD	NM_000060	Homo sapiens biotinidase (BTD), mRNA [NM_000060]	-0.531496	7.20034	-5.23796	3.67788e-05	0.00389425
1365	1119	A_24_P152793	A_24_P152793	A_24_P152793	Unknown	-1.01368	12.7643	-5.23052	3.74174e-05	0.00392762
21509	19593	A_23_P89113	FLJ14154	NM_024845	Homo sapiens hypothetical protein FLJ14154 (FLJ14154), mRNA [NM_024845]	-0.492379	8.19289	-5.22923	3.75287e-05	0.00392762
3687	3226	A_24_P376483	HLA-A	NM_002116	Homo sapiens major histocompatibility complex, class I, A (HLA-A), mRNA [NM_002116]	-0.707749	13.5859	-5.19024	4.1073e-05	0.00394749
35732	32731	A_23_P203488	SMPD1	NM_000543	Homo sapiens sphingomyelin phosphodiesterase 1, acid lysosomal (acid sphingomyelinase) (SMPD1), transcript variant 1, mRNA [NM_000543]	-0.651582	8.76986	-5.22495	3.79028e-05	0.00394749
37200	34008	A_24_P50639	A_24_P50639	A_24_P50639	Unknown	-0.641282	9.97341	-5.21585	3.87092e-05	0.00394749
18996	17336	A_23_P61531	GLB1	NM_000404	Homo sapiens galactosidase, beta 1 (GLB1), transcript variant 179423, mRNA [NM_000404]	-0.62534	10.14	-5.21106	3.91402e-05	0.00394749
25021	22909	A_23_P325080	PTOV1	NM_017432	Homo sapiens prostate tumor overexpressed gene 1 (PTOV1), mRNA [NM_017432]	-0.604922	9.26043	-5.21201	3.90544e-05	0.00394749
361	282	A_23_P321959	SFT2D1	NM_145169	Homo sapiens SFT2 domain containing 1 (SFT2D1), mRNA [NM_145169]	-0.580618	11.659	-5.2145	3.88299e-05	0.00394749
9487	8648	A_23_P158533	DEAF1	NM_021008	Homo sapiens deformed epidermal autoregulatory factor 1 (Drosophila) (DEAF1), mRNA [NM_021008]	-0.575286	9.50202	-5.20378	3.98053e-05	0.00394749
25457	23237	A_23_P92140	MYD88	NM_002468	Homo sapiens myeloid differentiation primary response gene (88) (MYD88), mRNA [NM_002468]	-0.557142	7.56678	-5.20377	3.98066e-05	0.00394749
16870	15461	A_24_P718973	C1orf122	NM_198446	Homo sapiens chromosome 1 open reading frame 122 (C1orf122), mRNA [NM_198446]	-0.51832	12.8724	-5.188	4.12871e-05	0.00394749
41156	37661	A_24_P164731	TMED1	NM_006858	Homo sapiens transmembrane emp24 protein transport domain containing 1 (TMED1), mRNA [NM_006858]	-0.510612	9.2531	-5.20558	3.96401e-05	0.00394749
42607	38919	A_24_P399585	SGTA	NM_003021	Homo sapiens small glutamine-rich tetratricopeptide repeat (TPR)-containing, alpha (SGTA), mRNA [NM_003021]	-0.490723	7.99283	-5.20892	3.93352e-05	0.00394749
20368	18588	A_23_P143580	KLHL22	NM_032775	Homo sapiens kelch-like 22 (Drosophila) (KLHL22), mRNA [NM_032775]	-0.480157	7.45527	-5.19929	4.02213e-05	0.00394749
26848	24544	A_23_P117778	UBL7	NM_032907	Homo sapiens ubiquitin-like 7 (bone marrow stromal cell-derived) (UBL7), transcript variant 1, mRNA [NM_032907]	-0.463576	8.56734	-5.19924	4.02264e-05	0.00394749
12840	11662	A_24_P240065	VPS24	NM_016079	Homo sapiens vacuolar protein sorting 24 homolog (S. cerevisiae) (VPS24), transcript variant 1, mRNA [NM_016079]	-0.461795	11.6616	-5.20253	3.99208e-05	0.00394749
35628	32544	A_23_P386905	UBXD1	NM_025241	Homo sapiens UBX domain containing 1 (UBXD1), mRNA [NM_025241]	-0.443268	10.6232	-5.19536	4.0589e-05	0.00394749
15389	13992	A_23_P111835	DLD	NM_000108	Homo sapiens dihydrolipoamide dehydrogenase (DLD), mRNA [NM_000108]	-0.437255	11.9262	-5.19151	4.09527e-05	0.00394749
15497	14186	A_23_P252603	SHFM3P1	AF174606	Homo sapiens F-box protein Fbw3 (FBW3) mRNA, complete cds. [AF174606]	-0.417385	9.0388	-5.19225	4.08827e-05	0.00394749
36164	33054	A_23_P79794	TGIF2	NM_021809	Homo sapiens TGFB-induced factor 2 (TALE family homeobox) (TGIF2), mRNA [NM_021809]	-0.397704	7.88453	-5.19121	4.09809e-05	0.00394749
10521	9608	A_23_P91727	PICK1	NM_012407	Homo sapiens protein interacting with PRKCA 1 (PICK1), transcript variant 1, mRNA [NM_012407]	-0.394098	7.39515	-5.19068	4.10312e-05	0.00394749
36699	33557	A_23_P126790	SARS	NM_006513	Homo sapiens seryl-tRNA synthetase (SARS), mRNA [NM_006513]	-0.387482	11.998	-5.21145	3.91054e-05	0.00394749
22134	20270	A_23_P119214	TIMM44	NM_006351	Homo sapiens translocase of inner mitochondrial membrane 44 homolog (yeast) (TIMM44), mRNA [NM_006351]	-0.38108	9.71024	-5.21955	3.83788e-05	0.00394749
6085	5504	A_23_P140088	DLEU8	NM_024570	Homo sapiens deleted in lymphocytic leukemia 8 (DLEU8), mRNA [NM_024570]	-0.357701	9.21826	-5.21116	3.91316e-05	0.00394749
16390	15041	A_23_P145289	GNL1	NM_005275	Homo sapiens guanine nucleotide binding protein-like 1 (GNL1), mRNA [NM_005275]	-0.333087	10.552	-5.2197	3.83656e-05	0.00394749
41815	38250	A_23_P61646	STX4	NM_004604	Homo sapiens syntaxin 4 (STX4), mRNA [NM_004604]	-0.287911	10.534	-5.19076	4.10244e-05	0.00394749
21917	20025	A_24_P161604	LOC654152	XM_940047	PREDICTED: Homo sapiens similar to ribosomal protein L21 isoform 1 (LOC654152), mRNA [XM_940047]	-0.574255	14.2922	-5.18085	4.19764e-05	0.00399232
10596	9747	A_24_P823684	HSP90AB1	NM_007355	Homo sapiens heat shock protein 90kDa alpha (cytosolic), class B member 1 (HSP90AB1), mRNA [NM_007355]	-0.723581	11.4549	-5.1764	4.24113e-05	0.00400558
10559	9678	A_24_P144134	A_24_P144134	A_24_P144134	Unknown	-0.40235	9.28935	-5.17741	4.23122e-05	0.00400558
19558	17896	A_24_P238286	A_24_P238286	A_24_P238286	Unknown	-0.455273	8.01011	-5.17361	4.26866e-05	0.00401758
10055	9222	A_24_P340916	A_24_P340916	A_24_P340916	Unknown	-0.404356	8.00718	-5.17124	4.29222e-05	0.00402578
17920	16450	A_23_P365149	BCKDK	NM_005881	Homo sapiens branched chain ketoacid dehydrogenase kinase (BCKDK), mRNA [NM_005881]	-0.536278	9.66941	-5.16597	4.34498e-05	0.00404726
25846	23645	A_24_P64167	PTGS1	NM_000962	Homo sapiens prostaglandin-endoperoxide synthase 1 (prostaglandin G/H synthase and cyclooxygenase) (PTGS1), transcript variant 1, mRNA [NM_000962]	-0.479624	7.81361	-5.16703	4.33426e-05	0.00404726
28943	26531	A_23_P155624	AP2M1	NM_004068	Homo sapiens adaptor-related protein complex 2, mu 1 subunit (AP2M1), transcript variant 1, mRNA [NM_004068]	-0.684196	11.385	-5.15332	4.47427e-05	0.00405617
12507	11370	A_24_P229766	A_24_P229766	A_24_P229766	Unknown	-0.638903	9.09948	-5.15609	4.44564e-05	0.00405617
4883	4361	A_24_P913339	C2orf18	NM_017877	Homo sapiens chromosome 2 open reading frame 18 (C2orf18), mRNA [NM_017877]	-0.530927	10.31	-5.15992	4.40633e-05	0.00405617
35914	32906	A_23_P152620	TNFSF13	NM_172088	Homo sapiens tumor necrosis factor (ligand) superfamily, member 13 (TNFSF13), transcript variant gamma, mRNA [NM_172088]	-0.50237	8.99764	-5.15471	4.45993e-05	0.00405617
17597	16014	A_23_P414273	MST150	NM_032947	Homo sapiens MSTP150 (MST150), mRNA [NM_032947]	-0.480785	11.0378	-5.1594	4.41163e-05	0.00405617
5119	4648	A_23_P148150	COBRA1	NM_015456	Homo sapiens cofactor of BRCA1 (COBRA1), mRNA [NM_015456]	-0.334035	11.2992	-5.1563	4.44349e-05	0.00405617
44482	40498	A_23_P393607	C1orf142	NM_053052	Homo sapiens chromosome 1 open reading frame 142 (C1orf142), mRNA [NM_053052]	-0.315157	12.2355	-5.16305	4.37452e-05	0.00405617
24824	22710	A_24_P737939	C6orf154	NM_001012974	Homo sapiens chromosome 6 open reading frame 154 (C6orf154), mRNA [NM_001012974]	-0.565202	8.9146	-5.14758	4.5343e-05	0.00406976
23383	21321	A_23_P200535	TRAPPC3	NM_014408	Homo sapiens trafficking protein particle complex 3 (TRAPPC3), mRNA [NM_014408]	-0.538311	11.106	-5.14919	4.51738e-05	0.00406976
32878	30159	A_24_P568645	A_24_P568645	A_24_P568645	Unknown	-0.687765	9.40182	-5.14297	4.583e-05	0.0040959
37725	34500	A_23_P156697	BAT5	NM_021160	Homo sapiens HLA-B associated transcript 5 (BAT5), mRNA [NM_021160]	-0.359528	9.45396	-5.14197	4.59364e-05	0.0040959
24898	22844	A_32_P110751	EIF4A2	NM_001967	Homo sapiens eukaryotic translation initiation factor 4A, isoform 2 (EIF4A2), mRNA [NM_001967]	-0.546462	10.435	-5.13432	4.67591e-05	0.00415001
2868	2477	A_23_P39088	PRMT1	NM_198319	Homo sapiens protein arginine methyltransferase 1 (PRMT1), transcript variant 2, mRNA [NM_198319]	-0.442597	11.4282	-5.13349	4.68495e-05	0.00415001
17371	15907	A_24_P257971	SLC27A4	NM_005094	Homo sapiens solute carrier family 27 (fatty acid transporter), member 4 (SLC27A4), mRNA [NM_005094]	-0.551606	7.92671	-5.12534	4.77442e-05	0.0041614
33274	30413	A_23_P88848	DUS2L	NM_017803	Homo sapiens dihydrouridine synthase 2-like, SMM1 homolog (S. cerevisiae) (DUS2L), mRNA [NM_017803]	-0.439362	7.85114	-5.12596	4.7676e-05	0.0041614
38106	34894	A_24_P720202	WBSCR1	NM_022170	Homo sapiens Williams-Beuren syndrome chromosome region 1 (WBSCR1), transcript variant 1, mRNA [NM_022170]	-0.735068	10.5256	-5.11912	4.8439e-05	0.00418024
41744	38114	A_24_P392790	A_24_P392790	A_24_P392790	Unknown	-0.450596	12.026	-5.11788	4.85787e-05	0.00418024
26044	23850	A_23_P216739	SURF6	NM_006753	Homo sapiens surfeit 6 (SURF6), mRNA [NM_006753]	-0.421759	9.31565	-5.11911	4.84399e-05	0.00418024
18520	16924	A_24_P41160	ENST00000309004	ENST00000309004	PREDICTED: Homo sapiens similar to ribosomal protein L21 isoform 1 (LOC388621), mRNA [XM_371243]	-0.581039	14.1766	-5.10105	5.05164e-05	0.00427906
44774	40826	A_23_P49351	AMDHD2	NM_015944	Homo sapiens amidohydrolase domain containing 2 (AMDHD2), mRNA [NM_015944]	-0.532379	7.72502	-5.10321	5.02624e-05	0.00427906
15892	14601	A_23_P9435	SLC25A25	NM_001006641	Homo sapiens solute carrier family 25 (mitochondrial carrier; phosphate carrier), member 25 (SLC25A25), nuclear gene encoding mitochondrial protein, transcript variant 2, mRNA [NM_001006641]	-0.512166	7.84316	-5.09854	5.0812e-05	0.00429069
36218	33148	A_24_P180225	HD	NM_002111	Homo sapiens huntingtin (Huntington disease) (HD), mRNA [NM_002111]	-0.331252	10.216	-5.09483	5.12517e-05	0.00429086
16050	14734	A_23_P41872	B4GALT7	NM_007255	Homo sapiens xylosylprotein beta 1,4-galactosyltransferase, polypeptide 7 (galactosyltransferase I) (B4GALT7), mRNA [NM_007255]	-0.280194	9.26703	-5.09452	5.12889e-05	0.00429086
12531	11416	A_23_P50241	CLPTM1	NM_001294	Homo sapiens cleft lip and palate associated transmembrane protein 1 (CLPTM1), mRNA [NM_001294]	-0.586715	8.40703	-5.0851	5.24245e-05	0.00429311
45171	41020	A_23_P137391	ENO1	NM_001428	Homo sapiens enolase 1, (alpha) (ENO1), mRNA [NM_001428]	-0.584431	12.9586	-5.09	5.18296e-05	0.00429311
37625	34470	A_24_P332364	A_24_P332364	A_24_P332364	Unknown	-0.411677	7.08333	-5.08759	5.21207e-05	0.00429311
33386	30616	A_23_P57643	GPR175	NM_016372	Homo sapiens G protein-coupled receptor 175 (GPR175), mRNA [NM_016372]	-0.286839	8.86978	-5.0929	5.14818e-05	0.00429311
42313	38699	A_23_P142022	PRPF31	NM_015629	Homo sapiens PRP31 pre-mRNA processing factor 31 homolog (S. cerevisiae) (PRPF31), mRNA [NM_015629]	-0.405599	10.3251	-5.08278	5.27072e-05	0.00430325
35043	32086	A_23_P30848	HLA-E	NM_005516	Homo sapiens major histocompatibility complex, class I, E (HLA-E), mRNA [NM_005516]	-0.731467	13.6492	-5.07729	5.33851e-05	0.00431957
2599	2289	A_23_P200598	C1orf166	NM_024544	Homo sapiens chromosome 1 open reading frame 166 (C1orf166), mRNA [NM_024544]	-0.458523	10.2835	-5.07888	5.3188e-05	0.00431957
7344	6729	A_23_P77066	SNRPN	NM_022807	Homo sapiens small nuclear ribonucleoprotein polypeptide N (SNRPN), transcript variant 4, mRNA [NM_022807]	-0.462553	9.27269	-5.07369	5.38334e-05	0.00432321
40039	36555	A_23_P402157	KCTD17	NM_024681	Homo sapiens potassium channel tetramerisation domain containing 17 (KCTD17), mRNA [NM_024681]	-0.24539	7.7636	-5.07181	5.40694e-05	0.00432321
45110	41065	A_24_P84873	A_24_P84873	A_24_P84873	Unknown	-0.594206	10.682	-5.06551	5.48682e-05	0.00435859
15520	14228	A_23_P131778	MANBAL	NM_022077	Homo sapiens mannosidase, beta A, lysosomal-like (MANBAL), transcript variant 1, mRNA [NM_022077]	-0.346703	10.4991	-5.06453	5.4993e-05	0.00435859
44837	40788	A_24_P66270	LOC653639	XM_934787	PREDICTED: Homo sapiens similar to Acyl-protein thioesterase 2 (Lysophospholipase II) (LPL-I), transcript variant 3 (LOC653639), mRNA [XM_934787]	-0.353658	8.89768	-5.06234	5.52741e-05	0.0043681
31778	29079	A_24_P854199	PHB	NM_002634	Homo sapiens prohibitin (PHB), mRNA [NM_002634]	-0.65362	10.4226	-5.06032	5.55342e-05	0.00437348
19897	18210	A_32_P456537	TCP1	NM_030752	Homo sapiens t-complex 1 (TCP1), transcript variant 1, mRNA [NM_030752]	-0.567989	9.80482	-5.05931	5.56648e-05	0.00437348
6182	5683	A_23_P64954	USP5	NM_003481	Homo sapiens ubiquitin specific peptidase 5 (isopeptidase T) (USP5), mRNA [NM_003481]	-0.606111	9.04458	-5.05737	5.59169e-05	0.00438059
8174	7479	A_23_P155103	ADSL	NM_000026	Homo sapiens adenylosuccinate lyase (ADSL), mRNA [NM_000026]	-0.528823	9.86011	-5.05186	5.66383e-05	0.00439896
34361	31464	A_23_P503233	EDARADD	NM_080738	Homo sapiens EDAR-associated death domain (EDARADD), transcript variant B, mRNA [NM_080738]	-0.489363	12.6033	-5.05227	5.65853e-05	0.00439896
28746	26328	A_24_P853004	A_24_P853004	A_24_P853004	Unknown	-0.494638	8.95201	-5.04777	5.71802e-05	0.00442836
44234	40379	A_23_P34644	FCGR2B	NM_004001	Homo sapiens Fc fragment of IgG, low affinity IIb, receptor (CD32) (FCGR2B), transcript variant 1, mRNA [NM_004001]	-0.606026	8.43823	-5.04493	5.75603e-05	0.00443247
32812	30038	A_23_P251548	TEX261	NM_144582	Homo sapiens testis expressed sequence 261 (TEX261), mRNA [NM_144582]	-0.554805	8.70469	-5.03435	5.89955e-05	0.00445467
27525	25176	A_24_P389218	ARHGEF5	NM_005435	Homo sapiens Rho guanine nucleotide exchange factor (GEF) 5 (ARHGEF5), mRNA [NM_005435]	-0.541261	8.5851	-5.03633	5.87236e-05	0.00445467
1132	865	A_24_P407717	GRB2	NM_002086	Homo sapiens growth factor receptor-bound protein 2 (GRB2), transcript variant 1, mRNA [NM_002086]	-0.534305	10.9544	-5.03492	5.8918e-05	0.00445467
7771	7051	A_24_P43092	2002-09-01	NM_001008491	Homo sapiens septin 2 (SEPT2), transcript variant 1, mRNA [NM_001008491]	-0.422706	8.3492	-5.03658	5.86894e-05	0.00445467
11100	10200	A_32_P25176	FLJ42953	NM_207474	Homo sapiens FLJ42953 protein (FLJ42953), mRNA [NM_207474]	-0.385023	9.49321	-5.03452	5.89729e-05	0.00445467
12788	11721	A_23_P102454	INSIG2	NM_016133	Homo sapiens insulin induced gene 2 (INSIG2), mRNA [NM_016133]	-0.603195	9.0666	-5.02979	5.96258e-05	0.00446718
22585	20632	A_24_P364954	FLJ22222	NM_024648	Homo sapiens hypothetical protein FLJ22222 (FLJ22222), transcript variant 1, mRNA [NM_024648]	-0.546676	8.83563	-5.02741	5.9957e-05	0.00446718
37201	34009	A_24_P290293	ENST00000332289	ENST00000332289	PREDICTED: Homo sapiens similar to laminin receptor 1 (ribosomal protein SA) (LOC441506), mRNA [XM_497133]	-0.447143	13.7797	-5.03051	5.95262e-05	0.00446718
43543	39807	A_23_P28878	C20orf27	NM_001039140	Homo sapiens chromosome 20 open reading frame 27 (C20orf27), mRNA [NM_001039140]	-0.432098	7.69371	-5.02804	5.98695e-05	0.00446718
10712	9802	A_24_P221903	C21orf30	AL117578	Homo sapiens mRNA; cDNA DKFZp434C128 (from clone DKFZp434C128). [AL117578]	-0.484125	6.851	-5.0229	6.05905e-05	0.00448734
15593	14207	A_23_P3169	GMPR2	NM_001002000	Homo sapiens guanosine monophosphate reductase 2 (GMPR2), transcript variant 2, mRNA [NM_001002000]	-0.598641	8.50761	-5.01821	6.12562e-05	0.0045096
26509	24235	A_24_P306614	A_24_P306614	A_24_P306614	Unknown	-0.463136	10.455	-5.01727	6.13902e-05	0.0045096
27492	25113	A_32_P820503	FTH1	NM_002032	Homo sapiens ferritin, heavy polypeptide 1 (FTH1), mRNA [NM_002032]	-0.51539	14.9921	-5.01468	6.17624e-05	0.00452468
19598	17969	A_23_P57497	MYH9	NM_002473	Homo sapiens myosin, heavy polypeptide 9, non-muscle (MYH9), mRNA [NM_002473]	-0.642505	11.0472	-5.00472	6.32133e-05	0.00456694
39066	35719	A_24_P251899	CSNK1A1	NM_001892	Homo sapiens casein kinase 1, alpha 1 (CSNK1A1), transcript variant 2, mRNA [NM_001892]	-0.566483	11.2174	-5.00839	6.26745e-05	0.00456694
14669	13466	A_23_P394304	PDZK1IP1	NM_005764	Homo sapiens PDZK1 interacting protein 1 (PDZK1IP1), mRNA [NM_005764]	-0.527391	9.19014	-5.00337	6.34127e-05	0.00456694
19683	17970	A_23_P39110	RUVBL2	NM_006666	Homo sapiens RuvB-like 2 (E. coli) (RUVBL2), mRNA [NM_006666]	-0.48295	10.9548	-5.00763	6.27854e-05	0.00456694
31507	28893	A_23_P354027	KCTD11	NM_001002914	Homo sapiens potassium channel tetramerisation domain containing 11 (KCTD11), mRNA [NM_001002914]	-0.413123	10.1903	-5.0044	6.32607e-05	0.00456694
32964	30162	A_24_P212565	LOC651831	XM_941086	PREDICTED: Homo sapiens similar to CG31232-PA, isoform A (LOC651831), mRNA [XM_941086]	-0.402698	8.14739	-5.00265	6.35186e-05	0.00456694
42140	38538	A_24_P316489	NDUFA10	NM_004544	Homo sapiens NADH dehydrogenase (ubiquinone) 1 alpha subcomplex, 10, 42kDa (NDUFA10), nuclear gene encoding mitochondrial protein, mRNA [NM_004544]	-0.803904	8.71014	-5.0008	6.37929e-05	0.00457442
23183	21262	A_23_P128036	MARS	NM_004990	Homo sapiens methionine-tRNA synthetase (MARS), mRNA [NM_004990]	-0.617229	8.75575	-4.99406	6.48044e-05	0.00459694
34914	32009	A_23_P111635	STYXL1	NM_016086	Homo sapiens serine/threonine/tyrosine interacting-like 1 (STYXL1), mRNA [NM_016086]	-0.591381	9.79072	-4.99519	6.4633e-05	0.00459694
18162	16584	A_24_P393461	C1orf43	NM_138740	Homo sapiens chromosome 1 open reading frame 43 (C1orf43), transcript variant 2, mRNA [NM_138740]	-0.72893	11.4173	-4.97196	6.8232e-05	0.00459887
33034	30284	A_24_P101771	A_24_P101771	A_24_P101771	Unknown	-0.640101	13.9765	-4.96502	6.93475e-05	0.00459887
35936	32949	A_23_P126623	PGD	NM_002631	Homo sapiens phosphogluconate dehydrogenase (PGD), mRNA [NM_002631]	-0.6201	10.7377	-4.96661	6.90906e-05	0.00459887
31711	1736	A_23_P212617	TFRC	NM_003234	Homo sapiens transferrin receptor (p90, CD71) (TFRC), mRNA [NM_003234]	-0.582299	11.0419	-5.03783	6.75396e-05	0.00459887
39267	35928	A_24_P835943	A_24_P835943	A_24_P835943	Unknown	-0.520233	8.1104	-4.97175	6.82665e-05	0.00459887
12140	11158	A_23_P38468	TAX1BP3	NM_014604	Homo sapiens Tax1 (human T-cell leukemia virus type I) binding protein 3 (TAX1BP3), mRNA [NM_014604]	-0.47012	8.95154	-4.98815	6.57033e-05	0.00459887
42987	39296	A_23_P165548	HS1BP3	NM_022460	Homo sapiens HS1-binding protein 3 (HS1BP3), mRNA [NM_022460]	-0.468965	8.96112	-4.96587	6.92097e-05	0.00459887
13937	12758	A_23_P423389	CREB3	NM_006368	Homo sapiens cAMP responsive element binding protein 3 (CREB3), mRNA [NM_006368]	-0.454334	10.2019	-4.98842	6.56619e-05	0.00459887
12041	10983	A_23_P106741	PSMD7	NM_002811	Homo sapiens proteasome (prosome, macropain) 26S subunit, non-ATPase, 7 (Mov34 homolog) (PSMD7), mRNA [NM_002811]	-0.448557	13.1702	-4.97187	6.82473e-05	0.00459887
18916	17344	A_23_P56734	HNMT	NM_006895	Homo sapiens histamine N-methyltransferase (HNMT), transcript variant 1, mRNA [NM_006895]	-0.444712	9.95211	-4.97002	6.85419e-05	0.00459887
2367	2017	A_24_P115971	RIC8A	NM_021932	Homo sapiens resistance to inhibitors of cholinesterase 8 homolog A (C. elegans) (RIC8A), mRNA [NM_021932]	-0.431905	10.9585	-4.98064	6.68649e-05	0.00459887
7698	7073	A_24_P40978	ENST00000292543	ENST00000292543	Homo sapiens mRNA for FLJ00352 protein. [AK160381]	-0.427361	9.01622	-4.97017	6.85179e-05	0.00459887
8866	8133	A_24_P75408	A_24_P75408	A_24_P75408	Unknown	-0.389805	7.65755	-4.9678	6.88982e-05	0.00459887
7032	6473	A_23_P17880	DNAL4	NM_005740	Homo sapiens dynein, axonemal, light polypeptide 4 (DNAL4), mRNA [NM_005740]	-0.370529	8.65115	-4.98032	6.69146e-05	0.00459887
23437	21427	A_24_P235131	TRIAD3	NM_207111	Homo sapiens TRIAD3 protein (TRIAD3), transcript variant 1, mRNA [NM_207111]	-0.353371	9.06227	-4.97548	6.76751e-05	0.00459887
10697	9777	A_23_P162970	IPO4	NM_024658	Homo sapiens importin 4 (IPO4), mRNA [NM_024658]	-0.322987	10.6066	-4.97566	6.76453e-05	0.00459887
246	259	A_23_P125771	HCFC1	NM_005334	Homo sapiens host cell factor C1 (VP16-accessory protein) (HCFC1), mRNA [NM_005334]	-0.309882	8.07945	-4.98547	6.6116e-05	0.00459887
33530	30726	A_23_P115683	HPS6	NM_024747	Homo sapiens Hermansky-Pudlak syndrome 6 (HPS6), mRNA [NM_024747]	-0.266186	12.9571	-4.96718	6.89979e-05	0.00459887
27703	25347	A_23_P118038	NUTF2	NM_005796	Homo sapiens nuclear transport factor 2 (NUTF2), mRNA [NM_005796]	-0.327097	11.0781	-4.95869	7.03788e-05	0.0046529
10383	9507	A_24_P24790	A_24_P24790	A_24_P24790	Unknown	-0.533411	15.0592	-4.95658	7.07269e-05	0.00466363
39698	36243	A_23_P91114	PREB	NM_013388	Homo sapiens prolactin regulatory element binding (PREB), mRNA [NM_013388]	-0.343804	11.2723	-4.95562	7.08853e-05	0.00466363
25027	22920	A_23_P171034	NSDHL	NM_015922	Homo sapiens NAD(P) dependent steroid dehydrogenase-like (NSDHL), mRNA [NM_015922]	-0.658847	7.75054	-4.94862	7.20544e-05	0.00472907
19015	17369	A_24_P846755	A_24_P846755	A_24_P846755	Unknown	-0.71204	8.18631	-4.94642	7.24246e-05	0.00473046
28226	25846	A_23_P361773	CCND3	NM_001760	Homo sapiens cyclin D3 (CCND3), mRNA [NM_001760]	-0.307362	10.131	-4.94718	7.22972e-05	0.00473046
20100	18410	A_32_P233019	SEC22A	NM_012430	Homo sapiens SEC22 vesicle trafficking protein homolog A (S. cerevisiae) (SEC22A), mRNA [NM_012430]	-0.542324	8.81988	-4.93967	7.35759e-05	0.00476215
13942	12767	A_24_P225339	MOBKL2C	NM_145279	Homo sapiens MOB1, Mps One Binder kinase activator-like 2C (yeast) (MOBKL2C), transcript variant 1, mRNA [NM_145279]	-0.337119	6.97395	-4.94114	7.33243e-05	0.00476215
4387	3908	A_24_P296520	UBE2G1	NM_003342	Homo sapiens ubiquitin-conjugating enzyme E2G 1 (UBC7 homolog, yeast) (UBE2G1), transcript variant 1, mRNA [NM_003342]	-0.328719	8.86997	-4.94238	7.3112e-05	0.00476215
19170	17500	A_23_P152272	RNPS1	NM_006711	Homo sapiens RNA binding protein S1, serine-rich domain (RNPS1), transcript variant 1, mRNA [NM_006711]	-0.42498	12.695	-4.93706	7.40265e-05	0.00477753
33986	31093	A_23_P357104	ANXA6	NM_001155	Homo sapiens annexin A6 (ANXA6), transcript variant 1, mRNA [NM_001155]	-0.358072	11.2638	-4.93533	7.43265e-05	0.0047855
37885	34644	A_23_P215265	GNA12	NM_007353	Homo sapiens guanine nucleotide binding protein (G protein) alpha 12 (GNA12), mRNA [NM_007353]	-0.399011	8.57773	-4.93147	7.5e-05	0.00479469
2912	2559	A_24_P43588	MAD2L1BP	NM_001003690	Homo sapiens MAD2L1 binding protein (MAD2L1BP), transcript variant 1, mRNA [NM_001003690]	-0.35241	11.1617	-4.93257	7.4807e-05	0.00479469
2991	2549	A_24_P379820	ITM2C	NM_030926	Homo sapiens integral membrane protein 2C (ITM2C), transcript variant 1, mRNA [NM_030926]	-0.712979	9.00546	-4.93004	7.52499e-05	0.00479595
20408	18659	A_24_P74753	ATP6AP1	NM_001183	Homo sapiens ATPase, H+ transporting, lysosomal accessory protein 1 (ATP6AP1), mRNA [NM_001183]	-0.654092	11.2955	-4.92438	7.62531e-05	0.00479595
2736	2387	A_23_P10699	ENST00000374274	ENST00000374274	full-length cDNA clone CS0DK008YO11 of HeLa cells Cot 25-normalized of Homo sapiens (human). [CR624966]	-0.634403	8.57055	-4.92284	7.65267e-05	0.00479595
8464	7698	A_23_P89798	FECH	NM_001012515	Homo sapiens ferrochelatase (protoporphyria) (FECH), nuclear gene encoding mitochondrial protein, transcript variant 1, mRNA [NM_001012515]	-0.513682	9.87312	-4.92609	7.59474e-05	0.00479595
4553	4064	A_23_P259823	FLJ20628	NM_017910	Homo sapiens hypothetical protein FLJ20628 (FLJ20628), mRNA [NM_017910]	-0.489103	7.61494	-4.92515	7.61155e-05	0.00479595
34298	31348	A_23_P39131	GLTSCR2	NM_015710	Homo sapiens glioma tumor suppressor candidate region gene 2 (GLTSCR2), mRNA [NM_015710]	-0.479995	11.4721	-4.92707	7.57747e-05	0.00479595
30556	27914	A_23_P131417	HDLBP	NM_005336	Homo sapiens high density lipoprotein binding protein (vigilin) (HDLBP), mRNA [NM_005336]	-0.409484	12.9507	-4.92039	7.69659e-05	0.00479595
30934	28307	A_24_P150931	NXPH3	NM_007225	Homo sapiens neurexophilin 3 (NXPH3), mRNA [NM_007225]	-0.359322	7.34522	-4.92066	7.69178e-05	0.00479595
44364	40459	A_32_P507710	LOC375133	NM_199345	Homo sapiens similar to phosphatidylinositol 4-kinase alpha (LOC375133), mRNA [NM_199345]	-0.281976	7.76154	-4.92062	7.69252e-05	0.00479595
28616	26244	A_23_P166135	XRN2	NM_012255	Homo sapiens 5'-3' exoribonuclease 2 (XRN2), mRNA [NM_012255]	-0.528457	10.1754	-4.91806	7.73875e-05	0.00481116
36420	33362	A_24_P65803	C20orf20	NM_018270	Homo sapiens chromosome 20 open reading frame 20 (C20orf20), mRNA [NM_018270]	-0.286785	8.04161	-4.91551	7.78495e-05	0.00481778
37989	34834	A_24_P242688	HADHA	NM_000182	Homo sapiens hydroxyacyl-Coenzyme A dehydrogenase/3-ketoacyl-Coenzyme A thiolase/enoyl-Coenzyme A hydratase (trifunctional protein), alpha subunit (HADHA), nuclear gene encoding mitochondrial protein, mRNA [NM_000182]	-0.549658	10.9895	-4.91338	7.82381e-05	0.00482374
8420	7622	A_23_P434421	C10orf9	NM_181698	Homo sapiens chromosome 10 open reading frame 9 (C10orf9), transcript variant 2, mRNA [NM_181698]	-0.482164	8.8475	-4.91303	7.83017e-05	0.00482374
11497	10459	A_24_P115183	CLDN4	NM_001305	Homo sapiens claudin 4 (CLDN4), mRNA [NM_001305]	-0.86607	10.1192	-4.90591	7.96166e-05	0.00484489
15410	14029	A_23_P138835	CAPN1	NM_005186	Homo sapiens calpain 1, (mu/I) large subunit (CAPN1), mRNA [NM_005186]	-0.675761	10.2054	-4.89845	8.10175e-05	0.00484489
33620	30736	A_24_P121535	ACTC	NM_005159	Homo sapiens actin, alpha, cardiac muscle (ACTC), mRNA [NM_005159]	-0.634893	11.9306	-4.89864	8.09816e-05	0.00484489
21037	19183	A_32_P95223	LOC619190	BC050292	Homo sapiens MGC44478, mRNA (cDNA clone MGC:44478 IMAGE:5298330), complete cds. [BC050292]	-0.584684	10.928	-4.90885	7.90714e-05	0.00484489
40144	36739	A_23_P139998	PHGDHL1	NM_177967	Homo sapiens phosphoglycerate dehydrogenase like 1 (PHGDHL1), mRNA [NM_177967]	-0.458075	10.2651	-4.89863	8.09837e-05	0.00484489
15530	14245	A_24_P256050	A_24_P256050	A_24_P256050	Unknown	-0.445183	7.39531	-4.9056	7.96741e-05	0.00484489
39208	35824	A_23_P305016	TADA3L	NM_006354	Homo sapiens transcriptional adaptor 3 (NGG1 homolog, yeast)-like (TADA3L), transcript variant 1, mRNA [NM_006354]	-0.362323	9.96721	-4.89961	8.07984e-05	0.00484489
20833	18966	A_23_P39336	FKBP8	NM_012181	Homo sapiens FK506 binding protein 8, 38kDa (FKBP8), mRNA [NM_012181]	-0.343971	7.37366	-4.90091	8.05536e-05	0.00484489
9719	8917	A_24_P873414	CR603184	CR603184	full-length cDNA clone CS0DM012YE16 of Fetal liver of Homo sapiens (human). [CR603184]	-0.303201	11.8648	-4.90042	8.06468e-05	0.00484489
1573	1344	A_23_P2960	AKT1	NM_005163	Homo sapiens v-akt murine thymoma viral oncogene homolog 1 (AKT1), transcript variant 1, mRNA [NM_005163]	-0.513524	8.49346	-4.89143	8.23597e-05	0.00488499
36087	33067	A_23_P144113	GNAI2	NM_002070	Homo sapiens guanine nucleotide binding protein (G protein), alpha inhibiting activity polypeptide 2 (GNAI2), mRNA [NM_002070]	-0.701381	9.19482	-4.88766	8.30885e-05	0.00490675
33455	30587	A_23_P136173	CSF2RA	NM_172247	Homo sapiens colony stimulating factor 2 receptor, alpha, low-affinity (granulocyte-macrophage) (CSF2RA), transcript variant 4, mRNA [NM_172247]	-0.571786	7.6194	-4.88773	8.30763e-05	0.00490675
18870	17263	A_23_P362824	CSTF1	NM_001324	Homo sapiens cleavage stimulation factor, 3' pre-RNA, subunit 1, 50kDa (CSTF1), transcript variant 2, mRNA [NM_001324]	-0.259544	11.0642	-4.88629	8.33565e-05	0.00491187
34856	31904	A_24_P41890	A_24_P41890	A_24_P41890	Unknown	-0.82212	10.4735	-4.88391	8.38217e-05	0.00492857
16514	15114	A_23_P250866	TSC22D4	NM_030935	Homo sapiens TSC22 domain family, member 4 (TSC22D4), mRNA [NM_030935]	-0.426442	9.21142	-4.87788	8.50129e-05	0.00496629
9613	8723	A_24_P904903	BAT1	NM_004640	Homo sapiens HLA-B associated transcript 1 (BAT1), transcript variant 1, mRNA [NM_004640]	-0.610489	8.71422	-4.87539	8.55089e-05	0.00498453
34156	31246	A_23_P153853	ECH1	NM_001398	Homo sapiens enoyl Coenzyme A hydratase 1, peroxisomal (ECH1), mRNA [NM_001398]	-0.635623	10.9595	-4.87216	8.61586e-05	0.00501162
13656	12544	A_23_P67913	GMPPA	NM_013335	Homo sapiens GDP-mannose pyrophosphorylase A (GMPPA), transcript variant 1, mRNA [NM_013335]	-0.473502	7.42362	-4.86891	8.68173e-05	0.00502689
28400	26003	A_23_P165442	NRBP1	NM_013392	Homo sapiens nuclear receptor binding protein 1 (NRBP1), mRNA [NM_013392]	-0.338474	11.439	-4.86812	8.69774e-05	0.00502689
14034	12781	A_24_P263767	ENST00000376793	ENST00000376793	GB|M80470.1|AAA66955.1 MHC class I HLA-J antigen [NP111779]	-0.731952	12.6106	-4.85927	8.8799e-05	0.00504059
30500	27965	A_24_P235643	CUEDC2	NM_024040	Homo sapiens CUE domain containing 2 (CUEDC2), mRNA [NM_024040]	-0.662006	9.75302	-4.85843	8.89737e-05	0.00504059
24285	22192	A_23_P117274	MIPEP	NM_005932	Homo sapiens mitochondrial intermediate peptidase (MIPEP), nuclear gene encoding mitochondrial protein, mRNA [NM_005932]	-0.648094	8.74977	-4.85479	8.97357e-05	0.00504059
9744	8962	A_24_P390928	TRAPPC6A	NM_024108	Homo sapiens trafficking protein particle complex 6A (TRAPPC6A), mRNA [NM_024108]	-0.620749	11.4219	-4.85593	8.94961e-05	0.00504059
30158	27651	A_23_P85240	TLR7	NM_016562	Homo sapiens toll-like receptor 7 (TLR7), mRNA [NM_016562]	-0.598134	8.56227	-4.8547	8.9753e-05	0.00504059
7147	6525	A_24_P319715	PDIA6	NM_005742	Homo sapiens protein disulfide isomerase family A, member 6 (PDIA6), mRNA [NM_005742]	-0.546159	12.8012	-4.85954	8.87432e-05	0.00504059
14450	13224	A_24_P394698	ORC5L	NM_181747	Homo sapiens origin recognition complex, subunit 5-like (yeast) (ORC5L), transcript variant 2, mRNA [NM_181747]	-0.496998	7.88932	-4.85276	9.01632e-05	0.00504059
8935	8106	A_23_P161552	ZNF289	NM_032389	Homo sapiens zinc finger protein 289, ID1 regulated (ZNF289), mRNA [NM_032389]	-0.480449	9.1239	-4.85648	8.93815e-05	0.00504059
44242	40393	A_23_P49924	NT5C3L	NM_052935	Homo sapiens 5'-nucleotidase, cytosolic III-like (NT5C3L), mRNA [NM_052935]	-0.438849	8.76409	-4.85506	8.96775e-05	0.00504059
39746	36328	A_24_P239017	UBE2MP1	NR_002837	Homo sapiens ubiquitin-conjugating enzyme E2M pseudogene 1 (UBE2MP1) on chromosome 16 [NR_002837]	-0.364662	10.3895	-4.85263	9.01898e-05	0.00504059
23041	21000	A_23_P140994	DDX19B	NM_007242	Homo sapiens DEAD (Asp-Glu-Ala-As) box polypeptide 19B (DDX19B), transcript variant 1, mRNA [NM_007242]	-0.359437	8.72082	-4.85327	9.0056e-05	0.00504059
10898	9986	A_23_P113405	CNNM3	NM_017623	Homo sapiens cyclin M3 (CNNM3), transcript variant 1, mRNA [NM_017623]	-0.324116	9.31032	-4.85902	8.88513e-05	0.00504059
8621	7831	A_23_P58482	MGAT1	NM_002406	Homo sapiens mannosyl (alpha-1,3-)-glycoprotein beta-1,2-N-acetylglucosaminyltransferase (MGAT1), mRNA [NM_002406]	-0.347733	11.5968	-4.85003	9.07411e-05	0.00506096
21081	19266	A_23_P28279	ACTR1B	NM_005735	Homo sapiens ARP1 actin-related protein 1 homolog B, centractin beta (yeast) (ACTR1B), mRNA [NM_005735]	-0.366135	11.0211	-4.8475	9.12795e-05	0.00508054
14281	13073	A_24_P195621	A_24_P195621	A_24_P195621	Unknown	-0.728639	7.84134	-4.83543	9.38975e-05	0.00512199
41988	2210	A_24_P161933	CR608347	CR608347	full-length cDNA clone CS0DG002YJ10 of B cells (Ramos cell line) of Homo sapiens (human). [CR608347]	-0.674053	15.0468	-4.89274	9.38914e-05	0.00512199
2143	1757	A_23_P52031	PGM1	NM_002633	Homo sapiens phosphoglucomutase 1 (PGM1), mRNA [NM_002633]	-0.674026	11.8081	-4.8411	9.26586e-05	0.00512199
20949	2526	A_23_P210886	BCL2L1	NM_138578	Homo sapiens BCL2-like 1 (BCL2L1), nuclear gene encoding mitochondrial protein, transcript variant 1, mRNA [NM_138578]	-0.563987	8.04805	-4.89836	9.26961e-05	0.00512199
32718	30020	A_24_P379858	ACAA1	NM_001607	Homo sapiens acetyl-Coenzyme A acyltransferase 1 (peroxisomal 3-oxoacyl-Coenzyme A thiolase) (ACAA1), nuclear gene encoding mitochondrial protein, mRNA [NM_001607]	-0.557373	10.384	-4.83538	9.39097e-05	0.00512199
24306	22230	A_23_P54636	ATP6V0D1	NM_004691	Homo sapiens ATPase, H+ transporting, lysosomal 38kDa, V0 subunit d1 (ATP6V0D1), mRNA [NM_004691]	-0.529464	11.0119	-4.83892	9.31328e-05	0.00512199
20782	19028	A_23_P27571	MCOLN1	NM_020533	Homo sapiens mucolipin 1 (MCOLN1), mRNA [NM_020533]	-0.439646	8.26189	-4.83444	9.41173e-05	0.00512199
24910	22713	A_23_P373475	AKT2	NM_001626	Homo sapiens v-akt murine thymoma viral oncogene homolog 2 (AKT2), mRNA [NM_001626]	-0.405293	7.0555	-4.84021	9.28531e-05	0.00512199
15770	14373	A_23_P208400	ADCK4	NM_024876	Homo sapiens aarF domain containing kinase 4 (ADCK4), mRNA [NM_024876]	-0.335707	7.49082	-4.83696	9.35614e-05	0.00512199
28494	26022	A_32_P721983	A_32_P721983	A_32_P721983	Unknown	-0.291578	6.76064	-4.83365	9.42918e-05	0.00512199
2653	2229	A_24_P216313	ERGIC3	NM_015966	Homo sapiens ERGIC and golgi 3 (ERGIC3), transcript variant 2, mRNA [NM_015966]	-0.857797	10.9017	-4.82868	9.53962e-05	0.00512339
16844	15416	A_24_P600622	A_24_P600622	A_24_P600622	Unknown	-0.779056	9.12924	-4.81354	9.88422e-05	0.00512339
43624	39800	A_32_P327750	A_32_P327750	A_32_P327750	Unknown	-0.706135	9.25244	-4.81186	9.92318e-05	0.00512339
1650	1330	A_24_P749042	A_24_P749042	A_24_P749042	Unknown	-0.66268	8.59926	-4.81684	9.80799e-05	0.00512339
30359	27711	A_23_P411806	SLC44A1	NM_022109	Homo sapiens solute carrier family 44, member 1 (SLC44A1), transcript variant 1, mRNA [NM_022109]	-0.652074	8.87445	-4.81405	9.87231e-05	0.00512339
40709	37315	A_24_P135579	LOC344382	XM_293026	PREDICTED: Homo sapiens similar to Serine-threonine kinase receptor-associated protein (UNR-interacting protein) (WD-40 repeat protein PT-WD) (MAP activator with WD repeats) (LOC344382), mRNA [XM_293026]	-0.620189	9.00284	-4.82199	9.6903e-05	0.00512339
10291	9345	A_23_P134347	CPVL	NM_031311	Homo sapiens carboxypeptidase, vitellogenic-like (CPVL), transcript variant 1, mRNA [NM_031311]	-0.576808	8.32919	-4.81679	9.80906e-05	0.00512339
11323	10301	A_23_P10305	CTPS2	NM_175859	Homo sapiens CTP synthase II (CTPS2), transcript variant 2, mRNA [NM_175859]	-0.552511	8.34481	-4.81226	9.91388e-05	0.00512339
30595	27986	A_23_P103084	TOM1	NM_005488	Homo sapiens target of myb1 (chicken) (TOM1), mRNA [NM_005488]	-0.474863	7.7455	-4.82381	9.64895e-05	0.00512339
31270	28610	A_23_P79545	SUCLG1	NM_003849	Homo sapiens succinate-CoA ligase, GDP-forming, alpha subunit (SUCLG1), mRNA [NM_003849]	-0.473156	10.8335	-4.82574	9.60544e-05	0.00512339
27233	24945	A_24_P67929	C12orf41	NM_017822	Homo sapiens chromosome 12 open reading frame 41 (C12orf41), mRNA [NM_017822]	-0.470693	7.97923	-4.8138	9.87823e-05	0.00512339
32435	29661	A_24_P73389	STK24	NM_003576	Homo sapiens serine/threonine kinase 24 (STE20 homolog, yeast) (STK24), transcript variant 1, mRNA [NM_003576]	-0.463227	8.25307	-4.81806	9.78006e-05	0.00512339
31796	29111	A_23_P502174	DYNC2LI1	NM_015522	Homo sapiens dynein, cytoplasmic 2, light intermediate chain 1 (DYNC2LI1), transcript variant 2, mRNA [NM_015522]	-0.451951	9.8087	-4.82331	9.66046e-05	0.00512339
20034	18302	A_23_P502196	IDH3B	NM_174855	Homo sapiens isocitrate dehydrogenase 3 (NAD+) beta (IDH3B), nuclear gene encoding mitochondrial protein, transcript variant 2, mRNA [NM_174855]	-0.437687	9.73968	-4.82429	9.63821e-05	0.00512339
10977	9976	A_32_P532216	QARS	NM_005051	Homo sapiens glutaminyl-tRNA synthetase (QARS), mRNA [NM_005051]	-0.411769	9.55319	-4.81747	9.79364e-05	0.00512339
9874	9047	A_24_P386622	ARRB1	NM_004041	Homo sapiens arrestin, beta 1 (ARRB1), transcript variant 1, mRNA [NM_004041]	-0.393285	8.12991	-4.81314	9.89352e-05	0.00512339
2784	2478	A_24_P15754	TOMM40	NM_006114	Homo sapiens translocase of outer mitochondrial membrane 40 homolog (yeast) (TOMM40), mRNA [NM_006114]	-0.378036	8.10608	-4.82525	9.6165e-05	0.00512339
6312	5769	A_23_P54313	CD276	NM_001024736	Homo sapiens CD276 molecule (CD276), transcript variant 1, mRNA [NM_001024736]	-0.374821	8.50415	-4.81377	9.87879e-05	0.00512339
3772	3388	A_24_P283288	MAPK14	NM_139013	Homo sapiens mitogen-activated protein kinase 14 (MAPK14), transcript variant 3, mRNA [NM_139013]	-0.367257	7.54579	-4.82152	9.70105e-05	0.00512339
10265	9446	A_23_P50331	FAM32A	NM_014077	Homo sapiens family with sequence similarity 32, member A (FAM32A), mRNA [NM_014077]	-0.347058	10.9233	-4.82468	9.62932e-05	0.00512339
8900	8193	A_24_P328969	YIPF5	NM_030799	Homo sapiens Yip1 domain family, member 5 (YIPF5), transcript variant 2, mRNA [NM_030799]	-0.588783	9.9002	-4.80676	0.000100425	0.0051564
3597	3215	A_23_P154199	PPP1R7	NM_002712	Homo sapiens protein phosphatase 1, regulatory subunit 7 (PPP1R7), mRNA [NM_002712]	-0.35854	11.741	-4.80625	0.000100545	0.0051564
29805	27321	A_32_P22883	C21orf70	NM_058190	Homo sapiens chromosome 21 open reading frame 70 (C21orf70), mRNA [NM_058190]	-0.372358	10.6654	-4.80299	0.000101319	0.00518178
33609	30715	A_24_P251351	RAB1A	NM_004161	Homo sapiens RAB1A, member RAS oncogene family (RAB1A), mRNA [NM_004161]	-0.647055	10.3034	-4.7967	0.000102822	0.00520378
31575	28861	A_23_P70384	RNF8	NM_003958	Homo sapiens ring finger protein 8 (RNF8), transcript variant 1, mRNA [NM_003958]	-0.506123	9.21664	-4.79577	0.000103047	0.00520378
18100	16620	A_24_P381136	PACSIN3	NM_016223	Homo sapiens protein kinase C and casein kinase substrate in neurons 3 (PACSIN3), mRNA [NM_016223]	-0.42838	9.38779	-4.79589	0.000103019	0.00520378
9468	8615	A_24_P159866	STK11	NM_000455	Homo sapiens serine/threonine kinase 11 (STK11), mRNA [NM_000455]	-0.400339	8.83606	-4.79929	0.000102202	0.00520378
23800	21771	A_23_P20107	GSTK1	NM_015917	Homo sapiens glutathione S-transferase kappa 1 (GSTK1), mRNA [NM_015917]	-0.453091	10.0033	-4.79169	0.000104038	0.00521269
35505	32468	A_23_P161615	POLA2	NM_002689	Homo sapiens polymerase (DNA directed), alpha 2 (70kD subunit) (POLA2), mRNA [NM_002689]	-0.435405	8.49295	-4.79272	0.000103787	0.00521269
35247	32304	A_23_P116840	C12orf44	NM_021934	Homo sapiens chromosome 12 open reading frame 44 (C12orf44), mRNA [NM_021934]	-0.638692	10.2865	-4.78578	0.00010549	0.00523703
4096	3680	A_23_P104607	PSMC3	NM_002804	Homo sapiens proteasome (prosome, macropain) 26S subunit, ATPase, 3 (PSMC3), mRNA [NM_002804]	-0.540667	11.4346	-4.78638	0.000105342	0.00523703
37494	34231	A_24_P142473	DULLARD	NM_015343	Homo sapiens dullard homolog (Xenopus laevis) (DULLARD), mRNA [NM_015343]	-0.395473	9.80312	-4.78745	0.00010508	0.00523703
13605	12449	A_23_P92261	MGC2408	NM_032331	Homo sapiens hypothetical protein MGC2408 (MGC2408), mRNA [NM_032331]	-0.370196	10.0708	-4.78659	0.00010529	0.00523703
26328	24057	A_24_P268160	TMEM77	NM_178454	Homo sapiens transmembrane protein 77 (TMEM77), mRNA [NM_178454]	-0.352762	10.7257	-4.78493	0.000105701	0.00523791
37716	34482	A_24_P75700	A_24_P75700	A_24_P75700	Unknown	-0.525228	8.75562	-4.78044	0.000106822	0.00528377
35773	32801	A_23_P98252	ARL2	NM_001667	Homo sapiens ADP-ribosylation factor-like 2 (ARL2), mRNA [NM_001667]	-0.357247	10.8748	-4.77835	0.000107348	0.00528631
29984	27488	A_23_P71948	AKNA	NM_030767	Homo sapiens AT-hook transcription factor (AKNA), mRNA [NM_030767]	-0.24455	7.06934	-4.77791	0.000107458	0.00528631
23215	21163	A_23_P323836	C9orf75	NM_173691	Homo sapiens chromosome 9 open reading frame 75 (C9orf75), mRNA [NM_173691]	-0.363495	9.22565	-4.76706	0.00011023	0.00537236
10132	9207	A_32_P169505	RP11-130N24.1	NM_001008537	Homo sapiens KIAA2022 protein (KIAA2022), mRNA [NM_001008537]	-0.256147	6.9213	-4.76068	0.000111894	0.00542902
35948	32970	A_23_P15247	C16orf5	NM_013399	Homo sapiens chromosome 16 open reading frame 5 (C16orf5), mRNA [NM_013399]	-0.336727	7.5567	-4.75596	0.000113139	0.00545683
19580	17938	A_32_P201496	POLR3H	NM_001018052	Homo sapiens polymerase (RNA) III (DNA directed) polypeptide H (22.9kD) (POLR3H), transcript variant 2, mRNA [NM_001018052]	-0.471634	8.67181	-4.75257	0.000114044	0.00549071
33156	30350	A_24_P74981	AOF2	NM_015013	Homo sapiens amine oxidase (flavin containing) domain 2 (AOF2), transcript variant 2, mRNA [NM_015013]	-0.43983	9.48234	-4.75156	0.000114314	0.00549398
28144	25694	A_23_P48610	TMEM55B	NM_144568	Homo sapiens transmembrane protein 55B (TMEM55B), mRNA [NM_144568]	-0.239175	10.8756	-4.74859	0.000115113	0.00552259
6485	5931	A_24_P101617	tcag7.441	XM_930141	PREDICTED: Homo sapiens similar to Ubiquinol-cytochrome c reductase iron-sulfur subunit, mitochondrial precursor (Rieske iron-sulfur protein) (RISP) (Liver regeneration-related protein LRRGT00195) (LOC647123), mRNA [XM_930141]	-0.629413	8.95332	-4.74164	0.000117008	0.00552548
32308	29583	A_24_P202717	PLEKHJ1	NM_018049	Homo sapiens pleckstrin homology domain containing, family J member 1 (PLEKHJ1), mRNA [NM_018049]	-0.557684	10.0098	-4.74446	0.000116237	0.00552548
38864	35508	A_23_P148410	FTHL17	NM_031894	Homo sapiens ferritin, heavy polypeptide-like 17 (FTHL17), mRNA [NM_031894]	-0.557153	12.1821	-4.74703	0.000115537	0.00552548
13727	12517	A_23_P67748	RAB11B	NM_004218	Homo sapiens RAB11B, member RAS oncogene family (RAB11B), mRNA [NM_004218]	-0.346417	7.09805	-4.74179	0.000116967	0.00552548
32484	29747	A_32_P12454	BC041686	BC041686	Homo sapiens cDNA clone IMAGE:5287818. [BC041686]	-0.230548	6.49418	-4.74599	0.00011582	0.00552548
30800	28214	A_24_P451992	A_24_P451992	A_24_P451992	Unknown	-0.564594	7.6875	-4.73798	0.000118018	0.00553462
38911	35596	A_24_P372048	YKT6	NM_006555	Homo sapiens YKT6 v-SNARE homolog (S. cerevisiae) (YKT6), mRNA [NM_006555]	-0.512837	11.4007	-4.73812	0.00011798	0.00553462
39400	36018	A_23_P212458	SEC61A1	NM_013336	Homo sapiens Sec61 alpha 1 subunit (S. cerevisiae) (SEC61A1), mRNA [NM_013336]	-0.295077	11.9746	-4.73835	0.000117917	0.00553462
36358	33251	A_32_P232865	BCR	NM_021574	Homo sapiens breakpoint cluster region (BCR), transcript variant 2, mRNA [NM_021574]	-0.395817	9.42115	-4.73505	0.000118835	0.00554414
39441	36090	A_23_P354591	C9orf28	NM_033446	Homo sapiens chromosome 9 open reading frame 28 (C9orf28), transcript variant 1, mRNA [NM_033446]	-0.286003	8.1825	-4.73578	0.000118631	0.00554414
10483	9535	A_23_P102420	CCT4	NM_006430	Homo sapiens chaperonin containing TCP1, subunit 4 (delta) (CCT4), mRNA [NM_006430]	-0.352507	15.1652	-4.73248	0.000119553	0.00556807
3724	3297	A_23_P68892	C22orf28	NM_014306	Homo sapiens chromosome 22 open reading frame 28 (C22orf28), mRNA [NM_014306]	-0.531687	11.3628	-4.73175	0.000119761	0.00556815
11512	10488	A_24_P210399	TM9SF2	NM_004800	Homo sapiens transmembrane 9 superfamily member 2 (TM9SF2), mRNA [NM_004800]	-0.700497	11.1069	-4.73077	0.000120036	0.00557139
38039	34769	A_23_P200073	C1orf128	NM_020362	Homo sapiens chromosome 1 open reading frame 128 (C1orf128), mRNA [NM_020362]	-0.416468	8.70044	-4.72655	0.000121231	0.00561725
23817	21801	A_23_P33119	C8orf33	NM_023080	Homo sapiens chromosome 8 open reading frame 33 (C8orf33), mRNA [NM_023080]	-0.764716	7.9164	-4.7245	0.000121818	0.00562522
32013	29352	A_24_P408704	DOCK2	NM_004946	Homo sapiens dedicator of cytokinesis 2 (DOCK2), mRNA [NM_004946]	-0.524423	7.29375	-4.72512	0.00012164	0.00562522
22739	20760	A_24_P7380	A_24_P7380	A_24_P7380	Unknown	-0.571188	11.4502	-4.72328	0.000122167	0.00563175
33052	30319	A_23_P68884	DRG1	NM_004147	Homo sapiens developmentally regulated GTP binding protein 1 (DRG1), mRNA [NM_004147]	-0.553509	10.7881	-4.71609	0.00012425	0.00565449
15191	13942	A_24_P277747	TNRC5	NM_006586	Homo sapiens trinucleotide repeat containing 5 (TNRC5), transcript variant 1, mRNA [NM_006586]	-0.488358	8.25504	-4.71823	0.000123625	0.00565449
30244	27654	A_23_P135437	EXOC4	NM_021807	Homo sapiens exocyst complex component 4 (EXOC4), transcript variant 1, mRNA [NM_021807]	-0.474673	10.1816	-4.71581	0.00012433	0.00565449
44222	40356	A_23_P141847	UBE2M	NM_003969	Homo sapiens ubiquitin-conjugating enzyme E2M (UBC12 homolog, yeast) (UBE2M), mRNA [NM_003969]	-0.445067	10.5772	-4.71683	0.000124031	0.00565449
33189	30412	A_23_P121215	CAMK1	NM_003656	Homo sapiens calcium/calmodulin-dependent protein kinase I (CAMK1), mRNA [NM_003656]	-0.389973	7.23174	-4.71934	0.000123304	0.00565449
33998	31116	A_23_P29248	TST	NM_003312	Homo sapiens thiosulfate sulfurtransferase (rhodanese) (TST), nuclear gene encoding mitochondrial protein, mRNA [NM_003312]	-0.291035	12.8848	-4.71656	0.000124112	0.00565449
25937	23657	A_23_P166421	TBC1D10A	NM_031937	Homo sapiens TBC1 domain family, member 10A (TBC1D10A), mRNA [NM_031937]	-0.251019	11.1024	-4.71775	0.000123764	0.00565449
34594	31736	A_24_P276791	LRRC42	NM_052940	Homo sapiens leucine rich repeat containing 42 (LRRC42), mRNA [NM_052940]	-0.626585	8.92007	-4.71351	0.000125004	0.00567565
38283	35068	A_24_P356130	MAP2K5	NM_002757	Homo sapiens mitogen-activated protein kinase kinase 5 (MAP2K5), transcript variant B, mRNA [NM_002757]	-0.405191	7.7757	-4.71247	0.00012531	0.00568003
14024	12913	A_23_P74269	SRM	NM_003132	Homo sapiens spermidine synthase (SRM), mRNA [NM_003132]	-0.363162	10.6918	-4.70738	0.000126818	0.00573877
26053	23867	A_24_P293120	ZNF576	NM_024327	Homo sapiens zinc finger protein 576 (ZNF576), mRNA [NM_024327]	-0.379225	8.70676	-4.7058	0.000127289	0.00574093
7043	6493	A_23_P253389	SLC4A2	NM_003040	Homo sapiens solute carrier family 4, anion exchanger, member 2 (erythrocyte membrane protein band 3-like 1) (SLC4A2), mRNA [NM_003040]	-0.406279	8.39857	-4.70075	0.00012881	0.00577999
20156	18365	A_23_P152487	KARS	NM_005548	Homo sapiens lysyl-tRNA synthetase (KARS), mRNA [NM_005548]	-0.616124	9.5035	-4.69896	0.000129353	0.00578586
38006	34707	A_23_P155360	HDAC11	NM_024827	Homo sapiens histone deacetylase 11 (HDAC11), mRNA [NM_024827]	-0.371751	8.8318	-4.69777	0.000129715	0.00579253
3256	2889	A_23_P153441	HOOK2	NM_013312	Homo sapiens hook homolog 2 (Drosophila) (HOOK2), mRNA [NM_013312]	-0.336238	12.1483	-4.69506	0.000130546	0.00582001
30519	27849	A_23_P56529	AAMP	NM_001087	Homo sapiens angio-associated, migratory cell protein (AAMP), mRNA [NM_001087]	-0.462376	11.6485	-4.6913	0.000131704	0.005862
32401	29600	A_23_P500799	CASP6	NM_001226	Homo sapiens caspase 6, apoptosis-related cysteine peptidase (CASP6), transcript variant alpha, mRNA [NM_001226]	-0.478273	10.4093	-4.68503	0.00013366	0.00592961
20657	18802	A_23_P55045	SLC25A19	NM_021734	Homo sapiens solute carrier family 25 (mitochondrial deoxynucleotide carrier), member 19 (SLC25A19), mRNA [NM_021734]	-0.330997	8.22218	-4.68423	0.000133912	0.00593107
3632	3282	A_24_P370156	MAN2B1	NM_000528	Homo sapiens mannosidase, alpha, class 2B, member 1 (MAN2B1), mRNA [NM_000528]	-0.301384	9.69481	-4.68341	0.000134172	0.00593291
21533	19637	A_23_P29263	CSNK1E	NM_152221	Homo sapiens casein kinase 1, epsilon (CSNK1E), transcript variant 1, mRNA [NM_152221]	-0.445245	9.1522	-4.68235	0.000134508	0.00593763
30602	27999	A_23_P406424	RHOC	NM_175744	Homo sapiens ras homolog gene family, member C (RHOC), mRNA [NM_175744]	-0.435522	11.7116	-4.68166	0.000134726	0.00593763
37498	34239	A_23_P133923	BAT4	NM_033177	Homo sapiens HLA-B associated transcript 4 (BAT4), mRNA [NM_033177]	-0.266159	12.6479	-4.68099	0.000134936	0.00593763
32883	30169	A_24_P48495	LYPD3	NM_014400	Homo sapiens LY6/PLAUR domain containing 3 (LYPD3), mRNA [NM_014400]	-0.969137	8.32027	-4.67893	0.000135594	0.00595692
41007	37543	A_24_P281264	A_24_P281264	A_24_P281264	Unknown	-0.576309	8.31101	-4.67679	0.000136279	0.0059773
20374	18600	A_24_P21985	FOXJ2	NM_018416	Homo sapiens forkhead box J2 (FOXJ2), mRNA [NM_018416]	-0.392945	8.39933	-4.67563	0.00013665	0.0059839
19716	18032	A_24_P283320	PCMT1	NM_005389	Homo sapiens protein-L-isoaspartate (D-aspartate) O-methyltransferase (PCMT1), mRNA [NM_005389]	-0.719095	9.62025	-4.67384	0.000137225	0.00598707
26037	23839	A_24_P714134	AK126814	AK126814	Homo sapiens cDNA FLJ44864 fis, clone BRALZ2013621, moderately similar to Heterogeneous nuclear ribonucleoprotein K. [AK126814]	-0.63425	8.68389	-4.6659	0.000139815	0.00598717
40666	37231	A_23_P433016	FBLN1	NM_001996	Homo sapiens fibulin 1 (FBLN1), transcript variant C, mRNA [NM_001996]	-0.567945	10.2994	-4.66728	0.00013936	0.00598717
24265	22155	A_24_P237443	CXorf9	NM_018990	Homo sapiens chromosome X open reading frame 9 (CXorf9), mRNA [NM_018990]	-0.547858	8.36565	-4.669	0.000138798	0.00598717
26532	24275	A_23_P75255	VPS26A	NM_004896	Homo sapiens vacuolar protein sorting 26 homolog A (yeast) (VPS26A), transcript variant 1, mRNA [NM_004896]	-0.536479	11.1895	-4.67027	0.000138385	0.00598717
7527	6914	A_24_P106953	PTGES2	NM_198939	Homo sapiens prostaglandin E synthase 2 (PTGES2), transcript variant 3, mRNA [NM_198939]	-0.455904	8.19864	-4.67144	0.000138002	0.00598717
1355	1115	A_24_P127051	A_24_P127051	A_24_P127051	Unknown	-0.451789	15.2888	-4.66694	0.000139471	0.00598717
31059	28378	A_24_P155815	COG8	NM_032382	Homo sapiens component of oligomeric golgi complex 8 (COG8), mRNA [NM_032382]	-0.433609	7.76425	-4.66957	0.00013861	0.00598717
10462	9496	A_23_P89799	ACAA2	NM_006111	Homo sapiens acetyl-Coenzyme A acyltransferase 2 (mitochondrial 3-oxoacyl-Coenzyme A thiolase) (ACAA2), nuclear gene encoding mitochondrial protein, mRNA [NM_006111]	-0.425039	10.2831	-4.67161	0.000137949	0.00598717
25385	23261	A_23_P109593	TBC1D22A	NM_014346	Homo sapiens TBC1 domain family, member 22A (TBC1D22A), mRNA [NM_014346]	-0.276486	9.28499	-4.66602	0.000139775	0.00598717
44006	40157	A_24_P178523	A_24_P178523	A_24_P178523	Unknown	-0.351462	8.05925	-4.66352	0.000140599	0.00600167
41034	37594	A_24_P936605	U87972	U87972	Human NAD+-isocitrate dehydrogenase mRNA, partial cds. [U87972]	-0.382867	7.99085	-4.66175	0.000141185	0.00600821
25595	23339	A_24_P128683	C2orf24	NM_015680	Homo sapiens chromosome 2 open reading frame 24 (C2orf24), mRNA [NM_015680]	-0.292986	9.10692	-4.65966	0.000141882	0.00602799
32428	29647	A_24_P766205	A_24_P766205	A_24_P766205	Unknown	-0.721862	12.725	-4.65314	0.000144076	0.00605437
25297	23104	A_24_P148811	RUVBL1	NM_003707	Homo sapiens RuvB-like 1 (E. coli) (RUVBL1), mRNA [NM_003707]	-0.693441	8.39411	-4.65611	0.000143071	0.00605437
19573	17924	A_24_P294832	PTP4A1	NM_003463	Homo sapiens protein tyrosine phosphatase type IVA, member 1 (PTP4A1), mRNA [NM_003463]	-0.655229	10.3554	-4.65487	0.00014349	0.00605437
578	513	A_24_P378368	MBTPS1	NM_003791	Homo sapiens membrane-bound transcription factor peptidase, site 1 (MBTPS1), transcript variant 1, mRNA [NM_003791]	-0.606666	8.45677	-4.65227	0.000144371	0.00605437
35971	32855	A_24_P338145	STOML2	NM_013442	Homo sapiens stomatin (EPB72)-like 2 (STOML2), mRNA [NM_013442]	-0.565273	9.97145	-4.65185	0.000144513	0.00605437
4715	4204	A_24_P79054	TGFB1	NM_000660	Homo sapiens transforming growth factor, beta 1 (Camurati-Engelmann disease) (TGFB1), mRNA [NM_000660]	-0.403993	8.47232	-4.76271	0.000144474	0.00605437
3891	3452	A_23_P74799	SLC25A24	NM_213651	Homo sapiens solute carrier family 25 (mitochondrial carrier; phosphate carrier), member 24 (SLC25A24), transcript variant 2, mRNA [NM_213651]	-0.39521	11.9154	-4.65507	0.000143424	0.00605437
4261	3832	A_23_P1615	FIBP	NM_004214	Homo sapiens fibroblast growth factor (acidic) intracellular binding protein (FIBP), transcript variant 2, mRNA [NM_004214]	-0.518083	9.29052	-4.65069	0.000144908	0.00605804
3401	3005	A_23_P11224	TMEM32	NM_173470	Homo sapiens transmembrane protein 32 (TMEM32), mRNA [NM_173470]	-0.490082	11.0461	-4.64963	0.000145271	0.00605804
13702	12472	A_23_P94174	MRPL15	NM_014175	Homo sapiens mitochondrial ribosomal protein L15 (MRPL15), nuclear gene encoding mitochondrial protein, mRNA [NM_014175]	-0.383954	12.0556	-4.64976	0.000145226	0.00605804
9570	8803	A_23_P54223	RABGGTA	NM_004581	Homo sapiens Rab geranylgeranyltransferase, alpha subunit (RABGGTA), transcript variant 2, mRNA [NM_004581]	-0.322927	8.05041	-4.64796	0.000145844	0.00607259
25336	23173	A_32_P234459	HLA-H	NR_001434	Homo sapiens major histocompatibility complex, class I, H (pseudogene) (HLA-H) on chromosome 6 [NR_001434]	-0.617981	14.7848	-4.64253	0.000147721	0.00609936
10769	9905	A_23_P145463	SLC35B3	NM_015948	Homo sapiens solute carrier family 35, member B3 (SLC35B3), mRNA [NM_015948]	-0.481644	9.64969	-4.64138	0.000148119	0.00609936
24066	21946	A_24_P333357	RAB40C	AK090463	Homo sapiens mRNA for FLJ00384 protein. [AK090463]	-0.43413	8.97795	-4.64526	0.000146773	0.00609936
42626	38954	A_32_P155506	UBE2E2	NM_152653	Homo sapiens ubiquitin-conjugating enzyme E2E 2 (UBC4/5 homolog, yeast) (UBE2E2), mRNA [NM_152653]	-0.339396	8.14073	-4.64473	0.000146956	0.00609936
2491	2083	A_23_P17144	XAB1	NM_007266	Homo sapiens XPA binding protein 1, GTPase (XAB1), mRNA [NM_007266]	-0.309128	11.9917	-4.64265	0.000147678	0.00609936
13866	12623	A_24_P278637	FADD	NM_003824	Homo sapiens Fas (TNFRSF6)-associated via death domain (FADD), mRNA [NM_003824]	-0.670688	9.13794	-4.63843	0.000149153	0.00610738
8142	7421	A_24_P144275	A_24_P144275	A_24_P144275	Unknown	-0.431397	10.9432	-4.63948	0.000148784	0.00610738
23168	21233	A_23_P77440	NFATC3	NM_173164	Homo sapiens nuclear factor of activated T-cells, cytoplasmic, calcineurin-dependent 3 (NFATC3), transcript variant 4, mRNA [NM_173164]	-0.582011	8.55539	-4.63391	0.000150747	0.00612477
43504	39747	A_24_P134816	BCL9L	NM_182557	Homo sapiens B-cell CLL/lymphoma 9-like (BCL9L), mRNA [NM_182557]	-0.40031	8.58697	-4.63648	0.000149837	0.00612477
5040	4497	A_24_P581618	A_24_P581618	A_24_P581618	Unknown	-0.396824	7.82727	-4.63351	0.000150888	0.00612477
17994	16430	A_24_P163405	RFP	NM_030950	Homo sapiens ret finger protein (RFP), transcript variant beta, mRNA [NM_030950]	-0.344454	9.97439	-4.63142	0.000151636	0.00613468
27098	24856	A_32_P57237	RPL21	NM_000982	Homo sapiens ribosomal protein L21 (RPL21), mRNA [NM_000982]	-0.528064	15.0062	-4.6287	0.000152608	0.00616223
30147	27631	A_23_P80213	TOP3B	NM_003935	Homo sapiens topoisomerase (DNA) III beta (TOP3B), mRNA [NM_003935]	-0.300415	7.69782	-4.62825	0.000152771	0.00616223
6838	6270	A_23_P97265	GPATC4	NM_182679	Homo sapiens G patch domain containing 4 (GPATC4), transcript variant 2, mRNA [NM_182679]	-0.452087	11.2749	-4.62418	0.000154241	0.00621226
6401	5778	A_23_P72853	MFSD5	NM_032889	Homo sapiens major facilitator superfamily domain containing 5 (MFSD5), mRNA [NM_032889]	-0.538704	10.3119	-4.62121	0.000155323	0.00623453
13158	12099	A_23_P109410	THAP7	NM_030573	Homo sapiens THAP domain containing 7 (THAP7), transcript variant 1, mRNA [NM_030573]	-0.320544	8.1132	-4.62077	0.000155484	0.00623453
23725	21636	A_32_P22401	RPRC1	NM_018067	Homo sapiens arginine/proline rich coiled-coil 1 (RPRC1), mRNA [NM_018067]	-0.315045	12.4381	-4.62194	0.000155056	0.00623453
8157	7447	A_32_P331700	A_32_P331700	A_32_P331700	Unknown	-0.643836	9.18502	-4.61919	0.000156066	0.00624001
41771	38166	A_24_P187750	ARF3	NM_001659	Homo sapiens ADP-ribosylation factor 3 (ARF3), mRNA [NM_001659]	-0.508121	8.94241	-4.61915	0.000156081	0.00624001
18069	16570	A_23_P6119	SEC23B	NM_032986	Homo sapiens Sec23 homolog B (S. cerevisiae) (SEC23B), transcript variant 3, mRNA [NM_032986]	-0.725444	9.64935	-4.61619	0.000157171	0.00624655
28446	26088	A_23_P145718	AOAH	NM_001637	Homo sapiens acyloxyacyl hydrolase (neutrophil) (AOAH), mRNA [NM_001637]	-0.440556	7.11181	-4.61642	0.000157086	0.00624655
6407	5790	A_24_P272886	A_24_P272886	A_24_P272886	Unknown	-0.565243	10.6916	-4.61431	0.000157869	0.0062494
23187	21270	A_24_P766716	AK126405	AK126405	Homo sapiens cDNA FLJ44441 fis, clone UTERU2020242. [AK126405]	-0.510121	10.2347	-4.61415	0.00015793	0.0062494
10732	9836	A_23_P39971	C2orf30	NM_015701	Homo sapiens chromosome 2 open reading frame 30 (C2orf30), mRNA [NM_015701]	-0.620203	10.5589	-4.60619	0.000160916	0.00627026
27826	25418	A_24_P940537	STK35	NM_080836	Homo sapiens serine/threonine kinase 35 (STK35), mRNA [NM_080836]	-0.524391	7.85271	-4.60634	0.00016086	0.00627026
15681	14365	A_23_P6474	JOSD1	NM_014876	Homo sapiens Josephin domain containing 1 (JOSD1), mRNA [NM_014876]	-0.519922	7.10357	-4.60475	0.000161464	0.00627026
14370	13081	A_23_P218434	ZNF226	NM_015919	Homo sapiens zinc finger protein 226 (ZNF226), transcript variant 4, mRNA [NM_015919]	-0.489989	10.076	-4.60497	0.000161381	0.00627026
34437	31448	A_23_P216655	TRIM14	NM_014788	Homo sapiens tripartite motif-containing 14 (TRIM14), transcript variant 1, mRNA [NM_014788]	-0.421091	9.45074	-4.6052	0.000161295	0.00627026
19342	17660	A_32_P193218	AK123506	AK123506	Homo sapiens cDNA FLJ41512 fis, clone BRTHA2010097. [AK123506]	-0.419292	7.42512	-4.60756	0.000160397	0.00627026
16105	14682	A_23_P100469	TXNL4B	NM_017853	Homo sapiens thioredoxin-like 4B (TXNL4B), mRNA [NM_017853]	-0.320432	7.20256	-4.605	0.000161368	0.00627026
7631	6951	A_24_P415327	HPS1	NM_000195	Homo sapiens Hermansky-Pudlak syndrome 1 (HPS1), transcript variant 1, mRNA [NM_000195]	-0.293488	9.88526	-4.60609	0.000160957	0.00627026
10413	9563	A_23_P61487	LRRC20	NM_018205	Homo sapiens leucine rich repeat containing 20 (LRRC20), transcript variant 3, mRNA [NM_018205]	-0.270736	10.1134	-4.60511	0.000161327	0.00627026
6069	5473	A_24_P41483	A_24_P41483	A_24_P41483	Unknown	-0.260592	6.85029	-4.60273	0.000162235	0.00629119
14362	13218	A_24_P79755	AKR1A1	NM_006066	Homo sapiens aldo-keto reductase family 1, member A1 (aldehyde reductase) (AKR1A1), transcript variant 1, mRNA [NM_006066]	-0.559737	9.70103	-4.60111	0.000162857	0.00629183
22120	20244	A_24_P325691	TRIP12	NM_004238	Homo sapiens thyroid hormone receptor interactor 12 (TRIP12), mRNA [NM_004238]	-0.446931	11.001	-4.65002	0.000163491	0.00629487
27742	25419	A_23_P74887	SDC3	AB007937	Homo sapiens mRNA for KIAA0468 protein, partial cds. [AB007937]	-0.394526	8.77048	-4.59441	0.000165447	0.00634317
13374	12184	A_24_P303193	CR596214	CR596214	full-length cDNA clone CS0DC006YB07 of Neuroblastoma Cot 25-normalized of Homo sapiens (human). [CR596214]	-0.483486	9.24659	-4.59378	0.00016569	0.00634351
3655	3327	A_23_P77572	EIF3S8	NM_003752	Homo sapiens eukaryotic translation initiation factor 3, subunit 8, 110kDa (EIF3S8), transcript variant 1, mRNA [NM_003752]	-0.265196	13.7484	-4.59272	0.000166108	0.00635052
30328	27809	A_23_P4007	FXR2	NM_004860	Homo sapiens fragile X mental retardation, autosomal homolog 2 (FXR2), mRNA [NM_004860]	-0.54503	7.94415	-4.59136	0.00016664	0.00635296
34354	31451	A_23_P41437	C4orf20	NM_018359	Homo sapiens chromosome 4 open reading frame 20 (C4orf20), mRNA [NM_018359]	-0.286683	10.9611	-4.59149	0.000166588	0.00635296
34241	31401	A_24_P383076	AASDH	NM_181806	Homo sapiens 2-aminoadipic 6-semialdehyde dehydrogenase (AASDH), mRNA [NM_181806]	-0.427611	8.09704	-4.58934	0.000167436	0.00637431
14854	13644	A_24_P607107	A_24_P607107	A_24_P607107	Unknown	-0.494135	11.5481	-4.58749	0.000168167	0.00638423
16368	14999	A_23_P33216	ATP5B	NM_001686	Homo sapiens ATP synthase, H+ transporting, mitochondrial F1 complex, beta polypeptide (ATP5B), nuclear gene encoding mitochondrial protein, mRNA [NM_001686]	-0.758899	12.231	-4.58612	0.000168711	0.0063959
10598	9750	A_24_P679796	A_24_P679796	A_24_P679796	Unknown	-0.750201	11.2004	-4.5828	0.000170037	0.00641033
4478	4081	A_24_P141005	SYPL1	NM_182715	Homo sapiens synaptophysin-like 1 (SYPL1), transcript variant 2, mRNA [NM_182715]	-0.647846	8.09909	-4.5843	0.000169434	0.00641033
23789	21752	A_24_P612446	C6orf89	NM_152734	Homo sapiens chromosome 6 open reading frame 89 (C6orf89), mRNA [NM_152734]	-0.554241	8.92635	-4.582	0.000170355	0.0064134
3345	2898	A_23_P216610	SUSD1	NM_022486	Homo sapiens sushi domain containing 1 (SUSD1), mRNA [NM_022486]	-0.296583	8.79191	-4.57829	0.000171851	0.00645181
38250	35007	A_24_P177025	CDC34	NM_004359	Homo sapiens cell division cycle 34 (CDC34), mRNA [NM_004359]	-0.355173	10.0296	-4.57761	0.000172129	0.00645328
2050	1740	A_24_P54178	TMED5	NM_016040	Homo sapiens transmembrane emp24 protein transport domain containing 5 (TMED5), mRNA [NM_016040]	-0.517277	10.5755	-4.57698	0.000172385	0.00645396
29648	27194	A_24_P279760	A_24_P279760	A_24_P279760	Unknown	-0.5606	11.1392	-4.57482	0.000173263	0.00647229
5718	5136	A_23_P54963	MRPL38	NM_032478	Homo sapiens mitochondrial ribosomal protein L38 (MRPL38), nuclear gene encoding mitochondrial protein, mRNA [NM_032478]	-0.378015	9.79768	-4.57402	0.000173591	0.00647229
8954	8140	A_24_P135902	RPS2	NM_002952	Homo sapiens ribosomal protein S2 (RPS2), mRNA [NM_002952]	-0.682821	17.0494	-4.57072	0.000174947	0.00649073
31741	29009	A_23_P154330	TXNDC9	NM_005783	Homo sapiens thioredoxin domain containing 9 (TXNDC9), mRNA [NM_005783]	-0.495562	11.6391	-4.57	0.000175245	0.00649073
5673	5209	A_23_P60240	PIGO	NM_032634	Homo sapiens phosphatidylinositol glycan anchor biosynthesis, class O (PIGO), transcript variant 1, mRNA [NM_032634]	-0.369454	10.0945	-4.57042	0.00017507	0.00649073
23085	21078	A_23_P62139	PQBP1	NM_005710	Homo sapiens polyglutamine binding protein 1 (PQBP1), transcript variant 1, mRNA [NM_005710]	-0.302602	10.3077	-4.56817	0.000176001	0.00649073
32278	29527	A_23_P108994	RPN2	NM_002951	Homo sapiens ribophorin II (RPN2), mRNA [NM_002951]	-0.804033	11.0217	-4.56611	0.000176858	0.00649293
12372	11276	A_24_P67408	A_24_P67408	A_24_P67408	Unknown	-0.469422	10.2524	-4.56575	0.000177007	0.00649293
4701	4180	A_23_P152406	CAPNS2	NM_032330	Homo sapiens calpain, small subunit 2 (CAPNS2), mRNA [NM_032330]	-0.375979	7.71238	-4.56676	0.000176588	0.00649293
31976	29286	A_23_P358928	SRI	NM_003130	Homo sapiens sorcin (SRI), transcript variant 1, mRNA [NM_003130]	-0.425599	13.3801	-4.56261	0.000178322	0.00649363
17029	15595	A_24_P204358	PYCR1	NM_153824	Homo sapiens pyrroline-5-carboxylate reductase 1 (PYCR1), transcript variant 2, mRNA [NM_153824]	-0.404263	9.81568	-4.56419	0.00017766	0.00649363
43815	39972	A_24_P336957	HTRA2	NM_145074	Homo sapiens HtrA serine peptidase 2 (HTRA2), nuclear gene encoding mitochondrial protein, transcript variant 2, mRNA [NM_145074]	-0.198666	11.0206	-4.56334	0.000178016	0.00649363
25204	23087	A_24_P603890	A_24_P603890	A_24_P603890	Unknown	-0.732492	12.3011	-4.55988	0.000179474	0.00651246
37613	34450	A_24_P295806	CHID1	NM_023947	Homo sapiens chitinase domain containing 1 (CHID1), mRNA [NM_023947]	-0.717067	9.14038	-4.55677	0.000180795	0.00653417
9452	8588	A_24_P152335	NKIRAS2	NM_001001349	Homo sapiens NFKB inhibitor interacting Ras-like 2 (NKIRAS2), transcript variant 1, mRNA [NM_001001349]	-0.365537	7.72318	-4.55585	0.000181188	0.00653816
526	410	A_24_P378987	DHRSX	NM_145177	Homo sapiens dehydrogenase/reductase (SDR family) X-linked (DHRSX), mRNA [NM_145177]	-0.315185	10.5813	-4.55538	0.000181388	0.00653816
38494	35296	A_24_P571937	CB131079	CB131079	CB131079 K-EST0181079 L13SNU387 Homo sapiens cDNA clone L13SNU387-14-G04 5', mRNA sequence [CB131079]	-0.705431	13.5867	-4.55383	0.000182054	0.00654475
5966	5441	A_23_P334123	ITFG1	NM_030790	Homo sapiens integrin alpha FG-GAP repeat containing 1 (ITFG1), mRNA [NM_030790]	-0.431842	10.3534	-4.55197	0.000182855	0.00654751
30888	28221	A_23_P159227	ADAM15	NM_207191	Homo sapiens ADAM metallopeptidase domain 15 (metargidin) (ADAM15), transcript variant 1, mRNA [NM_207191]	-0.615187	9.35325	-4.54218	0.000187126	0.00662672
6173	5666	A_23_P33072	MAF1	NM_032272	Homo sapiens MAF1 homolog (S. cerevisiae) (MAF1), mRNA [NM_032272]	-0.575847	9.12834	-4.5413	0.000187512	0.00662672
18489	16868	A_23_P1519	PITPNM1	NM_004910	Homo sapiens phosphatidylinositol transfer protein, membrane-associated 1 (PITPNM1), mRNA [NM_004910]	-0.495934	7.89793	-4.54177	0.000187307	0.00662672
33146	30334	A_24_P282578	SSR2	NM_003145	Homo sapiens signal sequence receptor, beta (translocon-associated protein beta) (SSR2), mRNA [NM_003145]	-0.494305	12.8326	-4.5444	0.000186146	0.00662672
7880	7249	A_23_P214969	CITED2	NM_006079	Homo sapiens Cbp/p300-interacting transactivator, with Glu/Asp-rich carboxy-terminal domain, 2 (CITED2), mRNA [NM_006079]	-0.424215	10.8379	-4.54434	0.000186175	0.00662672
20051	18329	A_24_P410363	EGLN1	NM_022051	Homo sapiens egl nine homolog 1 (C. elegans) (EGLN1), mRNA [NM_022051]	-0.328847	7.76621	-4.53875	0.000188643	0.00664937
39933	36516	A_24_P165656	PRKD3	NM_005813	Homo sapiens protein kinase D3 (PRKD3), mRNA [NM_005813]	-0.481399	9.1729	-4.53508	0.000190285	0.00665531
38095	34874	A_23_P419947	MLF1	NM_022443	Homo sapiens myeloid leukemia factor 1 (MLF1), mRNA [NM_022443]	-0.451436	8.46207	-4.53734	0.000189272	0.00665531
17613	16044	A_32_P135902	EIF4A1	NM_001416	Homo sapiens eukaryotic translation initiation factor 4A, isoform 1 (EIF4A1), mRNA [NM_001416]	-0.447989	11.1654	-4.53631	0.000189735	0.00665531
2413	2096	A_24_P312189	BCDIN3	NM_019606	Homo sapiens bin3, bicoid-interacting 3, homolog (Drosophila) (BCDIN3), mRNA [NM_019606]	-0.385971	9.2886	-4.537	0.000189425	0.00665531
30968	28367	A_23_P132248	ZMAT5	NM_019103	Homo sapiens zinc finger, matrin type 5 (ZMAT5), transcript variant 1, mRNA [NM_019103]	-0.373843	8.50108	-4.53555	0.000190075	0.00665531
12024	10952	A_23_P142205	LILRA2	NM_006866	Homo sapiens leukocyte immunoglobulin-like receptor, subfamily A (with TM domain), member 2 (LILRA2), mRNA [NM_006866]	-0.217586	6.4946	-4.53578	0.000189971	0.00665531
32456	29700	A_23_P6746	IQSEC1	NM_014869	Homo sapiens IQ motif and Sec7 domain 1 (IQSEC1), mRNA [NM_014869]	-0.378236	9.6549	-4.52979	0.000192674	0.00672609
33940	31006	A_24_P109644	AF229166	AF229166	Homo sapiens docking protein 1-like protein mRNA, partial cds. [AF229166]	-0.315043	6.83971	-4.5295	0.000192805	0.00672609
42168	38587	A_23_P38497	SLC25A11	NM_003562	Homo sapiens solute carrier family 25 (mitochondrial carrier; oxoglutarate carrier), member 11 (SLC25A11), mRNA [NM_003562]	-0.562729	9.92213	-4.52315	0.000195718	0.00673118
1471	1162	A_24_P578437	BE926212	BE926212	BE926212 RC5-BN0193-310800-034-A04 BN0193 Homo sapiens cDNA, mRNA sequence [BE926212]	-0.552131	10.0159	-4.52275	0.000195902	0.00673118
40487	37061	A_24_P49800	A_24_P49800	A_24_P49800	Unknown	-0.522472	13.6915	-4.52602	0.000194396	0.00673118
28797	26418	A_32_P224840	FTS	NM_001012398	Homo sapiens fused toes homolog (mouse) (FTS), transcript variant 1, mRNA [NM_001012398]	-0.485626	7.6691	-4.5253	0.000194728	0.00673118
35718	32708	A_24_P245767	SUMO3	NM_006936	Homo sapiens SMT3 suppressor of mif two 3 homolog 3 (S. cerevisiae) (SUMO3), mRNA [NM_006936]	-0.453777	9.378	-4.52737	0.000193779	0.00673118
146	102	A_23_P379550	YARS	NM_003680	Homo sapiens tyrosyl-tRNA synthetase (YARS), mRNA [NM_003680]	-0.377147	9.18329	-4.5238	0.000195415	0.00673118
15691	14384	A_24_P95439	CARS	NM_001014438	Homo sapiens cysteinyl-tRNA synthetase (CARS), transcript variant 4, mRNA [NM_001014438]	-0.370315	8.50332	-4.52674	0.000194064	0.00673118
13809	12677	A_24_P273799	ENST00000301042	ENST00000301042	Homo sapiens mRNA; cDNA DKFZp667D1012 (from clone DKFZp667D1012). [AL713659]	-0.285654	8.40406	-4.52397	0.00019534	0.00673118
4819	4398	A_23_P162579	HSPB8	NM_014365	Homo sapiens heat shock 22kDa protein 8 (HSPB8), mRNA [NM_014365]	-0.610372	8.11582	-4.52032	0.000197028	0.00675473
22564	20595	A_32_P194848	TAGLN2	NM_003564	Homo sapiens transgelin 2 (TAGLN2), mRNA [NM_003564]	-0.603664	8.36572	-4.51968	0.000197327	0.00675473
9518	8704	A_24_P465772	LOC204010	BC107865	Homo sapiens similar to 40S ribosomal protein SA (P40) (34/67 kDa laminin receptor) (Colon carcinoma laminin-binding protein) (NEM/1CHD4) (Multidrug resistance-associated protein MGr1-Ag), mRNA (cDNA clone MGC:104447 IMAGE:4095371), complete cds....	-0.383174	13.1408	-4.5196	0.000197364	0.00675473
38860	35500	A_23_P33613	XTP3TPA	NM_024096	Homo sapiens XTP3-transactivated protein A (XTP3TPA), mRNA [NM_024096]	-0.718444	12.2788	-4.50682	0.000203403	0.00678201
20707	18893	A_23_P128817	PCK2	NM_004563	Homo sapiens phosphoenolpyruvate carboxykinase 2 (mitochondrial) (PCK2), nuclear gene encoding mitochondrial protein, transcript variant 1, mRNA [NM_004563]	-0.623885	9.04085	-4.51203	0.00020092	0.00678201
26216	24009	A_32_P725218	METTL2A	NM_001005372	Homo sapiens methyltransferase like 2A (METTL2A), mRNA [NM_001005372]	-0.503153	8.22977	-4.51111	0.000201356	0.00678201
25520	23356	A_24_P118591	A_24_P118591	A_24_P118591	Unknown	-0.502324	14.1059	-4.50706	0.000203289	0.00678201
293	185	A_23_P107211	RAB5C	NM_201434	Homo sapiens RAB5C, member RAS oncogene family (RAB5C), transcript variant 1, mRNA [NM_201434]	-0.488582	9.66501	-4.51439	0.000199802	0.00678201
10535	9632	A_23_P135364	DTYMK	NM_012145	Homo sapiens deoxythymidylate kinase (thymidylate kinase) (DTYMK), mRNA [NM_012145]	-0.482615	10.3626	-4.50762	0.000203024	0.00678201
31440	28768	A_23_P46063	NME7	NM_013330	Homo sapiens non-metastatic cells 7, protein expressed in (nucleoside-diphosphate kinase) (NME7), transcript variant 1, mRNA [NM_013330]	-0.45401	9.77341	-4.50883	0.000202442	0.00678201
6623	6030	A_32_P147241	PKM2	NM_182470	Homo sapiens pyruvate kinase, muscle (PKM2), transcript variant 2, mRNA [NM_182470]	-0.417254	11.3485	-4.50576	0.000203916	0.00678201
30382	27753	A_24_P80406	LOC152217	BC062368	Homo sapiens hypothetical protein BC007882, mRNA (cDNA clone MGC:71256 IMAGE:6730791), complete cds. [BC062368]	-0.408341	9.90307	-4.51628	0.000198913	0.00678201
27054	24772	A_32_P132796	BRE	NM_004899	Homo sapiens brain and reproductive organ-expressed (TNFRSF1A modulator) (BRE), transcript variant 1, mRNA [NM_004899]	-0.401278	8.97729	-4.5141	0.000199942	0.00678201
38489	35286	A_23_P11995	PRDX1	NM_002574	Homo sapiens peroxiredoxin 1 (PRDX1), transcript variant 1, mRNA [NM_002574]	-0.391427	14.8063	-4.51335	0.000200293	0.00678201
12268	11238	A_23_P86818	PEX16	NM_004813	Homo sapiens peroxisomal biogenesis factor 16 (PEX16), transcript variant 1, mRNA [NM_004813]	-0.340909	8.63214	-4.51464	0.000199686	0.00678201
26784	24429	A_23_P168683	DDX56	NM_019082	Homo sapiens DEAD (Asp-Glu-Ala-Asp) box polypeptide 56 (DDX56), mRNA [NM_019082]	-0.305112	8.89968	-4.51292	0.0002005	0.00678201
13331	12263	A_23_P368896	SNX12	NM_013346	Homo sapiens sorting nexin 12 (SNX12), mRNA [NM_013346]	-0.266254	7.75714	-4.51028	0.000201751	0.00678201
20801	19062	A_24_P612656	A_24_P612656	A_24_P612656	Unknown	-0.221116	16.0119	-4.51044	0.000201673	0.00678201
23329	21382	A_24_P11965	MRFAP1	NM_033296	Homo sapiens Mof4 family associated protein 1 (MRFAP1), mRNA [NM_033296]	-0.518083	13.3139	-4.50155	0.000205951	0.00682091
26041	23845	A_23_P332509	NAG	NM_015909	Homo sapiens neuroblastoma-amplified protein (NAG), mRNA [NM_015909]	-0.415202	10.2374	-4.5011	0.000206171	0.00682091
41615	38033	A_23_P159544	ASMTL	NM_004192	Homo sapiens acetylserotonin O-methyltransferase-like (ASMTL), mRNA [NM_004192]	-0.414928	9.84808	-4.49989	0.000206758	0.00682091
11977	11018	A_23_P165788	PHOSPHO2	NM_001008489	Homo sapiens phosphatase, orphan 2 (PHOSPHO2), mRNA [NM_001008489]	-0.397009	9.94798	-4.49861	0.000207384	0.00682091
13599	12438	A_24_P308628	HEMK1	NM_016173	Homo sapiens HemK methyltransferase family member 1 (HEMK1), mRNA [NM_016173]	-0.36161	8.72893	-4.49873	0.000207325	0.00682091
2176	1821	A_24_P212605	A_24_P212605	A_24_P212605	Unknown	-0.723233	12.2981	-4.49594	0.000208694	0.00684607
35966	32845	A_24_P402242	COL3A1	NM_000090	Homo sapiens collagen, type III, alpha 1 (Ehlers-Danlos syndrome type IV, autosomal dominant) (COL3A1), mRNA [NM_000090]	-1.15372	11.5958	-4.49044	0.000211422	0.0069129
39287	35965	A_23_P130886	FLJ14981	AK027887	Homo sapiens cDNA FLJ14981 fis, clone Y79AA1000202. [AK027887]	-0.407407	10.0687	-4.49084	0.000211221	0.0069129
18313	16700	A_23_P99604	KIAA1333	NM_017769	Homo sapiens KIAA1333 (KIAA1333), mRNA [NM_017769]	-0.346738	8.37988	-4.48981	0.000211739	0.00691495
29439	26968	A_24_P388622	STX18	NM_016930	Homo sapiens syntaxin 18 (STX18), mRNA [NM_016930]	-0.45705	8.96619	-4.48909	0.000212098	0.00691832
11040	10090	A_23_P106761	CORO1A	NM_007074	Homo sapiens coronin, actin binding protein, 1A (CORO1A), mRNA [NM_007074]	-0.52299	9.71603	-4.48803	0.00021263	0.00692735
9950	9032	A_32_P44316	EEF1A1	NM_001402	Homo sapiens eukaryotic translation elongation factor 1 alpha 1 (EEF1A1), mRNA [NM_001402]	-0.696078	13.3695	-4.48639	0.000213451	0.00694576
9103	8257	A_23_P211522	SYNGR1	NM_145738	Homo sapiens synaptogyrin 1 (SYNGR1), transcript variant 1c, mRNA [NM_145738]	-0.409498	9.00027	-4.48407	0.000214627	0.00695063
36957	33869	A_23_P31893	ST3GAL1	NM_003033	Homo sapiens ST3 beta-galactoside alpha-2,3-sialyltransferase 1 (ST3GAL1), transcript variant 1, mRNA [NM_003033]	-0.398728	11.1935	-4.48452	0.000214397	0.00695063
28445	26086	A_23_P10798	CNP	NM_033133	Homo sapiens 2',3'-cyclic nucleotide 3' phosphodiesterase (CNP), mRNA [NM_033133]	-0.438759	6.93939	-4.48296	0.000215189	0.00695222
38796	35540	A_32_P191895	BC045716	BC045716	Homo sapiens cDNA clone IMAGE:5261156. [BC045716]	-0.451022	8.05849	-4.47986	0.000216769	0.00699494
21500	19729	A_24_P400981	A_24_P400981	A_24_P400981	Unknown	-0.330288	8.51861	-4.47487	0.000219337	0.00706939
5045	4507	A_24_P212834	A_24_P212834	A_24_P212834	Unknown	-0.494872	9.24858	-4.46908	0.00022236	0.00713289
18349	16764	A_24_P340976	AL039916	AL039916	AL039916 DKFZp434H1712_r1 434 (synonym: htes3) Homo sapiens cDNA clone DKFZp434H1712 5', mRNA sequence [AL039916]	-0.399423	13.4148	-4.46826	0.00022279	0.00713822
20592	18838	A_23_P108157	TJP3	NM_014428	Homo sapiens tight junction protein 3 (zona occludens 3) (TJP3), mRNA [NM_014428]	-0.594005	8.93794	-4.46645	0.000223744	0.00716034
44475	40485	A_24_P273245	A_24_P273245	A_24_P273245	Unknown	-0.469115	8.35777	-4.46581	0.000224082	0.00716268
25649	23438	A_23_P7030	MRPL3	NM_007208	Homo sapiens mitochondrial ribosomal protein L3 (MRPL3), nuclear gene encoding mitochondrial protein, mRNA [NM_007208]	-0.598192	9.92677	-4.46431	0.000224878	0.00717969
12437	11397	A_24_P269853	ACTR1A	NM_005736	Homo sapiens ARP1 actin-related protein 1 homolog A, centractin alpha (yeast) (ACTR1A), mRNA [NM_005736]	-0.529429	8.29896	-4.46113	0.000226574	0.00719299
32710	30004	A_24_P597190	LOC441066	XM_496741	PREDICTED: Homo sapiens similar to Beta-glucuronidase precursor (LOC441066), mRNA [XM_496741]	-0.485411	7.83447	-4.46198	0.000226116	0.00719299
40423	36941	A_24_P244442	BSCL2	NM_032667	Homo sapiens Bernardinelli-Seip congenital lipodystrophy 2 (seipin) (BSCL2), mRNA [NM_032667]	-0.46747	9.92764	-4.46244	0.00022587	0.00719299
11300	10411	A_24_P25020	A_24_P25020	A_24_P25020	Unknown	-0.45744	9.9761	-4.4602	0.000227068	0.00719299
17633	16081	A_24_P567454	CR603272	CR603272	full-length cDNA clone CS0DC013YI10 of Neuroblastoma Cot 25-normalized of Homo sapiens (human). [CR603272]	-0.446118	10.8932	-4.45914	0.000227637	0.00719299
32684	29955	A_24_P677525	AF336795	AF336795	Homo sapiens NM-4 mRNA, complete cds. [AF336795]	-0.424105	10.3591	-4.46072	0.00022679	0.00719299
10322	9399	A_32_P12610	E2F6	NM_198256	Homo sapiens E2F transcription factor 6 (E2F6), mRNA [NM_198256]	-0.385439	8.89617	-4.45937	0.000227513	0.00719299
10285	917	A_23_P24870	CD44	NM_000610	Homo sapiens CD44 molecule (Indian blood group) (CD44), transcript variant 1, mRNA [NM_000610]	-0.299002	12.8995	-4.45906	0.000227683	0.00719299
20725	18924	A_32_P90551	SRP68	NM_014230	Homo sapiens signal recognition particle 68kDa (SRP68), mRNA [NM_014230]	-0.675958	8.56339	-4.45269	0.000231132	0.00726388
17700	16202	A_24_P234214	HNRPLL	NM_138394	Homo sapiens heterogeneous nuclear ribonucleoprotein L-like (HNRPLL), mRNA [NM_138394]	-0.573325	9.29534	-4.45097	0.000232071	0.00726388
13598	12436	A_23_P250629	PSMB8	NM_004159	Homo sapiens proteasome (prosome, macropain) subunit, beta type, 8 (large multifunctional peptidase 7) (PSMB8), transcript variant 1, mRNA [NM_004159]	-0.489538	10.797	-4.45195	0.000231536	0.00726388
1918	1660	A_23_P201059	UBQLN4	NM_020131	Homo sapiens ubiquilin 4 (UBQLN4), mRNA [NM_020131]	-0.367972	7.74365	-4.45222	0.000231389	0.00726388
6592	5972	A_24_P228027	CYB5D2	NM_144611	Homo sapiens cytochrome b5 domain containing 2 (CYB5D2), mRNA [NM_144611]	-0.346373	9.79764	-4.45321	0.000230847	0.00726388
184	136	A_23_P111381	ATG5	NM_004849	Homo sapiens ATG5 autophagy related 5 homolog (S. cerevisiae) (ATG5), mRNA [NM_004849]	-0.227943	10.0569	-4.45361	0.000230629	0.00726388
33312	30486	A_24_P170309	A_24_P170309	A_24_P170309	Unknown	-0.446891	7.57342	-4.4482	0.000233596	0.00726507
32879	30161	A_23_P8561	RHBDD2	NM_001040457	Homo sapiens rhomboid domain containing 2 (RHBDD2), transcript variant 2, mRNA [NM_001040457]	-0.44331	10.2776	-4.44874	0.0002333	0.00726507
13403	12238	A_23_P148785	SFT2D2	NM_199344	Homo sapiens SFT2 domain containing 2 (SFT2D2), mRNA [NM_199344]	-0.364206	8.47541	-4.44798	0.000233717	0.00726507
22055	20127	A_23_P219117	EPB49	NM_001978	Homo sapiens erythrocyte membrane protein band 4.9 (dematin) (EPB49), mRNA [NM_001978]	-0.317168	6.40299	-4.44807	0.000233671	0.00726507
45195	41066	A_24_P174550	RHOA	NM_001664	Homo sapiens ras homolog gene family, member A (RHOA), mRNA [NM_001664]	-0.637317	10.4998	-4.44614	0.000234734	0.0072689
20044	18316	A_23_P75989	PAK1	NM_002576	Homo sapiens p21/Cdc42/Rac1-activated kinase 1 (STE20 homolog, yeast) (PAK1), mRNA [NM_002576]	-0.576368	9.64294	-4.44692	0.000234306	0.0072689
14112	12919	A_23_P158239	SHMT2	NM_005412	Homo sapiens serine hydroxymethyltransferase 2 (mitochondrial) (SHMT2), mRNA [NM_005412]	-0.409699	10.8524	-4.44582	0.000234913	0.0072689
11731	10730	A_24_P234391	EFHD1	NM_025202	Homo sapiens EF-hand domain family, member D1 (EFHD1), mRNA [NM_025202]	-0.708816	9.99405	-4.44467	0.000235551	0.00728032
12149	11174	A_24_P101694	A_24_P101694	A_24_P101694	Unknown	-0.472239	13.2031	-4.44311	0.000236423	0.00729251
33392	30628	A_32_P117170	ENST00000341533	ENST00000341533	Homo sapiens hypothetical metallo-hydrolase/oxidoreductase structure-containing protein (C7orf18) mRNA, complete cds. [AY357337]	-0.351516	10.1485	-4.443	0.000236483	0.00729251
22415	20475	A_23_P435501	SERINC3	NM_198941	Homo sapiens serine incorporator 3 (SERINC3), transcript variant 2, mRNA [NM_198941]	-0.595557	9.02651	-4.43726	0.000239711	0.00730067
19895	18206	A_23_P252700	UNC50	NM_014044	Homo sapiens unc-50 homolog (C. elegans) (UNC50), mRNA [NM_014044]	-0.550559	11.9404	-4.43841	0.000239061	0.00730067
43144	39414	A_23_P150852	FAM62A	NM_015292	Homo sapiens family with sequence similarity 62 (C2 domain containing), member A (FAM62A), mRNA [NM_015292]	-0.515489	10.7943	-4.43843	0.000239048	0.00730067
19822	18072	A_23_P79927	NOL5A	NM_006392	Homo sapiens nucleolar protein 5A (56kDa with KKE/D repeat) (NOL5A), mRNA [NM_006392]	-0.514906	10.9551	-4.43772	0.000239452	0.00730067
18266	16767	A_23_P63655	ATP5C1	NM_005174	Homo sapiens ATP synthase, H+ transporting, mitochondrial F1 complex, gamma polypeptide 1 (ATP5C1), nuclear gene encoding mitochondrial protein, transcript variant 2, mRNA [NM_005174]	-0.430435	11.0277	-4.44048	0.000237895	0.00730067
25966	23710	A_23_P162746	CRYL1	NM_015974	Homo sapiens crystallin, lambda 1 (CRYL1), mRNA [NM_015974]	-0.339436	11.1634	-4.4416	0.000237264	0.00730067
5738	5174	A_23_P6869	TMEM115	NM_007024	Homo sapiens transmembrane protein 115 (TMEM115), mRNA [NM_007024]	-0.467698	8.41286	-4.43507	0.000240955	0.00731075
8021	7351	A_24_P186354	A_24_P186354	A_24_P186354	Unknown	-0.427832	9.45659	-4.43524	0.00024086	0.00731075
24376	22360	A_23_P128161	TUBA6	NM_032704	Homo sapiens tubulin, alpha 6 (TUBA6), mRNA [NM_032704]	-0.797843	12.7215	-4.43258	0.000242376	0.00731609
16276	14834	A_23_P138975	RBM7	NM_016090	Homo sapiens RNA binding motif protein 7 (RBM7), mRNA [NM_016090]	-0.597517	8.75101	-4.43305	0.000242106	0.00731609
10397	9532	A_24_P134526	TSPO	NM_007311	Homo sapiens translocator protein (18kDa) (TSPO), transcript variant PBR-S, mRNA [NM_007311]	-0.197586	11.5224	-4.43261	0.00024236	0.00731609
37865	34606	A_24_P245358	ATP5A1	NM_001001937	Homo sapiens ATP synthase, H+ transporting, mitochondrial F1 complex, alpha subunit 1, cardiac muscle (ATP5A1), nuclear gene encoding mitochondrial protein, transcript variant 1, mRNA [NM_001001937]	-0.535582	13.9256	-4.4304	0.000243627	0.00732327
28957	26556	A_23_P149259	TMEM79	NM_032323	Homo sapiens transmembrane protein 79 (TMEM79), mRNA [NM_032323]	-0.425092	10.8695	-4.43025	0.000243717	0.00732327
6747	6099	A_24_P118452	SEPHS1	NM_012247	Homo sapiens selenophosphate synthetase 1 (SEPHS1), mRNA [NM_012247]	-0.390173	7.56977	-4.42923	0.000244303	0.0073253
37309	34203	A_24_P288954	CTB-1048E9.5	NM_001013694	Homo sapiens similar to SRR1-like protein (LOC402055), mRNA [NM_001013694]	-0.435045	8.6316	-4.42578	0.0002463	0.00736328
2746	2407	A_24_P470782	A_24_P470782	A_24_P470782	Unknown	-0.347198	7.64785	-4.42622	0.000246048	0.00736328
35684	32645	A_24_P311926	HLA-G	NM_002127	Homo sapiens HLA-G histocompatibility antigen, class I, G (HLA-G), mRNA [NM_002127]	-0.324233	16.8265	-4.42564	0.000246385	0.00736328
41186	37714	A_23_P314526	FLOT1	NM_005803	Homo sapiens flotillin 1 (FLOT1), mRNA [NM_005803]	-0.420278	9.26075	-4.4218	0.000248631	0.00741921
5063	4543	A_24_P12181	DC-UbP	NM_152277	Homo sapiens dendritic cell-derived ubiquitin-like protein (DC-UbP), mRNA [NM_152277]	-0.368245	8.50807	-4.41965	0.000249898	0.00741921
1228	1032	A_23_P205027	ABHD13	NM_032859	Homo sapiens abhydrolase domain containing 13 (ABHD13), mRNA [NM_032859]	-0.335907	8.57111	-4.42029	0.00024952	0.00741921
29325	26913	A_23_P7388	HDAC3	NM_003883	Homo sapiens histone deacetylase 3 (HDAC3), mRNA [NM_003883]	-0.319795	9.61646	-4.42019	0.000249579	0.00741921
32203	29545	A_24_P399009	EDC4	NM_014329	Homo sapiens enhancer of mRNA decapping 4 (EDC4), mRNA [NM_014329]	-0.308682	8.41276	-4.41986	0.000249772	0.00741921
27717	25373	A_23_P109470	THOC5	NM_001002878	Homo sapiens THO complex 5 (THOC5), transcript variant 1, mRNA [NM_001002878]	-0.250498	8.72056	-4.41803	0.000250855	0.00743948
18930	17368	A_24_P303770	CTSB	NM_147780	Homo sapiens cathepsin B (CTSB), transcript variant 2, mRNA [NM_147780]	-0.663675	11.7588	-4.41457	0.000252915	0.00749237
29227	26739	A_23_P120237	STARD7	NM_020151	Homo sapiens START domain containing 7 (STARD7), transcript variant 1, mRNA [NM_020151]	-0.384365	12.5743	-4.41275	0.000254005	0.00751643
33313	30487	A_23_P62920	KIFAP3	NM_014970	Homo sapiens kinesin-associated protein 3 (KIFAP3), mRNA [NM_014970]	-0.431516	12.0944	-4.41195	0.000254481	0.00752233
29843	27236	A_23_P30995	CYB5R4	NM_016230	Homo sapiens cytochrome b5 reductase 4 (CYB5R4), mRNA [NM_016230]	-0.342947	9.01621	-4.41054	0.000255332	0.00753925
33233	30494	A_23_P162982	DHRS4	NM_021004	Homo sapiens dehydrogenase/reductase (SDR family) member 4 (DHRS4), mRNA [NM_021004]	-0.406458	10.7689	-4.40949	0.000255966	0.00754155
17175	15705	A_32_P117338	AFG3L2	NM_006796	Homo sapiens AFG3 ATPase family gene 3-like 2 (yeast) (AFG3L2), nuclear gene encoding mitochondrial protein, mRNA [NM_006796]	-0.658793	9.21244	-4.40628	0.000257918	0.0075813
13974	12825	A_24_P221883	PARL	NM_018622	Homo sapiens presenilin associated, rhomboid-like (PARL), nuclear gene encoding mitochondrial protein, transcript variant 1, mRNA [NM_018622]	-0.42815	10.1141	-4.40585	0.000258175	0.0075813
6028	5555	A_24_P52801	OTUB1	NM_017670	Homo sapiens OTU domain, ubiquitin aldehyde binding 1 (OTUB1), transcript variant 1, mRNA [NM_017670]	-0.373393	8.80151	-4.40497	0.000258714	0.0075813
6399	5774	A_24_P296907	THAP8	NM_152658	Homo sapiens THAP domain containing 8 (THAP8), mRNA [NM_152658]	-0.214901	8.30232	-4.40674	0.000257635	0.0075813
14297	13101	A_24_P58597	A_24_P58597	A_24_P58597	Unknown	-0.436072	8.38242	-4.39934	0.000262181	0.00764981
37312	34208	A_23_P305481	ACO2	NM_001098	Homo sapiens aconitase 2, mitochondrial (ACO2), nuclear gene encoding mitochondrial protein, mRNA [NM_001098]	-0.330315	12.1166	-4.39829	0.00026283	0.00766051
18263	16762	A_23_P131611	TTC30A	NM_152275	Homo sapiens tetratricopeptide repeat domain 30A (TTC30A), mRNA [NM_152275]	-0.418395	7.58837	-4.39723	0.000263489	0.00767145
23174	21245	A_23_P102988	TXNRD2	NM_006440	Homo sapiens thioredoxin reductase 2 (TXNRD2), nuclear gene encoding mitochondrial protein, mRNA [NM_006440]	-0.471281	7.10672	-4.39632	0.000264059	0.00767981
26123	23841	A_23_P368711	LILRA6	NM_024318	Homo sapiens leukocyte immunoglobulin-like receptor, subfamily A (with TM domain), member 6 (LILRA6), mRNA [NM_024318]	-0.411176	7.49953	-4.39586	0.000264345	0.00767989
10998	10015	A_24_P398432	CENTD2	NM_139181	Homo sapiens centaurin, delta 2 (CENTD2), transcript variant 1, mRNA [NM_139181]	-0.277759	10.7777	-4.38986	0.000268123	0.00776467
33870	31032	A_23_P316601	RIT1	NM_006912	Homo sapiens Ras-like without CAAX 1 (RIT1), mRNA [NM_006912]	-0.234326	10.3808	-4.38885	0.000268759	0.0077748
15104	13784	A_32_P169574	OTUD5	NM_017602	Homo sapiens OTU domain containing 5 (OTUD5), mRNA [NM_017602]	-0.38642	7.55946	-4.3877	0.000269492	0.00777938
3479	3154	A_23_P75741	UBE2L6	NM_198183	Homo sapiens ubiquitin-conjugating enzyme E2L 6 (UBE2L6), transcript variant 2, mRNA [NM_198183]	-0.382205	10.405	-4.38787	0.000269384	0.00777938
7049	6503	A_24_P272710	RPL10	NM_006013	Homo sapiens ribosomal protein L10 (RPL10), mRNA [NM_006013]	-0.402119	15.0001	-4.38609	0.000270524	0.00780088
18136	16536	A_23_P129209	IDH2	NM_002168	Homo sapiens isocitrate dehydrogenase 2 (NADP+), mitochondrial (IDH2), mRNA [NM_002168]	-0.606349	11.4625	-4.3852	0.000271092	0.00780245
13258	12130	A_24_P62615	CAP1	NM_006367	Homo sapiens CAP, adenylate cyclase-associated protein 1 (yeast) (CAP1), mRNA [NM_006367]	-0.455228	11.0991	-4.3851	0.000271154	0.00780245
22627	20708	A_23_P254079	GENX-3414	NM_003943	Homo sapiens genethonin 1 (GENX-3414), mRNA [NM_003943]	-0.615641	7.8227	-4.3824	0.000272891	0.00784409
12098	11082	A_23_P36140	B3GAT3	NM_012200	Homo sapiens beta-1,3-glucuronyltransferase 3 (glucuronosyltransferase I) (B3GAT3), mRNA [NM_012200]	-0.329031	9.11306	-4.37772	0.000275926	0.00792294
25223	23123	A_24_P315873	ENST00000354937	ENST00000354937	Homo sapiens cDNA FLJ90283 fis, clone NT2RP1000579, highly similar to Human succinate dehydrogenase flavoprotein subunit (SDH) mRNA. [AK074764]	-0.552143	10.4801	-4.37616	0.000276946	0.00793219
6402	5780	A_23_P90589	MRPL44	NM_022915	Homo sapiens mitochondrial ribosomal protein L44 (MRPL44), nuclear gene encoding mitochondrial protein, mRNA [NM_022915]	-0.336621	10.0311	-4.37544	0.000277419	0.00793219
41415	37822	A_23_P132365	LDOC1L	NM_032287	Homo sapiens leucine zipper, down-regulated in cancer 1-like (LDOC1L), mRNA [NM_032287]	-0.396056	11.2511	-4.37427	0.000278185	0.00794096
24962	22807	A_24_P303127	FLJ33641	NM_152687	Homo sapiens hypothetical protein FLJ33641 (FLJ33641), mRNA [NM_152687]	-0.347529	7.39157	-4.37408	0.000278312	0.00794096
13211	12037	A_24_P20200	PLEKHB2	NM_017958	Homo sapiens pleckstrin homology domain containing, family B (evectins) member 2 (PLEKHB2), transcript variant 2, mRNA [NM_017958]	-0.573083	8.57322	-4.37197	0.000279702	0.0079555
40999	37530	A_23_P6935	CD47	NM_198793	Homo sapiens CD47 molecule (CD47), transcript variant 2, mRNA [NM_198793]	-0.570692	11.1496	-4.37215	0.000279586	0.0079555
36125	33132	A_24_P169645	A_24_P169645	A_24_P169645	Unknown	-0.447458	9.61511	-4.37145	0.000280046	0.00795694
40174	36794	A_23_P436526	MGC26694	NM_178526	Homo sapiens hypothetical protein MGC26694 (MGC26694), mRNA [NM_178526]	-0.190214	8.27097	-4.37066	0.000280573	0.00795998
18280	16637	A_23_P131653	PIGF	NM_002643	Homo sapiens phosphatidylinositol glycan anchor biosynthesis, class F (PIGF), transcript variant 1, mRNA [NM_002643]	-0.477009	10.1396	-4.36948	0.000281354	0.00796073
38818	35579	A_23_P403971	C20orf116	NM_023935	Homo sapiens chromosome 20 open reading frame 116 (C20orf116), mRNA [NM_023935]	-0.336465	11.955	-4.36974	0.000281184	0.00796073
30875	28195	A_24_P72479	ARPC1A	NM_006409	Homo sapiens actin related protein 2/3 complex, subunit 1A, 41kDa (ARPC1A), mRNA [NM_006409]	-0.301543	12.6096	-4.36824	0.000282183	0.00796755
19457	17868	A_23_P128541	TRAFD1	NM_006700	Homo sapiens TRAF-type zinc finger domain containing 1 (TRAFD1), mRNA [NM_006700]	-0.488294	8.05797	-4.36383	0.000285135	0.00799261
22384	20417	A_23_P84565	POLR3D	NM_001722	Homo sapiens polymerase (RNA) III (DNA directed) polypeptide D, 44kDa (POLR3D), mRNA [NM_001722]	-0.400592	8.48699	-4.36398	0.000285038	0.00799261
36237	33182	A_23_P71094	GCC1	NM_024523	Homo sapiens GRIP and coiled-coil domain containing 1 (GCC1), mRNA [NM_024523]	-0.351702	9.91031	-4.36553	0.000283994	0.00799261
13038	11872	A_23_P30784	ABT1	NM_013375	Homo sapiens activator of basal transcription 1 (ABT1), mRNA [NM_013375]	-0.321576	8.1604	-4.36397	0.000285041	0.00799261
37802	34647	A_23_P51853	ZDHHC18	NM_032283	Homo sapiens zinc finger, DHHC-type containing 18 (ZDHHC18), mRNA [NM_032283]	-0.292592	8.19449	-4.36485	0.000284451	0.00799261
35503	32464	A_24_P152144	A_24_P152144	A_24_P152144	Unknown	-0.431816	8.22817	-4.36151	0.000286703	0.00801999
30269	27701	A_24_P168416	PRDX2	NM_181738	Homo sapiens peroxiredoxin 2 (PRDX2), nuclear gene encoding mitochondrial protein, transcript variant 3, mRNA [NM_181738]	-0.609528	9.33355	-4.35777	0.000289253	0.00806774
8189	7507	A_24_P327815	STIP1	NM_006819	Homo sapiens stress-induced-phosphoprotein 1 (Hsp70/Hsp90-organizing protein) (STIP1), mRNA [NM_006819]	-0.516134	8.78349	-4.35844	0.000288791	0.00806774
22685	20819	A_23_P113789	USP19	NM_006677	Homo sapiens ubiquitin specific peptidase 19 (USP19), mRNA [NM_006677]	-0.390812	8.52783	-4.35466	0.000291385	0.00808422
37275	34140	A_24_P234572	RAB7	NM_004637	Homo sapiens RAB7, member RAS oncogene family (RAB7), mRNA [NM_004637]	-0.328162	9.85356	-4.35475	0.000291328	0.00808422
36721	33594	A_23_P112397	FBXW5	NM_018998	Homo sapiens F-box and WD-40 domain protein 5 (FBXW5), mRNA [NM_018998]	-0.31273	12.1412	-4.3558	0.000290599	0.00808422
4519	3999	A_23_P26444	GBL	NM_022372	Homo sapiens G protein beta subunit-like (GBL), mRNA [NM_022372]	-0.402343	8.96954	-4.35362	0.000292102	0.00808755
30792	28198	A_24_P264143	A_24_P264143	A_24_P264143	Unknown	-0.350867	12.142	-4.35396	0.000291871	0.00808755
12467	11453	A_23_P151614	PSME1	NM_006263	Homo sapiens proteasome (prosome, macropain) activator subunit 1 (PA28 alpha) (PSME1), transcript variant 1, mRNA [NM_006263]	-0.387507	9.28353	-4.35221	0.000293077	0.00810291
14961	13683	A_24_P48139	ADAT1	NM_012091	Homo sapiens adenosine deaminase, tRNA-specific 1 (ADAT1), mRNA [NM_012091]	-0.516677	7.35349	-4.35069	0.000294136	0.00811245
14369	13079	A_24_P264416	A_24_P264416	A_24_P264416	Unknown	-0.50227	13.0439	-4.3506	0.000294198	0.00811245
4371	3876	A_23_P140821	PARD6A	NM_016948	Homo sapiens par-6 partitioning defective 6 homolog alpha (C.elegans) (PARD6A), transcript variant 1, mRNA [NM_016948]	-0.472973	7.72119	-4.34868	0.000295537	0.00814108
12722	11609	A_23_P339773	FAM79A	NM_182752	Homo sapiens family with sequence similarity 79, member A (FAM79A), mRNA [NM_182752]	-0.629229	9.78503	-4.34723	0.000296553	0.0081525
17966	16380	A_23_P35989	ALKBH3	NM_139178	Homo sapiens alkB, alkylation repair homolog 3 (E. coli) (ALKBH3), mRNA [NM_139178]	-0.355493	8.77717	-4.34337	0.000299271	0.00819398
12195	11102	A_24_P210637	D4ST1	NM_130468	Homo sapiens dermatan 4 sulfotransferase 1 (D4ST1), mRNA [NM_130468]	-0.4356	7.87513	-4.33766	0.000303336	0.00824697
42034	38498	A_32_P170925	ENST00000360201	ENST00000360201	Homo sapiens thioredoxin reductase 3, mRNA (cDNA clone IMAGE:5270485), partial cds. [BC050032]	-0.389203	8.97561	-4.33775	0.000303272	0.00824697
18095	16613	A_23_P114774	PMVK	NM_006556	Homo sapiens phosphomevalonate kinase (PMVK), mRNA [NM_006556]	-0.356202	12.5695	-4.33792	0.000303149	0.00824697
35370	32375	A_23_P5845	KHK	NM_000221	Homo sapiens ketohexokinase (fructokinase) (KHK), transcript variant a, mRNA [NM_000221]	-0.447535	8.33739	-4.33641	0.000304233	0.00825027
15156	13876	A_24_P859431	A_24_P859431	A_24_P859431	Unknown	-0.408754	9.64978	-4.33642	0.000304228	0.00825027
35963	32839	A_23_P59602	FLJ20323	NM_019005	Homo sapiens hypothetical protein FLJ20323 (FLJ20323), mRNA [NM_019005]	-0.300465	10.5786	-4.33622	0.000304371	0.00825027
37398	34211	A_23_P80122	WRB	NM_004627	Homo sapiens tryptophan rich basic protein (WRB), mRNA [NM_004627]	-0.477145	10.2699	-4.33416	0.000305856	0.00825731
13906	12701	A_23_P110879	TRAF3IP2	NM_147686	Homo sapiens TRAF3 interacting protein 2 (TRAF3IP2), transcript variant 2, mRNA [NM_147686]	-0.46879	7.90592	-4.334	0.000305979	0.00825731
5931	5374	A_24_P161393	A_24_P161393	A_24_P161393	Unknown	-0.435807	13.4003	-4.33539	0.00030497	0.00825731
29252	26783	A_23_P80156	PRMT2	NM_206962	Homo sapiens protein arginine methyltransferase 2 (PRMT2), transcript variant 1, mRNA [NM_206962]	-0.428557	10.4797	-4.33375	0.000306153	0.00825731
13326	12253	A_23_P103282	TMEM59	NM_004872	Homo sapiens transmembrane protein 59 (TMEM59), mRNA [NM_004872]	-0.409858	13.8522	-4.33219	0.000307291	0.00827765
22663	20776	A_24_P79591	BE535360	BE535360	601058513F1 NIH_MGC_10 Homo sapiens cDNA clone IMAGE:3445322 5', mRNA sequence [BE535360]	-0.405565	7.32214	-4.33187	0.000307519	0.00827765
16687	15277	A_32_P146286	ENST00000339892	ENST00000339892	ACTG_BOVIN (P63258) Actin, cytoplasmic 2 (Gamma-actin), partial (68%) [THC2426775]	-0.586437	12.1912	-4.32813	0.000310256	0.00828408
22855	20968	A_24_P383680	A_24_P383680	A_24_P383680	Unknown	-0.511726	7.7432	-4.32835	0.00031009	0.00828408
28053	25682	A_24_P350307	A_24_P350307	A_24_P350307	Unknown	-0.459653	11.9802	-4.32725	0.0003109	0.00828408
8494	7752	A_24_P330971	EIF3S12	NM_013234	Homo sapiens eukaryotic translation initiation factor 3, subunit 12 (EIF3S12), mRNA [NM_013234]	-0.429549	12.4443	-4.32859	0.000309916	0.00828408
41512	2450	A_23_P30024	NFKB1	NM_003998	Homo sapiens nuclear factor of kappa light polypeptide gene enhancer in B-cells 1 (p105) (NFKB1), mRNA [NM_003998]	-0.308909	11.3217	-4.32991	0.000308952	0.00828408
16720	15339	A_23_P9166	TLN1	NM_006289	Homo sapiens talin 1 (TLN1), mRNA [NM_006289]	-0.291466	7.47962	-4.3289	0.000309685	0.00828408
16828	15386	A_24_P4816	GABARAPL1	NM_031412	Homo sapiens GABA(A) receptor-associated protein like 1 (GABARAPL1), mRNA [NM_031412]	-0.334473	9.65111	-4.32585	0.000311932	0.00828943
12622	11581	A_23_P153698	BTBD2	NM_017797	Homo sapiens BTB (POZ) domain containing 2 (BTBD2), mRNA [NM_017797]	-0.230107	9.53065	-4.32614	0.000311718	0.00828943
1725	1461	A_23_P60225	GRHPR	NM_012203	Homo sapiens glyoxylate reductase/hydroxypyruvate reductase (GRHPR), mRNA [NM_012203]	-0.521208	11.204	-4.3243	0.000313076	0.00830356
29498	26919	A_24_P5026	AK091569	AK091569	Homo sapiens cDNA FLJ34250 fis, clone FCBBF4000529. [AK091569]	-0.384002	7.43753	-4.32385	0.000313412	0.00830435
20072	18366	A_23_P35820	CFL1	NM_005507	Homo sapiens cofilin 1 (non-muscle) (CFL1), mRNA [NM_005507]	-0.442795	11.7331	-4.32148	0.000315169	0.00834194
35568	32589	A_23_P106906	PPL	NM_002705	Homo sapiens periplakin (PPL), mRNA [NM_002705]	-0.347331	9.49377	-4.32111	0.000315446	0.00834194
23132	21166	A_23_P29594	RPL39L	NM_052969	Homo sapiens ribosomal protein L39-like (RPL39L), mRNA [NM_052969]	-0.592635	9.89399	-4.32015	0.000316161	0.00835268
30579	27955	A_23_P8311	TTRAP	NM_016614	Homo sapiens TRAF and TNF receptor associated protein (TTRAP), mRNA [NM_016614]	-0.262594	12.0352	-4.31952	0.000316638	0.00835716
1323	1053	A_23_P77020	TINF2	NM_012461	Homo sapiens TERF1 (TRF1)-interacting nuclear factor 2 (TINF2), mRNA [NM_012461]	-0.202134	12.857	-4.31813	0.000317676	0.00836013
41968	38374	A_24_P761457	A_24_P761457	A_24_P761457	Unknown	-0.310057	9.25535	-4.31717	0.000318399	0.00837102
14488	13290	A_32_P123652	TSPAN33	NM_178562	Homo sapiens tetraspanin 33 (TSPAN33), mRNA [NM_178562]	-0.294081	6.81229	-4.31516	0.000319916	0.00840275
42205	38653	A_23_P258714	VARS	NM_006295	Homo sapiens valyl-tRNA synthetase (VARS), mRNA [NM_006295]	-0.348118	9.79666	-4.31308	0.000321491	0.00842779
21323	19562	A_23_P5731	FAHD2A	NM_016044	Homo sapiens fumarylacetoacetate hydrolase domain containing 2A (FAHD2A), mRNA [NM_016044]	-0.320567	9.72693	-4.31263	0.00032184	0.00842878
20573	18803	A_32_P94087	LOC402176	NM_001011538	Homo sapiens similar to 60S ribosomal protein L21 (LOC402176), mRNA [NM_001011538]	-0.47498	13.6644	-4.31118	0.00032294	0.00844129
16832	15393	A_23_P204304	PTPRO	NM_030667	Homo sapiens protein tyrosine phosphatase, receptor type, O (PTPRO), transcript variant 1, mRNA [NM_030667]	-0.450311	7.50145	-4.31138	0.000322791	0.00844129
32860	30127	A_23_P2793	ALOX5AP	NM_001629	Homo sapiens arachidonate 5-lipoxygenase-activating protein (ALOX5AP), mRNA [NM_001629]	-0.671767	10.9537	-4.30852	0.000324979	0.00847008
7774	7057	A_23_P92687	DAP	NM_004394	Homo sapiens death-associated protein (DAP), mRNA [NM_004394]	-0.640641	11.641	-4.30636	0.000326649	0.00850542
13820	12698	A_23_P395033	DTX2	NM_020892	Homo sapiens deltex homolog 2 (Drosophila) (DTX2), mRNA [NM_020892]	-0.369783	7.09594	-4.30498	0.000327715	0.00851295
34922	32023	A_24_P237278	NIPSNAP1	NM_003634	Homo sapiens nipsnap homolog 1 (C. elegans) (NIPSNAP1), mRNA [NM_003634]	-0.336178	8.15203	-4.30557	0.000327257	0.00851295
29406	26908	A_24_P187448	A_24_P187448	A_24_P187448	Unknown	-0.424847	7.40827	-4.30393	0.000328531	0.00851353
27262	24998	A_24_P182182	SLC25A5	NM_001152	Homo sapiens solute carrier family 25 (mitochondrial carrier; adenine nucleotide translocator), member 5 (SLC25A5), mRNA [NM_001152]	-0.635058	13.3701	-4.30132	0.00033056	0.00854161
25481	23284	A_24_P235870	RNF121	NM_018320	Homo sapiens ring finger protein 121 (RNF121), transcript variant 1, mRNA [NM_018320]	-0.468394	7.94353	-4.29966	0.000331865	0.00856716
44400	40501	A_23_P34568	ADPRHL2	NM_017825	Homo sapiens ADP-ribosylhydrolase like 2 (ADPRHL2), mRNA [NM_017825]	-0.281057	10.0256	-4.29484	0.000335666	0.00865704
17360	15888	A_24_P416728	AES	NM_198970	Homo sapiens amino-terminal enhancer of split (AES), transcript variant 3, mRNA [NM_198970]	-0.532405	9.92639	-4.29376	0.000336529	0.00867106
12706	11580	A_23_P171314	FUNDC2	NM_023934	Homo sapiens FUN14 domain containing 2 (FUNDC2), mRNA [NM_023934]	-0.519342	9.68929	-4.28981	0.00033969	0.0087359
5447	4944	A_24_P276628	PPT1	NM_000310	Homo sapiens palmitoyl-protein thioesterase 1 (ceroid-lipofuscinosis, neuronal 1, infantile) (PPT1), mRNA [NM_000310]	-0.68558	9.67239	-4.28866	0.000340611	0.0087462
27029	24727	A_24_P714707	A_24_P714707	A_24_P714707	Unknown	-0.446222	7.15055	-4.28771	0.000341381	0.0087462
26164	23913	A_23_P60943	AF152351	AF152351	Homo sapiens TIMM13a mRNA, complete cds. [AF152351]	-0.294407	11.9229	-4.28774	0.000341357	0.0087462
9988	9100	A_23_P23194	PINK1	NM_032409	Homo sapiens PTEN induced putative kinase 1 (PINK1), mRNA [NM_032409]	-0.465377	11.4725	-4.28543	0.000343224	0.00877682
6400	5776	A_24_P70993	CD99	NM_002414	Homo sapiens CD99 molecule (CD99), mRNA [NM_002414]	-0.451225	10.9471	-4.28458	0.000343918	0.00878008
23641	21637	A_32_P6274	A_32_P6274	A_32_P6274	Unknown	-0.405272	9.69212	-4.28363	0.000344689	0.0087894
33391	30626	A_24_P256060	A_24_P256060	A_24_P256060	Unknown	-0.274971	7.26595	-4.28011	0.00034757	0.00884622
21010	19134	A_23_P66481	RTN4RL1	NM_178568	Homo sapiens reticulon 4 receptor-like 1 (RTN4RL1), mRNA [NM_178568]	-0.505727	10.0093	-4.27676	0.00035034	0.00890792
7731	7129	A_24_P8768	MRPL20	NM_017971	Homo sapiens mitochondrial ribosomal protein L20 (MRPL20), nuclear gene encoding mitochondrial protein, mRNA [NM_017971]	-0.343035	12.6724	-4.27605	0.000350923	0.00890792
5492	5029	A_23_P314584	MAPKAPK3	NM_004635	Homo sapiens mitogen-activated protein kinase-activated protein kinase 3 (MAPKAPK3), mRNA [NM_004635]	-0.289182	10.4569	-4.27473	0.00035202	0.00890792
12386	11303	A_23_P83289	CEECAM1	NM_016174	Homo sapiens cerebral endothelial cell adhesion molecule 1 (CEECAM1), mRNA [NM_016174]	-0.334946	7.06703	-4.27256	0.000353839	0.00893032
40960	37462	A_23_P24755	STX5	NM_003164	Homo sapiens syntaxin 5 (STX5), mRNA [NM_003164]	-0.297033	10.33	-4.26902	0.000356808	0.00897543
35052	32102	A_23_P168443	EPHB4	NM_004444	Homo sapiens EPH receptor B4 (EPHB4), mRNA [NM_004444]	-0.447229	8.87791	-4.26762	0.000357995	0.00898918
34483	31532	A_24_P379379	CAPZA1	NM_006135	Homo sapiens capping protein (actin filament) muscle Z-line, alpha 1 (CAPZA1), mRNA [NM_006135]	-0.422715	8.6853	-4.26742	0.000358161	0.00898918
26544	24299	A_24_P392312	A_24_P392312	A_24_P392312	Unknown	-0.671641	11.8434	-4.26598	0.000359383	0.00899378
23810	21788	A_24_P233850	SDHC	NM_003001	Homo sapiens succinate dehydrogenase complex, subunit C, integral membrane protein, 15kDa (SDHC), nuclear gene encoding mitochondrial protein, transcript variant 1, mRNA [NM_003001]	-0.55169	10.9991	-4.26526	0.000360003	0.00899378
33165	30367	A_23_P42563	TNPO3	NM_012470	Homo sapiens transportin 3 (TNPO3), mRNA [NM_012470]	-0.545795	8.05409	-4.26592	0.000359434	0.00899378
44009	40163	A_23_P302094	IMP4	NM_033416	Homo sapiens IMP4, U3 small nucleolar ribonucleoprotein, homolog (yeast) (IMP4), mRNA [NM_033416]	-0.249441	10.6922	-4.26547	0.000359824	0.00899378
34764	31890	A_24_P609932	A_24_P609932	A_24_P609932	Unknown	-0.306532	9.86675	-4.26175	0.000363004	0.00905205
7027	6464	A_23_P1343	STAM	NM_003473	Homo sapiens signal transducing adaptor molecule (SH3 domain and ITAM motif) 1 (STAM), mRNA [NM_003473]	-0.28978	7.88568	-4.25991	0.000364589	0.00908104
7238	6537	A_23_P435941	SAMD1	NM_138352	Homo sapiens sterile alpha motif domain containing 1 (SAMD1), mRNA [NM_138352]	-0.423075	8.87729	-4.25887	0.000365486	0.00908508
2875	2491	A_24_P279328	SKIP	NM_130766	Homo sapiens skeletal muscle and kidney enriched inositol phosphatase (SKIP), transcript variant 2, mRNA [NM_130766]	-0.178028	9.11905	-4.25866	0.000365669	0.00908508
34781	31770	A_23_P29422	GYG1	NM_004130	Homo sapiens glycogenin 1 (GYG1), mRNA [NM_004130]	-0.472467	8.07434	-4.2569	0.000367189	0.00910425
4766	4299	A_23_P100355	PPP4C	NM_002720	Homo sapiens protein phosphatase 4 (formerly X), catalytic subunit (PPP4C), mRNA [NM_002720]	-0.331235	11.8308	-4.2566	0.000367448	0.00910425
4898	4388	A_32_P123	THC2295911	THC2295911	ADT2_HUMAN ADP,ATP carrier protein, fibroblast isoform (ADP/ATP translocase 2)(Adenine nucleotide translocator 2) (ANT 2). {Homo sapiens;} , partial (62%) [THC2295911]	-0.585169	13.046	-4.25618	0.000367821	0.00910516
32152	29450	A_24_P808534	DHX9	NM_001357	Homo sapiens DEAH (Asp-Glu-Ala-His) box polypeptide 9 (DHX9), mRNA [NM_001357]	-0.456121	9.17813	-4.2537	0.000369981	0.0091363
44393	40490	A_23_P14636	MFAP1	NM_005926	Homo sapiens microfibrillar-associated protein 1 (MFAP1), mRNA [NM_005926]	-0.442207	11.5929	-4.25417	0.000369567	0.0091363
13964	12808	A_23_P150207	BAD	NM_004322	Homo sapiens BCL2-antagonist of cell death (BAD), transcript variant 1, mRNA [NM_004322]	-0.404888	12.3682	-4.24894	0.000374171	0.00921685
36093	33077	A_24_P122050	PSMF1	NM_006814	Homo sapiens proteasome (prosome, macropain) inhibitor subunit 1 (PI31) (PSMF1), transcript variant 1, mRNA [NM_006814]	-0.405142	8.95798	-4.24786	0.000375129	0.00921871
8730	8038	A_23_P29204	MTP18	NM_016498	Homo sapiens mitochondrial protein 18 kDa (MTP18), nuclear gene encoding mitochondrial protein, transcript variant 1, mRNA [NM_016498]	-0.3191	9.28201	-4.24743	0.000375512	0.00921977
2149	1768	A_24_P303480	RAB32	NM_006834	Homo sapiens RAB32, member RAS oncogene family (RAB32), mRNA [NM_006834]	-0.553473	9.09512	-4.24531	0.000377397	0.00924902
22945	20979	A_23_P394605	ENST00000265341	ENST00000265341	Homo sapiens mRNA; cDNA DKFZp564I062 (from clone DKFZp564I062). [AL080064]	-0.405367	9.59755	-4.24494	0.000377727	0.00924902
31905	29155	A_24_P280953	A_24_P280953	A_24_P280953	Unknown	-0.666925	10.2502	-4.24021	0.000381981	0.00932146
22683	20815	A_32_P31992	A_32_P31992	A_32_P31992	Unknown	-0.566744	10.3084	-4.23714	0.000384764	0.00932863
7480	6828	A_24_P204144	A_24_P204144	A_24_P204144	Unknown	-0.447025	16.1283	-4.23787	0.000384105	0.00932863
37053	33892	A_32_P74901	A_32_P74901	A_32_P74901	Unknown	-0.273807	7.39111	-4.23628	0.000385555	0.00933945
27497	25123	A_23_P213350	A_23_P213350	A_23_P213350	Unknown	-0.354334	7.71168	-4.23448	0.000387196	0.00937084
30364	27717	A_23_P210015	CR616748	CR616748	full-length cDNA clone CS0DK007YM08 of HeLa cells Cot 25-normalized of Homo sapiens (human). [CR616748]	-0.265613	9.82308	-4.23371	0.000387902	0.00937955
41756	38136	A_23_P126457	ISG20L2	NM_030980	Homo sapiens interferon stimulated exonuclease gene 20kDa-like 2 (ISG20L2), mRNA [NM_030980]	-0.322311	9.47297	-4.23321	0.00038836	0.00938225
34258	1120	A_23_P104199	ITGB1	NM_133376	Homo sapiens integrin, beta 1 (fibronectin receptor, beta polypeptide, antigen CD29 includes MDF2, MSK12) (ITGB1), transcript variant 1E, mRNA [NM_133376]	-0.735725	10.6109	-4.23253	0.000388987	0.00938904
35859	32804	A_23_P350070	RCHY1	NM_015436	Homo sapiens ring finger and CHY zinc finger domain containing 1 (RCHY1), transcript variant 1, mRNA [NM_015436]	-0.333977	10.5573	-4.22884	0.000392398	0.00944614
43843	40025	A_23_P389692	KIAA1328	NM_020776	Homo sapiens KIAA1328 (KIAA1328), mRNA [NM_020776]	-0.220798	7.55232	-4.22899	0.000392255	0.00944614
3962	3586	A_23_P29318	SAMM50	NM_015380	Homo sapiens sorting and assembly machinery component 50 homolog (S. cerevisiae) (SAMM50), mRNA [NM_015380]	-0.326474	11.8044	-4.22684	0.000394257	0.00946948
28259	25903	A_23_P313	PEF1	NM_012392	Homo sapiens penta-EF-hand domain containing 1 (PEF1), mRNA [NM_012392]	-0.303412	10.884	-4.2263	0.000394765	0.00946948
26781	24423	A_23_P88201	C14orf10	NM_017917	Homo sapiens chromosome 14 open reading frame 10 (C14orf10), mRNA [NM_017917]	-0.3031	11.3582	-4.2263	0.000394766	0.00946948
12838	11659	A_23_P31844	ATP6V1B2	NM_001693	Homo sapiens ATPase, H+ transporting, lysosomal 56/58kDa, V1 subunit B2 (ATP6V1B2), mRNA [NM_001693]	-0.484078	10.7295	-4.22398	0.000396936	0.00948961
41071	37508	A_23_P138819	MRPL49	NM_004927	Homo sapiens mitochondrial ribosomal protein L49 (MRPL49), nuclear gene encoding mitochondrial protein, mRNA [NM_004927]	-0.394724	7.58952	-4.22319	0.000397683	0.00949743
28372	25953	A_24_P925100	AA311568	AA311568	AA311568 EST182446 Jurkat T-cells VI Homo sapiens cDNA 5' end, mRNA sequence [AA311568]	-0.174645	8.26994	-4.22278	0.000398065	0.0094982
26876	24595	A_23_P16469	PLAUR	NM_001005377	Homo sapiens plasminogen activator, urokinase receptor (PLAUR), transcript variant 3, mRNA [NM_001005377]	-0.550787	9.27967	-4.221	0.000399744	0.00951314
27053	24770	A_24_P6949	FLJ14346	NM_025029	Homo sapiens hypothetical protein FLJ14346 (FLJ14346), mRNA [NM_025029]	-0.467466	11.095	-4.22044	0.000400278	0.00951318
33628	30748	A_23_P206697	CYB5B	NM_030579	Homo sapiens cytochrome b5 type B (outer mitochondrial membrane) (CYB5B), mRNA [NM_030579]	-0.391492	9.62871	-4.22016	0.000400539	0.00951318
14005	12879	A_24_P264004	A_24_P264004	A_24_P264004	Unknown	-0.401973	8.1022	-4.2185	0.00040212	0.00952786
32694	29973	A_32_P60459	OTUD1	AB188491	Homo sapiens mRNA, clone: TH020D07. [AB188491]	-0.401635	9.70177	-4.21882	0.00040181	0.00952786
39984	36607	A_23_P215111	ATP6V0A4	NM_020632	Homo sapiens ATPase, H+ transporting, lysosomal V0 subunit a4 (ATP6V0A4), transcript variant 1, mRNA [NM_020632]	-0.679906	8.5741	-4.21565	0.000404836	0.00956497
11960	10989	A_32_P27532	AV698092	AV698092	AV698092 GKC Homo sapiens cDNA clone GKCGUA09 5', mRNA sequence [AV698092]	-0.564992	9.77461	-4.21549	0.000404992	0.00956497
7663	7009	A_24_P788772	THC2373524	THC2373524	APE_HUMAN (P02649) Apolipoprotein E precursor (Apo-E), partial (50%) [THC2373524]	-0.564937	11.906	-4.21086	0.000409452	0.00963765
16496	15082	A_23_P90888	CHRNA1	NM_000079	Homo sapiens cholinergic receptor, nicotinic, alpha 1 (muscle) (CHRNA1), transcript variant 2, mRNA [NM_000079]	-0.311672	6.5118	-4.21083	0.000409481	0.00963765
10258	9434	A_24_P142983	PIK4CA	NM_002650	Homo sapiens phosphatidylinositol 4-kinase, catalytic, alpha polypeptide (PIK4CA), transcript variant 1, mRNA [NM_002650]	-0.268323	11.5474	-4.20911	0.000411149	0.00964066
5880	5283	A_24_P291826	SYTL3	NM_001009991	Homo sapiens synaptotagmin-like 3 (SYTL3), mRNA [NM_001009991]	-0.334416	8.00662	-4.20741	0.000412813	0.00965564
8652	7892	A_23_P137209	UBE1	NM_003334	Homo sapiens ubiquitin-activating enzyme E1 (A1S9T and BN75 temperature sensitivity complementing) (UBE1), transcript variant 1, mRNA [NM_003334]	-0.405822	10.7463	-4.20642	0.000413778	0.00966886
11797	10848	A_24_P246963	A_24_P246963	A_24_P246963	Unknown	-0.312845	9.66074	-4.20586	0.000414332	0.00967347
36031	32967	A_23_P266	PIN1L	U82382	Homo sapiens PIN1 peptidyl-prolyl cis/trans isomerase-like (PIN1L) mRNA, complete cds. [U82382]	-0.503586	9.0107	-4.20382	0.000416336	0.00968687
42855	39208	A_32_P159150	CHCHD3	NM_017812	Homo sapiens coiled-coil-helix-coiled-coil-helix domain containing 3 (CHCHD3), mRNA [NM_017812]	-0.443742	9.9076	-4.20328	0.000416861	0.00969076
12869	11716	A_23_P257497	ENST00000367073	ENST00000367073	U92818 unnamed HERV-H protein {Homo sapiens;} , partial (23%) [THC2436941]	-0.401709	7.47447	-4.20265	0.000417485	0.00969695
8906	8204	A_23_P152344	GTF3C1	NM_001520	Homo sapiens general transcription factor IIIC, polypeptide 1, alpha 220kDa (GTF3C1), mRNA [NM_001520]	-0.40165	9.12033	-4.20212	0.00041801	0.00970083
15080	13740	A_24_P365954	THAP11	NM_020457	Homo sapiens THAP domain containing 11 (THAP11), mRNA [NM_020457]	-0.380328	8.81784	-4.20071	0.000419408	0.00972496
32962	30158	A_32_P74942	BI024548	BI024548	BI024548 PM3-MT0205-300101-005-f07 MT0205 Homo sapiens cDNA, mRNA sequence [BI024548]	-0.363464	8.53113	-4.20001	0.000420101	0.00973269
15050	13692	A_23_P139547	TUBA3	NM_006009	Homo sapiens tubulin, alpha 3 (TUBA3), mRNA [NM_006009]	-0.662009	12.8782	-4.19948	0.000420635	0.00973676
35567	32587	A_24_P680548	CN272797	CN272797	CN272797 17000600009278 GRN_PREHEP Homo sapiens cDNA 5', mRNA sequence [CN272797]	-0.39998	12.6137	-4.19743	0.000422678	0.00976137
34637	31658	A_23_P127150	TUBGCP2	NM_006659	Homo sapiens tubulin, gamma complex associated protein 2 (TUBGCP2), mRNA [NM_006659]	-0.275725	10.4364	-4.19705	0.000423059	0.00976137
43162	39448	A_24_P406132	MAPK13	NM_002754	Homo sapiens mitogen-activated protein kinase 13 (MAPK13), mRNA [NM_002754]	-0.423127	10.7103	-4.1962	0.000423909	0.00977082
33379	30604	A_32_P208856	A_32_P208856	A_32_P208856	Unknown	-0.473765	15.1255	-4.1927	0.000427436	0.00981595
18880	17281	A_24_P68585	SHC1	NM_183001	Homo sapiens SHC (Src homology 2 domain containing) transforming protein 1 (SHC1), transcript variant 1, mRNA [NM_183001]	-0.389832	7.9733	-4.19246	0.000427678	0.00981595
25571	23451	A_23_P253068	ANAPC2	NM_013366	Homo sapiens anaphase promoting complex subunit 2 (ANAPC2), mRNA [NM_013366]	-0.272479	7.68252	-4.19333	0.000426796	0.00981595
34947	31915	A_23_P76690	UCHL3	NM_006002	Homo sapiens ubiquitin carboxyl-terminal esterase L3 (ubiquitin thiolesterase) (UCHL3), mRNA [NM_006002]	-0.269891	10.7482	-4.19308	0.000427054	0.00981595
670	528	A_23_P88971	CLN3	NM_000086	Homo sapiens ceroid-lipofuscinosis, neuronal 3, juvenile (Batten, Spielmeyer-Vogt disease) (CLN3), transcript variant 2, mRNA [NM_000086]	-0.322015	11.8383	-4.19148	0.000428669	0.00983038
18644	16997	A_24_P323795	A_24_P323795	A_24_P323795	Unknown	-0.350229	7.41208	-4.18913	0.000431057	0.00987679
30394	27776	A_24_P139773	PPP1R8	NM_138558	Homo sapiens protein phosphatase 1, regulatory (inhibitor) subunit 8 (PPP1R8), transcript variant 2, mRNA [NM_138558]	-0.274929	9.55499	-4.18514	0.000435155	0.00992872
2730	2375	A_23_P209995	IL1RN	NM_173842	Homo sapiens interleukin 1 receptor antagonist (IL1RN), transcript variant 1, mRNA [NM_173842]	-0.418845	7.49062	-4.18469	0.000435616	0.00993087
23052	21018	A_23_P30884	CLIC1	NM_001288	Homo sapiens chloride intracellular channel 1 (CLIC1), mRNA [NM_001288]	-0.344732	13.5877	-4.18426	0.000436058	0.00993261
35326	32294	A_24_P100228	XBP1	NM_005080	Homo sapiens X-box binding protein 1 (XBP1), mRNA [NM_005080]	-0.815109	12.3439	-4.18387	0.000436457	0.00993335
22164	20322	A_24_P390070	SFRS9	NM_003769	Homo sapiens splicing factor, arginine/serine-rich 9 (SFRS9), mRNA [NM_003769]	-0.538803	12.2159	-4.18232	0.000438061	0.00994613
26165	23915	A_23_P142272	PAF1	NM_019088	Homo sapiens Paf1, RNA polymerase II associated factor, homolog (S. cerevisiae) (PAF1), mRNA [NM_019088]	-0.361096	9.63518	-4.1805	0.000439955	0.00994613
7334	6710	A_23_P46852	OBFC1	NM_024928	Homo sapiens oligonucleotide/oligosaccharide-binding fold containing 1 (OBFC1), mRNA [NM_024928]	-0.333257	10.3121	-4.18159	0.00043882	0.00994613
23563	21501	A_23_P401709	C20orf196	NM_152504	Homo sapiens chromosome 20 open reading frame 196 (C20orf196), mRNA [NM_152504]	-0.279301	6.8185	-4.18272	0.000437645	0.00994613
37963	34785	A_23_P165989	NEURL2	NM_080749	Homo sapiens neuralized-like 2 (Drosophila) (NEURL2), mRNA [NM_080749]	-0.208774	7.18481	-4.18075	0.000439691	0.00994613
